# Supplementary material for: The Activity of KIF14, Mieap, and EZR in a New Type of the Invasive Component, Torpedo-Like Structures, Predetermines the Metastatic Potential of Breast Cancer
Source: PubMed Central journal article supplement (PMC7409151; doi:10.3390/cancers12071909), 2020-07-15
Supplement: cancers-12-01909-s001.pdf [file cancers-12-01909-s001.pdf]

**Table S1.** Differentially expressed genes in solid and trabecular structures compared to normal breast epithelia (p-value < 0.1)

| Gene            | Solid structures |         | Trabecular structures |         |
|-----------------|------------------|---------|-----------------------|---------|
|                 | LogFC            | P-value | LogFC                 | P-value |
| <i>AACS</i>     | 2.791            | 0.038   | 3.038                 | 0.026   |
| <i>AAGAB</i>    | 3.734            | 0.032   | 3.746                 | 0.032   |
| <i>ABCA12</i>   | 5.171            | 0.001   | 5.070                 | 0.001   |
| <i>ABCC11</i>   | 5.805            | 0.003   | 3.742                 | 0.039   |
| <i>ABCF2</i>    | 3.674            | 0.008   | 2.260                 | 0.079   |
| <i>ABCG2</i>    | -2.135           | 0.038   | -2.386                | 0.023   |
| <i>ABHD16A</i>  | -2.331           | 0.025   | -3.410                | 0.002   |
| <i>ABLIM1</i>   | -1.969           | 0.035   | -2.498                | 0.010   |
| <i>ABO</i>      | -1.108           | 0.097   | -1.139                | 0.088   |
| <i>ACAA1</i>    | -1.865           | 0.021   | -2.303                | 0.006   |
| <i>ACOX2</i>    | 2.906            | 0.032   | 3.317                 | 0.017   |
| <i>ACPT</i>     | 1.542            | 0.064   | 1.914                 | 0.025   |
| <i>ACTN4</i>    | 2.217            | 0.091   | 3.592                 | 0.010   |
| <i>ACTR1B</i>   | -1.339           | 0.063   | -1.476                | 0.042   |
| <i>ACTR6</i>    | 1.723            | 0.032   | 1.515                 | 0.055   |
| <i>ADAM15</i>   | 1.370            | 0.040   | 1.268                 | 0.055   |
| <i>ADAMTS16</i> | 1.968            | 0.030   | 1.849                 | 0.040   |
| <i>ADAMTS19</i> | -1.411           | 0.059   | -1.583                | 0.037   |
| <i>ADAMTS4</i>  | 3.073            | 0.029   | 2.552                 | 0.065   |
| <i>ADAMTS5</i>  | -3.518           | 0.008   | -3.434                | 0.009   |
| <i>ADCK4</i>    | 2.323            | 0.051   | 3.843                 | 0.003   |
| <i>ADNP2</i>    | 3.725            | 0.003   | 3.363                 | 0.006   |
| <i>ADRB2</i>    | -4.990           | 0.003   | -3.719                | 0.021   |
| <i>AEBP1</i>    | 2.408            | 0.042   | 3.618                 | 0.004   |
| <i>AF111851</i> | -1.967           | 0.008   | -2.339                | 0.002   |
| <i>AGPAT4</i>   | -3.783           | 0.047   | -4.097                | 0.033   |
| <i>AGT</i>      | 2.392            | 0.041   | 3.241                 | 0.008   |
| <i>AIMP2</i>    | 3.261            | 0.012   | 2.729                 | 0.031   |
| <i>AK027667</i> | -2.933           | 0.012   | -2.304                | 0.041   |
| <i>AK075182</i> | -1.420           | 0.029   | -1.228                | 0.055   |
| <i>AK090485</i> | -1.478           | 0.063   | -1.805                | 0.027   |
| <i>AK124642</i> | -2.601           | 0.051   | -3.026                | 0.026   |
| <i>AK130224</i> | -1.889           | 0.039   | -1.908                | 0.037   |
| <i>AK5</i>      | -3.467           | 0.002   | -3.213                | 0.003   |
| <i>AKT1</i>     | 2.988            | 0.070   | 3.147                 | 0.058   |
| <i>ALCAM</i>    | 2.860            | 0.042   | 2.483                 | 0.073   |
| <i>ALDH7A1</i>  | -2.031           | 0.035   | -2.932                | 0.004   |
| <i>ALG11</i>    | 2.324            | 0.058   | 3.300                 | 0.010   |
| <i>ALG5</i>     | 2.529            | 0.008   | 2.014                 | 0.029   |
| <i>ALKBH6</i>   | 4.223            | 0.001   | 2.456                 | 0.036   |
| <i>ALYREF</i>   | 2.728            | 0.045   | 3.047                 | 0.027   |
| <i>AMOTL1</i>   | -2.854           | 0.031   | -3.137                | 0.019   |
| <i>ANKRD29</i>  | -2.397           | 0.009   | -1.864                | 0.036   |
| <i>ANKRD30A</i> | 2.178            | 0.017   | 2.420                 | 0.009   |
| <i>ANKRD35</i>  | -2.879           | 0.013   | -2.186                | 0.051   |
| <i>ANKRD36</i>  | 1.893            | 0.082   | 2.287                 | 0.040   |
| <i>ANKRD65</i>  | -3.559           | 0.002   | -3.411                | 0.002   |
| <i>ANPEP</i>    | -2.315           | 0.060   | -2.435                | 0.049   |
| <i>ANXA1</i>    | -2.595           | 0.068   | -2.957                | 0.040   |

|                    |        |       |        |       |
|--------------------|--------|-------|--------|-------|
| <i>ANXA9</i>       | 4.935  | 0.002 | 4.253  | 0.007 |
| <i>AOC3</i>        | 2.230  | 0.097 | 2.281  | 0.090 |
| <i>APIG2</i>       | 2.144  | 0.009 | 2.744  | 0.002 |
| <i>APC</i>         | 2.402  | 0.055 | 3.118  | 0.016 |
| <i>APCDD1</i>      | -4.793 | 0.008 | -3.816 | 0.029 |
| <i>APCDD1L</i>     | -2.371 | 0.090 | -3.416 | 0.019 |
| <i>APCDD1L-AS1</i> | -3.901 | 0.000 | -2.502 | 0.005 |
| <i>APOA1BP</i>     | 3.700  | 0.029 | 3.293  | 0.049 |
| <i>APOD</i>        | -3.832 | 0.034 | -3.609 | 0.044 |
| <i>APOL2</i>       | 2.639  | 0.023 | 3.033  | 0.010 |
| <i>ARF1</i>        | 2.331  | 0.060 | 2.225  | 0.072 |
| <i>ARHGEF10</i>    | -1.794 | 0.050 | -1.862 | 0.043 |
| <i>ARHGEF37</i>    | -2.643 | 0.068 | -2.620 | 0.070 |
| <i>ARHGEF3-AS1</i> | -1.691 | 0.043 | -1.470 | 0.074 |
| <i>ARIH1</i>       | -3.272 | 0.009 | -2.070 | 0.080 |
| <i>ARLAC</i>       | -5.110 | 0.002 | -4.864 | 0.003 |
| <i>ARL6IP6</i>     | 1.858  | 0.068 | 2.381  | 0.023 |
| <i>ARMC10</i>      | -1.255 | 0.079 | -2.969 | 0.000 |
| <i>ARRDC3</i>      | -2.179 | 0.075 | -2.295 | 0.062 |
| <i>ARRDC4</i>      | -2.008 | 0.075 | -2.027 | 0.073 |
| <i>ASCC3</i>       | 3.359  | 0.037 | 3.403  | 0.035 |
| <i>ASPM</i>        | 3.419  | 0.042 | 4.889  | 0.006 |
| <i>ASPN</i>        | 4.044  | 0.000 | 4.688  | 0.000 |
| <i>ATAD2</i>       | 3.859  | 0.003 | 5.215  | 0.000 |
| <i>AURKA</i>       | 3.052  | 0.015 | 4.396  | 0.001 |
| <i>AW571659</i>    | -2.770 | 0.035 | -2.719 | 0.038 |
| <i>B4GALT3</i>     | 2.914  | 0.004 | 2.957  | 0.003 |
| <i>B9D2</i>        | 2.052  | 0.076 | 3.151  | 0.010 |
| <i>BASP1</i>       | 3.711  | 0.069 | 3.376  | 0.095 |
| <i>BBOX1</i>       | -3.328 | 0.006 | -2.900 | 0.014 |
| <i>BC014063</i>    | -1.574 | 0.092 | -2.045 | 0.033 |
| <i>BC044628</i>    | -1.726 | 0.077 | -1.798 | 0.067 |
| <i>BCAP31</i>      | 1.459  | 0.035 | 1.350  | 0.048 |
| <i>BCDIN3D</i>     | 4.293  | 0.001 | 4.833  | 0.001 |
| <i>BCL9</i>        | 3.353  | 0.020 | 2.373  | 0.086 |
| <i>BF175071</i>    | -3.108 | 0.037 | -2.829 | 0.056 |
| <i>BGN</i>         | 2.947  | 0.003 | 4.852  | 0.000 |
| <i>BLVRA</i>       | 1.521  | 0.018 | 1.241  | 0.047 |
| <i>BLVRB</i>       | 1.728  | 0.077 | 1.645  | 0.091 |
| <i>BMS1</i>        | 2.990  | 0.066 | 3.456  | 0.037 |
| <i>BNC1</i>        | -2.585 | 0.012 | -1.909 | 0.053 |
| <i>BOP1</i>        | -1.824 | 0.040 | -2.742 | 0.004 |
| <i>BRMS1L</i>      | -2.203 | 0.035 | -2.056 | 0.048 |
| <i>BROX</i>        | 3.614  | 0.015 | 3.312  | 0.024 |
| <i>BST2</i>        | 2.086  | 0.038 | 2.131  | 0.035 |
| <i>BU963192</i>    | 3.430  | 0.027 | 3.839  | 0.015 |
| <i>BUB1B</i>       | 2.158  | 0.053 | 2.964  | 0.011 |
| <i>BVES</i>        | -2.099 | 0.018 | -2.015 | 0.023 |
| <i>C10orf25</i>    | -1.460 | 0.069 | -1.421 | 0.076 |
| <i>C11orf49</i>    | 1.892  | 0.048 | 1.576  | 0.093 |
| <i>C15orf26</i>    | -1.358 | 0.065 | -1.247 | 0.087 |
| <i>C15orf40</i>    | 2.866  | 0.006 | 2.195  | 0.027 |
| <i>C15orf52</i>    | -2.964 | 0.033 | -4.544 | 0.002 |
| <i>C15orf61</i>    | -1.644 | 0.097 | -3.364 | 0.002 |
| <i>C16orf45</i>    | 3.360  | 0.017 | 3.794  | 0.008 |

|                   |        |       |        |       |
|-------------------|--------|-------|--------|-------|
| <i>C16orf54</i>   | -1.944 | 0.050 | -1.752 | 0.074 |
| <i>C16orf92</i>   | -1.828 | 0.010 | -1.166 | 0.082 |
| <i>C17orf100</i>  | -2.857 | 0.015 | -2.335 | 0.041 |
| <i>C17orf62</i>   | 2.058  | 0.034 | 3.444  | 0.001 |
| <i>C18orf32</i>   | 1.720  | 0.050 | 1.954  | 0.028 |
| <i>C19orf18</i>   | -1.623 | 0.061 | -1.651 | 0.057 |
| <i>C19orf52</i>   | 3.918  | 0.003 | 3.145  | 0.014 |
| <i>C1orf186</i>   | -2.053 | 0.031 | -2.728 | 0.006 |
| <i>C1orf43</i>    | 1.124  | 0.079 | 1.193  | 0.064 |
| <i>C1orf53</i>    | 1.515  | 0.097 | 1.584  | 0.084 |
| <i>C1orf56</i>    | 1.196  | 0.061 | 1.150  | 0.071 |
| <i>C1QTNF3</i>    | 1.566  | 0.066 | 1.417  | 0.093 |
| <i>C20orf197</i>  | -1.587 | 0.075 | -1.609 | 0.072 |
| <i>C2orf40</i>    | -5.208 | 0.000 | -7.216 | 0.000 |
| <i>C2orf66</i>    | -1.618 | 0.080 | -1.659 | 0.073 |
| <i>C2orf82</i>    | -2.304 | 0.004 | -1.777 | 0.021 |
| <i>C3</i>         | -3.515 | 0.020 | -3.527 | 0.020 |
| <i>C3orf58</i>    | -2.728 | 0.064 | -3.899 | 0.011 |
| <i>C5orf60</i>    | -1.469 | 0.066 | -1.899 | 0.021 |
| <i>C6orf136</i>   | -2.626 | 0.047 | -3.484 | 0.011 |
| <i>C6orf52</i>    | 2.064  | 0.067 | 2.121  | 0.060 |
| <i>CA11</i>       | -2.161 | 0.074 | -3.613 | 0.006 |
| <i>CACNA1C</i>    | -3.116 | 0.060 | -3.084 | 0.063 |
| <i>CACNA2D1</i>   | -4.364 | 0.006 | -3.503 | 0.022 |
| <i>CADM3</i>      | -4.466 | 0.001 | -4.300 | 0.002 |
| <i>CALHM2</i>     | -1.673 | 0.077 | -3.590 | 0.001 |
| <i>CALM2</i>      | 1.106  | 0.028 | 0.834  | 0.088 |
| <i>CAPN13</i>     | 2.306  | 0.022 | 3.108  | 0.003 |
| <i>CARD6</i>      | -2.540 | 0.070 | -2.487 | 0.076 |
| <i>CAVI</i>       | -3.196 | 0.046 | -3.204 | 0.045 |
| <i>CAV2</i>       | -2.383 | 0.093 | -3.017 | 0.038 |
| <i>CCDC117</i>    | 1.772  | 0.015 | 1.176  | 0.091 |
| <i>CCDC120</i>    | -4.533 | 0.004 | -3.446 | 0.020 |
| <i>CCDC157</i>    | -1.967 | 0.031 | -1.729 | 0.055 |
| <i>CCDC158</i>    | -2.466 | 0.045 | -2.720 | 0.029 |
| <i>CCDC175</i>    | 3.297  | 0.087 | 3.167  | 0.099 |
| <i>CCDC47</i>     | 3.014  | 0.008 | 2.493  | 0.025 |
| <i>CCDC8</i>      | -2.114 | 0.054 | -1.850 | 0.088 |
| <i>CCDC92</i>     | 3.442  | 0.014 | 5.015  | 0.001 |
| <i>CCL21</i>      | -1.442 | 0.095 | -1.483 | 0.086 |
| <i>CCL28</i>      | -2.658 | 0.069 | -4.445 | 0.005 |
| <i>CCL5</i>       | -3.763 | 0.031 | -3.646 | 0.036 |
| <i>CCNB1</i>      | 2.788  | 0.032 | 2.376  | 0.062 |
| <i>CCNB2</i>      | 3.460  | 0.001 | 2.746  | 0.007 |
| <i>CCND1</i>      | 2.013  | 0.039 | 1.722  | 0.072 |
| <i>CCPG1</i>      | 1.814  | 0.042 | 1.609  | 0.067 |
| <i>CCT3</i>       | 2.207  | 0.047 | 2.967  | 0.011 |
| <i>CD109</i>      | 4.012  | 0.008 | 2.585  | 0.068 |
| <i>CD59</i>       | -2.907 | 0.092 | -4.922 | 0.008 |
| <i>CD97</i>       | -2.149 | 0.022 | -2.248 | 0.017 |
| <i>CDCA4</i>      | 2.843  | 0.080 | 4.196  | 0.014 |
| <i>CDH3</i>       | -1.444 | 0.043 | -3.467 | 0.000 |
| <i>CDKN2AIPNL</i> | 2.373  | 0.067 | 2.432  | 0.061 |
| <i>CDKN3</i>      | 3.255  | 0.014 | 2.676  | 0.039 |
| <i>CDPFI</i>      | -2.620 | 0.020 | -2.475 | 0.027 |

|                 |        |       |        |       |
|-----------------|--------|-------|--------|-------|
| <i>CDR1</i>     | 2.518  | 0.017 | 2.077  | 0.043 |
| <i>CDS2</i>     | 3.534  | 0.024 | 2.778  | 0.068 |
| <i>CENPF</i>    | 5.567  | 0.005 | 4.958  | 0.010 |
| <i>CENPW</i>    | 2.178  | 0.072 | 2.836  | 0.023 |
| <i>CEP19</i>    | 2.689  | 0.064 | 2.404  | 0.094 |
| <i>CEP55</i>    | 4.032  | 0.008 | 2.666  | 0.061 |
| <i>CEP78</i>    | 1.569  | 0.038 | 1.564  | 0.038 |
| <i>CEP85L</i>   | -2.333 | 0.053 | -2.307 | 0.055 |
| <i>CERS4</i>    | -3.547 | 0.001 | -3.409 | 0.001 |
| <i>CFB</i>      | 1.876  | 0.007 | 2.008  | 0.004 |
| <i>CFP</i>      | 2.257  | 0.080 | 2.834  | 0.032 |
| <i>CHCHD1</i>   | 2.692  | 0.023 | 1.925  | 0.091 |
| <i>CHEK1</i>    | 3.462  | 0.012 | 2.165  | 0.095 |
| <i>CHN1</i>     | 3.080  | 0.033 | 2.376  | 0.090 |
| <i>CHST2</i>    | -2.771 | 0.011 | -2.788 | 0.011 |
| <i>CHST9</i>    | -2.381 | 0.010 | -3.160 | 0.001 |
| <i>CIC</i>      | -1.908 | 0.074 | -2.387 | 0.029 |
| <i>CKS2</i>     | 2.635  | 0.006 | 2.854  | 0.004 |
| <i>CLDN11</i>   | -3.226 | 0.034 | -4.989 | 0.002 |
| <i>CLDN8</i>    | -3.129 | 0.029 | -2.314 | 0.095 |
| <i>CLEC19A</i>  | 1.218  | 0.071 | 1.814  | 0.011 |
| <i>CLGN</i>     | 2.909  | 0.021 | 3.889  | 0.004 |
| <i>CLPSL2</i>   | 4.408  | 0.006 | 2.842  | 0.061 |
| <i>CLSTN3</i>   | 1.498  | 0.098 | 1.896  | 0.041 |
| <i>CLU</i>      | -1.795 | 0.030 | -2.051 | 0.015 |
| <i>CLUAP1</i>   | 2.909  | 0.022 | 3.510  | 0.008 |
| <i>CMA1</i>     | -2.082 | 0.025 | -1.580 | 0.078 |
| <i>CMPK2</i>    | 2.827  | 0.031 | 2.290  | 0.073 |
| <i>CMTM4</i>    | -2.739 | 0.048 | -2.247 | 0.098 |
| <i>CNEP1R1</i>  | 2.404  | 0.099 | 2.841  | 0.055 |
| <i>CNIH4</i>    | 1.758  | 0.015 | 1.384  | 0.048 |
| <i>CNST</i>     | 3.014  | 0.041 | 3.596  | 0.017 |
| <i>CNTNAP3B</i> | -2.028 | 0.019 | -2.548 | 0.005 |
| <i>CNTNAP5</i>  | -2.424 | 0.062 | -2.650 | 0.043 |
| <i>COL10A1</i>  | 4.653  | 0.001 | 6.730  | 0.000 |
| <i>COL12A1</i>  | 2.971  | 0.012 | 5.315  | 0.000 |
| <i>COL17A1</i>  | -3.030 | 0.010 | -4.892 | 0.000 |
| <i>COL1A1</i>   | 4.744  | 0.000 | 5.638  | 0.000 |
| <i>COL1A2</i>   | 3.501  | 0.004 | 5.086  | 0.000 |
| <i>COL3A1</i>   | 5.485  | 0.000 | 6.466  | 0.000 |
| <i>COL5A1</i>   | 3.871  | 0.006 | 4.857  | 0.001 |
| <i>COL5A2</i>   | 6.433  | 0.000 | 7.054  | 0.000 |
| <i>COL6A3</i>   | 2.455  | 0.026 | 4.127  | 0.001 |
| <i>COMP</i>     | 3.793  | 0.005 | 4.511  | 0.002 |
| <i>COPA</i>     | 3.753  | 0.003 | 4.290  | 0.001 |
| <i>COPB2</i>    | 1.915  | 0.013 | 1.822  | 0.017 |
| <i>COQ3</i>     | -1.448 | 0.099 | -2.526 | 0.008 |
| <i>COX6C</i>    | 2.003  | 0.006 | 1.826  | 0.010 |
| <i>COX7A1</i>   | -3.167 | 0.059 | -5.240 | 0.004 |
| <i>CPAMD8</i>   | -3.884 | 0.004 | -3.425 | 0.009 |
| <i>CPS1</i>     | -3.726 | 0.007 | -4.821 | 0.001 |
| <i>CR737597</i> | -2.014 | 0.017 | -1.480 | 0.067 |
| <i>CRABP2</i>   | 2.556  | 0.048 | 2.974  | 0.024 |
| <i>CRAT</i>     | 3.383  | 0.000 | 3.348  | 0.000 |
| <i>CREB3L1</i>  | 3.051  | 0.058 | 4.144  | 0.014 |

|                  |        |       |        |       |
|------------------|--------|-------|--------|-------|
| <i>CRIP1</i>     | 3.736  | 0.000 | 3.832  | 0.000 |
| <i>CRIP2</i>     | 1.393  | 0.079 | 1.848  | 0.024 |
| <i>CRYAB</i>     | -4.198 | 0.015 | -8.426 | 0.000 |
| <i>CS</i>        | -1.205 | 0.083 | -2.170 | 0.004 |
| <i>CSN3</i>      | -4.110 | 0.011 | -3.130 | 0.044 |
| <i>CSRP1</i>     | -2.375 | 0.004 | -2.877 | 0.001 |
| <i>CST6</i>      | 3.001  | 0.048 | 2.501  | 0.093 |
| <i>CST9</i>      | -2.570 | 0.048 | -3.134 | 0.019 |
| <i>CSTA</i>      | -3.077 | 0.013 | -3.349 | 0.008 |
| <i>CTDSPL</i>    | -2.126 | 0.018 | -1.834 | 0.038 |
| <i>CTHRC1</i>    | 2.298  | 0.009 | 4.152  | 0.000 |
| <i>CTIF</i>      | 2.482  | 0.043 | 2.559  | 0.038 |
| <i>CTNND1</i>    | -2.277 | 0.020 | -2.538 | 0.011 |
| <i>CTSD</i>      | 5.419  | 0.002 | 5.184  | 0.002 |
| <i>CTSS</i>      | -1.783 | 0.029 | -2.096 | 0.013 |
| <i>CU692621</i>  | -1.068 | 0.048 | -0.891 | 0.092 |
| <i>CUEDC2</i>    | 1.978  | 0.093 | 2.122  | 0.073 |
| <i>CXorf21</i>   | -2.517 | 0.080 | -2.826 | 0.052 |
| <i>CXXC5</i>     | 1.899  | 0.024 | 1.381  | 0.089 |
| <i>CYP7B1</i>    | -3.453 | 0.002 | -2.511 | 0.016 |
| <i>CYR61</i>     | -2.964 | 0.036 | -2.596 | 0.062 |
| <i>CYSLTR2</i>   | -1.712 | 0.037 | -1.378 | 0.085 |
| <i>CYYR1</i>     | -5.640 | 0.000 | -5.796 | 0.000 |
| <i>D21S2088E</i> | -1.920 | 0.055 | -2.267 | 0.026 |
| <i>DAB2</i>      | -1.589 | 0.091 | -2.123 | 0.029 |
| <i>DAPL1</i>     | -3.174 | 0.005 | -2.835 | 0.011 |
| <i>DARS2</i>     | 2.760  | 0.008 | 2.153  | 0.031 |
| <i>DCDC2</i>     | -2.744 | 0.058 | -4.085 | 0.008 |
| <i>DDA1</i>      | 3.798  | 0.007 | 4.264  | 0.003 |
| <i>DDB2</i>      | -1.594 | 0.056 | -1.625 | 0.052 |
| <i>DDI2</i>      | -3.700 | 0.026 | -3.541 | 0.032 |
| <i>DDX39A</i>    | 1.690  | 0.093 | 2.680  | 0.012 |
| <i>DEFA5</i>     | -1.307 | 0.097 | -1.306 | 0.097 |
| <i>DEGS2</i>     | 3.417  | 0.010 | 3.696  | 0.006 |
| <i>DENND1B</i>   | 3.202  | 0.026 | 2.757  | 0.051 |
| <i>DENND6A</i>   | 2.799  | 0.022 | 2.556  | 0.035 |
| <i>DEPDC1</i>    | 2.795  | 0.042 | 3.886  | 0.007 |
| <i>DHTKD1</i>    | 2.265  | 0.072 | 2.377  | 0.060 |
| <i>DLGAP5</i>    | 2.834  | 0.026 | 2.614  | 0.038 |
| <i>DLL1</i>      | 1.784  | 0.085 | 2.749  | 0.012 |
| <i>DMD</i>       | -4.011 | 0.002 | -5.133 | 0.000 |
| <i>DNAH1</i>     | -1.401 | 0.048 | -1.846 | 0.012 |
| <i>DNAH14</i>    | 2.781  | 0.028 | 4.116  | 0.002 |
| <i>DNAH5</i>     | 2.506  | 0.073 | 3.104  | 0.030 |
| <i>DNAJA1</i>    | 2.113  | 0.026 | 1.776  | 0.056 |
| <i>DNAJC10</i>   | 2.748  | 0.009 | 1.928  | 0.055 |
| <i>DNAJC22</i>   | 2.954  | 0.008 | 2.224  | 0.037 |
| <i>DNALI1</i>    | 1.570  | 0.075 | 2.154  | 0.019 |
| <i>DNM1P46</i>   | -3.170 | 0.021 | -3.453 | 0.013 |
| <i>DOCK4</i>     | -2.306 | 0.026 | -2.418 | 0.020 |
| <i>DOLPP1</i>    | 2.833  | 0.067 | 3.258  | 0.038 |
| <i>DPF1</i>      | 1.736  | 0.058 | 1.560  | 0.086 |
| <i>DPM1</i>      | 2.872  | 0.022 | 2.531  | 0.040 |
| <i>DPY19L3</i>   | 2.035  | 0.095 | 3.261  | 0.012 |
| <i>DQ098707</i>  | -4.080 | 0.008 | -3.781 | 0.012 |

|                        |        |       |        |       |
|------------------------|--------|-------|--------|-------|
| <i>DRD2</i>            | -2.439 | 0.014 | -1.735 | 0.069 |
| <i>DSNI</i>            | 2.697  | 0.031 | 3.451  | 0.008 |
| <i>DTX3L</i>           | 1.687  | 0.061 | 1.849  | 0.042 |
| <i>DUPD1</i>           | -1.614 | 0.041 | -1.286 | 0.097 |
| <i>DUSP1</i>           | -2.907 | 0.025 | -2.278 | 0.071 |
| <i>DUSP12</i>          | 2.632  | 0.047 | 2.676  | 0.043 |
| <i>DUSP2</i>           | -2.162 | 0.049 | -2.068 | 0.058 |
| <i>DZIP3</i>           | 3.205  | 0.028 | 2.635  | 0.064 |
| <i>EDN3</i>            | -5.101 | 0.000 | -5.016 | 0.000 |
| <i>EED</i>             | 1.396  | 0.018 | 1.691  | 0.006 |
| <i>EFCAB1</i>          | -1.759 | 0.030 | -2.162 | 0.010 |
| <i>EFHC2</i>           | -1.351 | 0.084 | -1.550 | 0.051 |
| <i>EGFL7</i>           | 2.144  | 0.035 | 2.691  | 0.011 |
| <i>EGLN3</i>           | 3.580  | 0.001 | 2.862  | 0.004 |
| <i>EGR1</i>            | -2.538 | 0.001 | -2.045 | 0.007 |
| <i>EGR2</i>            | -4.660 | 0.021 | -4.120 | 0.037 |
| <i>EIF2S2</i>          | 2.248  | 0.047 | 2.126  | 0.058 |
| <i>EIF3L</i>           | -1.771 | 0.028 | -2.168 | 0.009 |
| <i>EIF4B</i>           | -1.326 | 0.067 | -1.265 | 0.080 |
| <i>ELF5</i>            | -2.793 | 0.024 | -3.313 | 0.009 |
| <i>ELK4</i>            | -1.483 | 0.094 | -1.845 | 0.041 |
| <i>EMC7</i>            | 0.945  | 0.098 | 1.110  | 0.056 |
| <i>EMP2</i>            | 1.549  | 0.024 | 1.139  | 0.085 |
| <i>ENPP1</i>           | 2.363  | 0.072 | 2.716  | 0.041 |
| <i>ENST00000276974</i> | -1.900 | 0.004 | -2.336 | 0.001 |
| <i>ENST00000299512</i> | -1.620 | 0.025 | -1.898 | 0.011 |
| <i>ENST00000300992</i> | -2.453 | 0.014 | -3.711 | 0.001 |
| <i>ENST00000334163</i> | 2.033  | 0.025 | 2.236  | 0.015 |
| <i>ENST00000390312</i> | -3.808 | 0.011 | -3.077 | 0.034 |
| <i>ENST00000390323</i> | -4.153 | 0.065 | -5.225 | 0.024 |
| <i>ENST00000390399</i> | -2.126 | 0.010 | -1.843 | 0.022 |
| <i>ENST00000390426</i> | -1.730 | 0.043 | -1.841 | 0.032 |
| <i>ENST00000390539</i> | -6.486 | 0.000 | -5.151 | 0.000 |
| <i>ENST00000390547</i> | -6.552 | 0.001 | -7.055 | 0.001 |
| <i>ENST00000390606</i> | -2.273 | 0.059 | -2.220 | 0.065 |
| <i>ENST00000397595</i> | -1.753 | 0.089 | -1.777 | 0.085 |
| <i>ENST00000398190</i> | -0.909 | 0.094 | -1.210 | 0.031 |
| <i>ENST00000401715</i> | -1.280 | 0.019 | -1.219 | 0.025 |
| <i>ENST00000401937</i> | -1.344 | 0.058 | -1.251 | 0.076 |
| <i>ENST00000404609</i> | -1.602 | 0.009 | -1.377 | 0.021 |
| <i>ENST00000410078</i> | -4.740 | 0.030 | -5.896 | 0.009 |
| <i>ENST00000412855</i> | 2.206  | 0.053 | 2.133  | 0.060 |
| <i>ENST00000413663</i> | -1.547 | 0.082 | -1.640 | 0.066 |
| <i>ENST00000414915</i> | 1.285  | 0.083 | 1.422  | 0.057 |
| <i>ENST00000416350</i> | -1.464 | 0.072 | -1.802 | 0.030 |
| <i>ENST00000416507</i> | -1.551 | 0.051 | -1.466 | 0.063 |
| <i>ENST00000416519</i> | 1.871  | 0.074 | 2.017  | 0.056 |
| <i>ENST00000416593</i> | -1.467 | 0.085 | -2.071 | 0.019 |
| <i>ENST00000417039</i> | -1.882 | 0.069 | -1.974 | 0.058 |
| <i>ENST00000417510</i> | -1.992 | 0.018 | -2.909 | 0.001 |
| <i>ENST00000417823</i> | -1.628 | 0.096 | -1.986 | 0.047 |
| <i>ENST00000419614</i> | -1.738 | 0.014 | -1.251 | 0.066 |
| <i>ENST00000420096</i> | -2.888 | 0.023 | -3.053 | 0.017 |
| <i>ENST00000420273</i> | -1.527 | 0.041 | -1.331 | 0.071 |
| <i>ENST00000421481</i> | -1.670 | 0.042 | -1.997 | 0.017 |

|                 |        |       |        |       |
|-----------------|--------|-------|--------|-------|
| ENST00000421581 | -1.588 | 0.065 | -1.715 | 0.048 |
| ENST00000422792 | -1.427 | 0.018 | -1.693 | 0.006 |
| ENST00000424565 | -1.152 | 0.041 | -0.969 | 0.080 |
| ENST00000424633 | -1.358 | 0.019 | -1.189 | 0.037 |
| ENST00000424969 | -4.348 | 0.005 | -4.264 | 0.006 |
| ENST00000425181 | -1.723 | 0.030 | -1.987 | 0.014 |
| ENST00000425226 | 1.780  | 0.015 | 1.943  | 0.009 |
| ENST00000427962 | -1.568 | 0.037 | -1.731 | 0.023 |
| ENST00000429552 | -1.202 | 0.047 | -1.193 | 0.048 |
| ENST00000430152 | -1.882 | 0.036 | -1.774 | 0.046 |
| ENST00000430258 | -1.215 | 0.067 | -1.230 | 0.064 |
| ENST00000431782 | -1.379 | 0.027 | -1.407 | 0.025 |
| ENST00000432629 | -1.337 | 0.020 | -1.265 | 0.027 |
| ENST00000433051 | -1.875 | 0.031 | -1.897 | 0.030 |
| ENST00000434244 | 2.321  | 0.013 | 2.198  | 0.017 |
| ENST00000434710 | -3.955 | 0.009 | -3.563 | 0.017 |
| ENST00000436077 | 2.192  | 0.011 | 2.366  | 0.007 |
| ENST00000439423 | -0.874 | 0.084 | -0.924 | 0.069 |
| ENST00000441444 | -1.538 | 0.064 | -1.509 | 0.069 |
| ENST00000441465 | -1.619 | 0.057 | -1.672 | 0.050 |
| ENST00000442083 | -0.949 | 0.084 | -1.134 | 0.042 |
| ENST00000442318 | -1.442 | 0.057 | -1.286 | 0.086 |
| ENST00000443330 | -2.054 | 0.042 | -1.795 | 0.072 |
| ENST00000450820 | -2.629 | 0.008 | -2.596 | 0.009 |
| ENST00000451609 | 2.492  | 0.004 | 2.336  | 0.006 |
| ENST00000452286 | -1.728 | 0.051 | -2.123 | 0.020 |
| ENST00000452501 | -1.682 | 0.010 | -1.841 | 0.006 |
| ENST00000453166 | -2.799 | 0.046 | -3.837 | 0.009 |
| ENST00000453179 | -1.156 | 0.090 | -1.458 | 0.037 |
| ENST00000453309 | -2.409 | 0.034 | -2.906 | 0.013 |
| ENST00000453678 | -1.914 | 0.046 | -1.854 | 0.053 |
| ENST00000455206 | -1.216 | 0.036 | -1.276 | 0.029 |
| ENST00000456185 | -1.217 | 0.032 | -1.192 | 0.035 |
| ENST00000456555 | -1.078 | 0.091 | -1.411 | 0.032 |
| ENST00000457863 | 2.409  | 0.014 | 2.264  | 0.019 |
| ENST00000458293 | -1.466 | 0.080 | -1.443 | 0.085 |
| ENST00000461060 | -1.065 | 0.055 | -1.197 | 0.034 |
| ENST00000461513 | -1.221 | 0.031 | -1.670 | 0.005 |
| ENST00000462503 | -1.438 | 0.072 | -1.538 | 0.056 |
| ENST00000462693 | -2.321 | 0.006 | -1.547 | 0.049 |
| ENST00000464118 | -1.058 | 0.058 | -1.364 | 0.018 |
| ENST00000466297 | -1.263 | 0.067 | -1.428 | 0.041 |
| ENST00000469899 | -1.222 | 0.046 | -1.198 | 0.050 |
| ENST00000471205 | -1.136 | 0.071 | -1.358 | 0.034 |
| ENST00000476880 | -1.731 | 0.058 | -1.580 | 0.081 |
| ENST00000481963 | -1.193 | 0.060 | -1.038 | 0.097 |
| ENST00000483158 | -3.803 | 0.014 | -4.457 | 0.005 |
| ENST00000488396 | -1.199 | 0.044 | -1.970 | 0.002 |
| ENST00000492167 | -4.072 | 0.011 | -4.151 | 0.010 |
| ENST00000494861 | -1.411 | 0.022 | -1.174 | 0.051 |
| ENST00000496042 | -1.744 | 0.025 | -1.322 | 0.080 |
| ENST00000496488 | 3.596  | 0.004 | 2.035  | 0.077 |
| ENST00000497325 | -1.450 | 0.018 | -1.539 | 0.013 |
| ENST00000502684 | -1.756 | 0.022 | -1.698 | 0.026 |
| ENST00000503394 | -1.994 | 0.052 | -1.969 | 0.082 |

|                        |        |       |        |       |
|------------------------|--------|-------|--------|-------|
| <i>ENST00000506710</i> | -2.078 | 0.008 | -1.494 | 0.043 |
| <i>ENST00000508156</i> | -2.780 | 0.024 | -2.158 | 0.071 |
| <i>ENST00000509568</i> | -1.411 | 0.022 | -1.279 | 0.036 |
| <i>ENST00000510758</i> | -1.404 | 0.063 | -1.287 | 0.086 |
| <i>ENST00000510975</i> | -1.977 | 0.027 | -2.242 | 0.014 |
| <i>ENST00000511794</i> | -1.778 | 0.025 | -1.561 | 0.046 |
| <i>ENST00000511953</i> | -2.049 | 0.024 | -1.536 | 0.080 |
| <i>ENST00000512898</i> | -2.105 | 0.021 | -1.934 | 0.033 |
| <i>ENST00000512915</i> | 1.891  | 0.084 | 2.448  | 0.030 |
| <i>ENST00000514327</i> | -1.544 | 0.068 | -1.628 | 0.055 |
| <i>ENST00000515599</i> | 3.191  | 0.003 | 3.300  | 0.002 |
| <i>ENST00000521432</i> | 2.750  | 0.077 | 3.024  | 0.055 |
| <i>ENST00000524287</i> | -1.316 | 0.098 | -1.530 | 0.058 |
| <i>ENST00000527434</i> | 2.689  | 0.003 | 2.114  | 0.015 |
| <i>ENST00000550042</i> | -2.176 | 0.061 | -2.647 | 0.026 |
| <i>ENST00000554307</i> | -1.528 | 0.074 | -1.406 | 0.097 |
| <i>ENST00000559385</i> | -0.852 | 0.089 | -0.915 | 0.070 |
| <i>ENST00000567054</i> | -1.901 | 0.092 | -2.175 | 0.057 |
| <i>ENST00000567899</i> | -1.286 | 0.090 | -1.421 | 0.063 |
| <i>ENST00000575236</i> | -1.526 | 0.053 | -1.664 | 0.037 |
| <i>ENST00000579793</i> | 2.005  | 0.022 | 1.465  | 0.082 |
| <i>ENST00000585065</i> | 2.885  | 0.065 | 3.034  | 0.053 |
| <i>ENST00000589177</i> | 3.156  | 0.003 | 3.004  | 0.005 |
| <i>ENST00000596267</i> | 2.483  | 0.021 | 2.502  | 0.020 |
| <i>ENST00000600588</i> | -1.012 | 0.071 | -1.485 | 0.012 |
| <i>ENST00000605188</i> | 1.080  | 0.067 | 1.567  | 0.012 |
| <i>ENST00000607314</i> | -5.947 | 0.000 | -6.531 | 0.000 |
| <i>ENST00000607355</i> | 2.503  | 0.046 | 2.879  | 0.024 |
| <i>ENST00000608694</i> | 3.214  | 0.004 | 2.096  | 0.046 |
| <i>ENST00000609203</i> | -1.479 | 0.075 | -1.372 | 0.097 |
| <i>ENST00000610439</i> | -3.743 | 0.028 | -5.630 | 0.002 |
| <i>ENST00000612474</i> | -3.351 | 0.000 | -2.343 | 0.007 |
| <i>ENST00000612725</i> | -1.835 | 0.024 | -1.294 | 0.098 |
| <i>ENST00000613254</i> | 2.133  | 0.068 | 2.643  | 0.028 |
| <i>ENST00000613594</i> | -3.543 | 0.024 | -4.782 | 0.004 |
| <i>ENST00000615743</i> | 1.236  | 0.091 | 1.603  | 0.033 |
| <i>ENST00000616656</i> | -1.552 | 0.026 | -1.769 | 0.013 |
| <i>ENST00000618777</i> | -1.938 | 0.053 | -1.940 | 0.052 |
| <i>ENST00000619495</i> | -2.041 | 0.063 | -1.817 | 0.095 |
| <i>ENST00000620395</i> | -3.590 | 0.004 | -3.008 | 0.007 |
| <i>ENST00000621052</i> | 2.548  | 0.011 | 2.875  | 0.005 |
| <i>EPB41</i>           | -2.728 | 0.013 | -2.057 | 0.052 |
| <i>EPHB1</i>           | -3.636 | 0.000 | -2.528 | 0.000 |
| <i>EPST11</i>          | 2.152  | 0.029 | 1.571  | 0.099 |
| <i>ERICH5</i>          | -2.708 | 0.000 | -2.529 | 0.001 |
| <i>ERMAP</i>           | -2.161 | 0.035 | -2.643 | 0.012 |
| <i>ERMP1</i>           | 3.820  | 0.004 | 3.925  | 0.003 |
| <i>ERN2</i>            | 2.697  | 0.058 | 3.504  | 0.017 |
| <i>ESR1</i>            | 3.844  | 0.004 | 2.379  | 0.055 |
| <i>ETF1</i>            | 1.914  | 0.030 | 1.695  | 0.052 |
| <i>ETFDH</i>           | 2.367  | 0.048 | 3.473  | 0.006 |
| <i>ETNK2</i>           | 2.178  | 0.005 | 1.612  | 0.028 |
| <i>ETS2</i>            | -3.201 | 0.014 | -2.051 | 0.097 |
| <i>EXOC1</i>           | 1.947  | 0.035 | 3.249  | 0.001 |
| <i>EZR</i>             | 1.993  | 0.036 | 1.918  | 0.043 |



|                   |        |       |        |       |
|-------------------|--------|-------|--------|-------|
| <i>F11R</i>       | 1.067  | 0.090 | 1.093  | 0.083 |
| <i>F13A1</i>      | 3.636  | 0.019 | 4.639  | 0.004 |
| <i>FABP5</i>      | 2.902  | 0.062 | 2.610  | 0.090 |
| <i>FABP7</i>      | -2.037 | 0.060 | -2.264 | 0.039 |
| <i>FADD</i>       | 2.325  | 0.045 | 2.038  | 0.075 |
| <i>FAHD2A</i>     | -2.692 | 0.032 | -2.227 | 0.071 |
| <i>FAM109A</i>    | -3.613 | 0.015 | -3.259 | 0.026 |
| <i>FAM114A1</i>   | 3.723  | 0.004 | 2.812  | 0.021 |
| <i>FAM138A</i>    | -2.195 | 0.018 | -1.467 | 0.097 |
| <i>FAM160A1</i>   | -2.237 | 0.015 | -3.416 | 0.001 |
| <i>FAM189B</i>    | 3.821  | 0.002 | 3.570  | 0.003 |
| <i>FAM212A</i>    | -1.366 | 0.078 | -1.704 | 0.032 |
| <i>FAM3D</i>      | -6.058 | 0.000 | -5.426 | 0.000 |
| <i>FAM53B</i>     | -3.044 | 0.026 | -4.832 | 0.001 |
| <i>FAM53B-AS1</i> | -1.476 | 0.056 | -1.688 | 0.031 |
| <i>FAM90A27P</i>  | -1.387 | 0.072 | -1.563 | 0.045 |
| <i>FANCI</i>      | 2.428  | 0.029 | 2.807  | 0.013 |
| <i>FAP</i>        | 3.294  | 0.008 | 5.527  | 0.000 |
| <i>FARSB</i>      | 1.978  | 0.099 | 2.489  | 0.043 |
| <i>FASN</i>       | 2.399  | 0.001 | 2.138  | 0.003 |
| <i>FASTKD3</i>    | 4.482  | 0.002 | 3.124  | 0.018 |
| <i>FBXO28</i>     | 2.370  | 0.015 | 1.881  | 0.047 |
| <i>FCER1A</i>     | -3.174 | 0.026 | -3.224 | 0.024 |
| <i>FCGBP</i>      | -3.388 | 0.030 | -3.936 | 0.014 |
| <i>FCGRT</i>      | -1.864 | 0.047 | -1.576 | 0.088 |
| <i>FCRL1</i>      | -2.122 | 0.035 | -1.737 | 0.078 |
| <i>FDCSP</i>      | -3.715 | 0.030 | -3.687 | 0.031 |
| <i>FEM1C</i>      | 3.637  | 0.001 | 2.419  | 0.012 |
| <i>FERMT1</i>     | -2.009 | 0.058 | -1.750 | 0.094 |
| <i>FGF14</i>      | -3.749 | 0.003 | -2.799 | 0.019 |
| <i>FGF14-AS2</i>  | -3.034 | 0.023 | -2.815 | 0.033 |
| <i>FGF2</i>       | -3.750 | 0.000 | -4.080 | 0.000 |
| <i>FGL2</i>       | -2.261 | 0.011 | -2.408 | 0.007 |
| <i>FIGF</i>       | -2.150 | 0.068 | -2.584 | 0.032 |
| <i>FIGN</i>       | -2.064 | 0.029 | -2.534 | 0.010 |
| <i>FKBP4</i>      | 2.858  | 0.017 | 2.811  | 0.018 |
| <i>FLJ22447</i>   | 2.203  | 0.029 | 1.923  | 0.053 |
| <i>FLVCR1</i>     | 2.168  | 0.067 | 3.835  | 0.003 |
| <i>FLVCR2</i>     | -1.997 | 0.045 | -2.031 | 0.042 |
| <i>FMO2</i>       | -3.179 | 0.022 | -2.328 | 0.083 |
| <i>FNI</i>        | 6.517  | 0.000 | 7.046  | 0.000 |
| <i>FOLR1</i>      | -4.694 | 0.021 | -5.393 | 0.009 |
| <i>FOLR3</i>      | -1.793 | 0.004 | -1.250 | 0.035 |
| <i>FOSB</i>       | -3.058 | 0.063 | -4.067 | 0.017 |
| <i>FOXN3</i>      | -3.435 | 0.028 | -2.852 | 0.063 |
| <i>FRG2</i>       | -1.805 | 0.057 | -1.626 | 0.084 |
| <i>FSIP1</i>      | 2.645  | 0.038 | 4.276  | 0.002 |
| <i>FSTL3</i>      | 2.255  | 0.041 | 4.099  | 0.001 |
| <i>FUT3</i>       | 3.667  | 0.007 | 3.641  | 0.007 |
| <i>FUT8</i>       | 3.424  | 0.001 | 4.541  | 0.000 |
| <i>FYB</i>        | -2.850 | 0.013 | -4.170 | 0.001 |
| <i>FZD7</i>       | -2.923 | 0.039 | -3.386 | 0.019 |
| <i>G0S2</i>       | -5.023 | 0.000 | -5.655 | 0.000 |
| <i>GABRG1</i>     | -1.618 | 0.025 | -1.274 | 0.069 |
| <i>GABRP</i>      | -3.858 | 0.007 | -4.418 | 0.002 |

|                  |        |       |        |       |
|------------------|--------|-------|--------|-------|
| <i>GALK2</i>     | -2.351 | 0.091 | -3.413 | 0.019 |
| <i>GALNT8</i>    | -1.142 | 0.053 | -1.154 | 0.051 |
| <i>GAPDHS</i>    | -1.529 | 0.058 | -1.455 | 0.069 |
| <i>GAS2L1</i>    | -2.426 | 0.036 | -2.230 | 0.051 |
| <i>GBA</i>       | 3.187  | 0.018 | 2.308  | 0.075 |
| <i>GBGT1</i>     | -2.638 | 0.030 | -2.411 | 0.045 |
| <i>GCNT2</i>     | -1.610 | 0.014 | -1.923 | 0.004 |
| <i>GFM2</i>      | 2.799  | 0.028 | 2.908  | 0.023 |
| <i>GGH</i>       | 4.151  | 0.001 | 3.708  | 0.002 |
| <i>GGTA1P</i>    | -2.347 | 0.022 | -3.211 | 0.003 |
| <i>GINS1</i>     | 3.975  | 0.000 | 2.658  | 0.004 |
| <i>GJA1</i>      | 3.344  | 0.033 | 2.683  | 0.080 |
| <i>GJB2</i>      | 2.889  | 0.056 | 3.167  | 0.038 |
| <i>GLB1L</i>     | -2.000 | 0.070 | -2.461 | 0.030 |
| <i>GLG1</i>      | -1.616 | 0.040 | -1.737 | 0.029 |
| <i>GLIPR2</i>    | -2.693 | 0.088 | -3.124 | 0.051 |
| <i>GLT8D1</i>    | 2.473  | 0.048 | 2.411  | 0.053 |
| <i>GLTSCR2</i>   | -1.288 | 0.046 | -1.406 | 0.031 |
| <i>GLUL</i>      | 3.259  | 0.008 | 3.150  | 0.010 |
| <i>GMEB1</i>     | 2.893  | 0.034 | 2.903  | 0.033 |
| <i>GNB2L1</i>    | -1.698 | 0.027 | -1.342 | 0.072 |
| <i>GPR141</i>    | -1.239 | 0.059 | -1.643 | 0.016 |
| <i>GPR75</i>     | -2.847 | 0.048 | -4.330 | 0.005 |
| <i>GPRC5A</i>    | 6.217  | 0.000 | 5.854  | 0.000 |
| <i>GPRC5B</i>    | -5.398 | 0.002 | -6.709 | 0.000 |
| <i>GPX8</i>      | 3.758  | 0.001 | 4.538  | 0.000 |
| <i>GRAMD3</i>    | -2.804 | 0.045 | -2.707 | 0.052 |
| <i>GRB14</i>     | 6.529  | 0.011 | 4.826  | 0.050 |
| <i>GRB2</i>      | 4.053  | 0.009 | 2.952  | 0.047 |
| <i>GRIN3A</i>    | -1.427 | 0.070 | -1.794 | 0.027 |
| <i>GSAP</i>      | 3.861  | 0.023 | 2.995  | 0.070 |
| <i>GSTP1</i>     | -2.075 | 0.014 | -2.604 | 0.007 |
| <i>GTF2A1</i>    | 2.531  | 0.075 | 2.560  | 0.072 |
| <i>GTF2H2C_2</i> | 2.515  | 0.011 | 2.293  | 0.019 |
| <i>GTF3C5</i>    | -1.515 | 0.012 | -1.911 | 0.002 |
| <i>GUK1</i>      | 1.551  | 0.079 | 1.756  | 0.049 |
| <i>GUSBP5</i>    | -1.664 | 0.045 | -1.441 | 0.079 |
| <i>H2AFV</i>     | 1.775  | 0.096 | 2.215  | 0.042 |
| <i>H2AFY</i>     | 1.882  | 0.004 | 2.414  | 0.000 |
| <i>HAGH</i>      | 3.679  | 0.004 | 3.107  | 0.012 |
| <i>HAX1</i>      | 1.422  | 0.036 | 1.274  | 0.058 |
| <i>HCLS1</i>     | -3.755 | 0.011 | -4.499 | 0.003 |
| <i>HDAC3</i>     | 2.046  | 0.016 | 1.978  | 0.020 |
| <i>HDAC5</i>     | -2.477 | 0.075 | -2.468 | 0.076 |
| <i>HEATR5A</i>   | 2.453  | 0.009 | 1.637  | 0.066 |
| <i>HEPACAM2</i>  | -2.735 | 0.009 | -2.483 | 0.016 |
| <i>HHAT</i>      | 2.660  | 0.043 | 3.659  | 0.008 |
| <i>HIGD2B</i>    | -1.474 | 0.096 | -1.528 | 0.085 |
| <i>HIST1H1C</i>  | 2.882  | 0.038 | 3.985  | 0.006 |
| <i>HIST1H2A1</i> | 2.846  | 0.014 | 2.549  | 0.026 |
| <i>HIST1H2BC</i> | 1.082  | 0.082 | 1.290  | 0.042 |
| <i>HIST1H2BD</i> | 1.094  | 0.052 | 1.243  | 0.030 |
| <i>HIST1H2BI</i> | 1.471  | 0.049 | 1.852  | 0.016 |
| <i>HIST1H2BJ</i> | 1.251  | 0.030 | 1.541  | 0.010 |
| <i>HIST1H2BK</i> | 0.994  | 0.082 | 1.237  | 0.035 |

|                   |        |       |        |       |
|-------------------|--------|-------|--------|-------|
| <i>HIST1H2BL</i>  | 1.302  | 0.099 | 1.880  | 0.022 |
| <i>HIST1H2BM</i>  | 1.644  | 0.038 | 2.013  | 0.014 |
| <i>HIST1H3B</i>   | 2.651  | 0.027 | 2.864  | 0.018 |
| <i>HIST1H3H</i>   | 1.752  | 0.035 | 2.246  | 0.009 |
| <i>HIST1H3J</i>   | 2.958  | 0.045 | 2.490  | 0.086 |
| <i>HIST2H2AA4</i> | 2.281  | 0.071 | 2.834  | 0.029 |
| <i>HIST2H2AB</i>  | 1.107  | 0.048 | 1.631  | 0.006 |
| <i>HIST2H2AC</i>  | 1.291  | 0.069 | 1.387  | 0.053 |
| <i>HIST2H2BF</i>  | 1.472  | 0.041 | 1.640  | 0.025 |
| <i>HJURP</i>      | 3.100  | 0.054 | 2.748  | 0.083 |
| <i>HLF</i>        | -5.713 | 0.006 | -4.342 | 0.028 |
| <i>HMGB2</i>      | 1.748  | 0.029 | 1.691  | 0.034 |
| <i>HMGB3</i>      | 5.350  | 0.000 | 4.831  | 0.000 |
| <i>HMGB3P1</i>    | 2.657  | 0.009 | 2.486  | 0.013 |
| <i>HMMR</i>       | 4.244  | 0.005 | 3.891  | 0.008 |
| <i>HN1L</i>       | 1.796  | 0.009 | 1.933  | 0.006 |
| <i>HOTAIRM1</i>   | -4.547 | 0.000 | -4.162 | 0.000 |
| <i>HOXA2</i>      | -2.734 | 0.001 | -2.466 | 0.001 |
| <i>HOXA3</i>      | -4.818 | 0.003 | -4.609 | 0.004 |
| <i>HOXA7</i>      | -2.130 | 0.047 | -1.933 | 0.069 |
| <i>HOXC6</i>      | 4.115  | 0.012 | 2.970  | 0.057 |
| <i>HSD17B3</i>    | -1.281 | 0.075 | -1.527 | 0.037 |
| <i>HSPA13</i>     | 1.788  | 0.041 | 2.064  | 0.021 |
| <i>HSPA14</i>     | 3.079  | 0.014 | 2.332  | 0.053 |
| <i>HSPA4</i>      | 2.495  | 0.033 | 2.290  | 0.048 |
| <i>HSPA8</i>      | 1.089  | 0.085 | 1.233  | 0.054 |
| <i>HSPB1</i>      | 1.613  | 0.018 | 2.186  | 0.003 |
| <i>HULC</i>       | -2.077 | 0.035 | -2.083 | 0.035 |
| <i>HYDIN</i>      | -2.838 | 0.042 | -3.054 | 0.030 |
| <i>IARS2</i>      | 1.963  | 0.051 | 1.900  | 0.058 |
| <i>ID4</i>        | -3.515 | 0.033 | -3.183 | 0.051 |
| <i>IDS</i>        | 1.964  | 0.092 | 2.519  | 0.035 |
| <i>IFFO2</i>      | -5.354 | 0.001 | -4.135 | 0.008 |
| <i>IFI27</i>      | 4.121  | 0.000 | 3.901  | 0.000 |
| <i>IFI6</i>       | 1.903  | 0.091 | 2.464  | 0.033 |
| <i>IGFBP5</i>     | 3.532  | 0.002 | 3.354  | 0.003 |
| <i>IGFBP6</i>     | -2.849 | 0.026 | -2.815 | 0.028 |
| <i>IGJ</i>        | -6.064 | 0.002 | -5.598 | 0.004 |
| <i>IGLL1</i>      | -4.961 | 0.014 | -6.183 | 0.003 |
| <i>IGLL5</i>      | -4.822 | 0.019 | -5.743 | 0.007 |
| <i>IL10RB-AS1</i> | -3.571 | 0.006 | -3.745 | 0.004 |
| <i>IL13RA1</i>    | 1.883  | 0.037 | 2.077  | 0.023 |
| <i>IL17RD</i>     | -2.874 | 0.073 | -2.851 | 0.075 |
| <i>IL22RA1</i>    | -1.830 | 0.050 | -1.515 | 0.098 |
| <i>IMPAD1</i>     | 2.244  | 0.004 | 1.698  | 0.024 |
| <i>INAFM1</i>     | 3.515  | 0.003 | 4.587  | 0.000 |
| <i>INAFM2</i>     | -2.447 | 0.078 | -2.784 | 0.048 |
| <i>INHBA</i>      | 1.685  | 0.036 | 3.173  | 0.001 |
| <i>INTS6</i>      | 3.364  | 0.009 | 2.971  | 0.018 |
| <i>IPO13</i>      | 2.522  | 0.064 | 2.343  | 0.083 |
| <i>IPPK</i>       | 3.776  | 0.017 | 3.360  | 0.031 |
| <i>IQCA1</i>      | -2.748 | 0.007 | -2.458 | 0.013 |
| <i>IQSEC3</i>     | -1.683 | 0.047 | -2.189 | 0.013 |
| <i>IRF3</i>       | 2.358  | 0.045 | 2.426  | 0.039 |
| <i>IRX1</i>       | -4.662 | 0.001 | -7.259 | 0.000 |

|                   |        |       |        |       |
|-------------------|--------|-------|--------|-------|
| <i>IRX4</i>       | -3.933 | 0.015 | -4.785 | 0.004 |
| <i>ISM1</i>       | -4.617 | 0.000 | -5.717 | 0.000 |
| <i>ISY1-RAB43</i> | -2.462 | 0.021 | -2.836 | 0.009 |
| <i>ITGAV</i>      | 1.765  | 0.042 | 1.548  | 0.070 |
| <i>ITGB1BP1</i>   | 2.093  | 0.062 | 2.096  | 0.061 |
| <i>ITGB3BP</i>    | 2.286  | 0.045 | 2.110  | 0.062 |
| <i>ITM2A</i>      | -3.462 | 0.001 | -4.521 | 0.000 |
| <i>ITPA</i>       | -2.466 | 0.023 | -1.728 | 0.097 |
| <i>IWS1</i>       | 3.510  | 0.028 | 4.465  | 0.007 |
| <i>JMJD7</i>      | -1.715 | 0.012 | -1.167 | 0.074 |
| <i>JPH2</i>       | -2.303 | 0.053 | -3.035 | 0.014 |
| <i>KANK1</i>      | -2.877 | 0.061 | -4.627 | 0.005 |
| <i>KANK2</i>      | 3.306  | 0.031 | 4.005  | 0.011 |
| <i>KAZALD1</i>    | 2.383  | 0.088 | 4.134  | 0.006 |
| <i>KBTBD6</i>     | -2.913 | 0.014 | -2.251 | 0.049 |
| <i>KCNH8</i>      | -1.672 | 0.006 | -1.847 | 0.003 |
| <i>KCNIP3</i>     | -1.493 | 0.012 | -1.398 | 0.018 |
| <i>KCNJ8</i>      | -4.067 | 0.000 | -4.865 | 0.000 |
| <i>KCNK1</i>      | 2.590  | 0.013 | 2.286  | 0.026 |
| <i>KCNK15</i>     | 3.100  | 0.004 | 3.223  | 0.003 |
| <i>KCNK16</i>     | -1.208 | 0.096 | -1.202 | 0.098 |
| <i>KCNK5</i>      | -3.230 | 0.039 | -2.697 | 0.079 |
| <i>KCNN4</i>      | -4.298 | 0.006 | -3.610 | 0.017 |
| <i>KCTD12</i>     | -2.463 | 0.011 | -1.955 | 0.036 |
| <i>KCTD14</i>     | -4.498 | 0.000 | -4.619 | 0.000 |
| <i>KDM5B</i>      | 1.658  | 0.059 | 1.955  | 0.029 |
| <i>KHNYN</i>      | -2.660 | 0.067 | -3.544 | 0.019 |
| <i>KIAA0101</i>   | 4.516  | 0.001 | 4.293  | 0.001 |
| <i>KIAA0196</i>   | 1.947  | 0.074 | 2.167  | 0.049 |
| <i>KIF14</i>      | 3.874  | 0.060 | 3.422  | 0.093 |
| <i>KIF25</i>      | -2.366 | 0.053 | -2.671 | 0.031 |
| <i>KIT</i>        | -4.153 | 0.000 | -7.598 | 0.000 |
| <i>KLHL13</i>     | -2.410 | 0.037 | -3.886 | 0.002 |
| <i>KLHL14</i>     | 1.386  | 0.034 | 1.870  | 0.006 |
| <i>KLHL21</i>     | -2.881 | 0.056 | -3.960 | 0.012 |
| <i>KLHL7</i>      | -1.814 | 0.084 | -3.311 | 0.004 |
| <i>KLK7</i>       | -2.966 | 0.019 | -2.802 | 0.026 |
| <i>KLK8</i>       | -2.240 | 0.034 | -4.611 | 0.000 |
| <i>KLRB1</i>      | -3.087 | 0.006 | -3.111 | 0.006 |
| <i>KLRC3</i>      | -2.124 | 0.025 | -2.377 | 0.014 |
| <i>KPNA2</i>      | 1.922  | 0.041 | 2.760  | 0.006 |
| <i>KPNB1</i>      | 1.769  | 0.032 | 1.760  | 0.033 |
| <i>KRT13</i>      | -4.652 | 0.000 | -3.281 | 0.006 |
| <i>KRT14</i>      | -3.254 | 0.011 | -4.327 | 0.002 |
| <i>KRT15</i>      | -6.310 | 0.001 | -6.971 | 0.000 |
| <i>KRT17P5</i>    | -1.650 | 0.077 | -1.637 | 0.079 |
| <i>KRT19</i>      | 1.532  | 0.029 | 1.702  | 0.017 |
| <i>KRT19P2</i>    | 1.470  | 0.099 | 1.559  | 0.083 |
| <i>KRT5</i>       | -3.557 | 0.012 | -4.124 | 0.005 |
| <i>KRT8</i>       | 1.334  | 0.027 | 1.728  | 0.006 |
| <i>KRT8P12</i>    | 1.483  | 0.022 | 2.016  | 0.003 |
| <i>KRTAP6-3</i>   | -1.852 | 0.098 | -2.179 | 0.055 |
| <i>L3HYPDH</i>    | 2.652  | 0.040 | 2.902  | 0.027 |
| <i>LAGE3</i>      | 1.805  | 0.081 | 1.698  | 0.099 |
| <i>LAMA3</i>      | -3.169 | 0.089 | -3.579 | 0.057 |

|                     |        |       |        |       |
|---------------------|--------|-------|--------|-------|
| <i>LARPIB</i>       | 3.046  | 0.031 | 3.032  | 0.032 |
| <i>LARP6</i>        | -1.648 | 0.093 | -1.928 | 0.053 |
| <i>LAYN</i>         | -2.229 | 0.039 | -2.293 | 0.034 |
| <i>LBR</i>          | 3.657  | 0.015 | 3.521  | 0.019 |
| <i>LDHB</i>         | -3.603 | 0.024 | -3.647 | 0.022 |
| <i>LEF1</i>         | 4.216  | 0.009 | 4.025  | 0.012 |
| <i>LFNG</i>         | 3.980  | 0.007 | 3.003  | 0.034 |
| <i>LGALS9</i>       | 3.325  | 0.003 | 2.110  | 0.042 |
| <i>LGR6</i>         | -2.889 | 0.028 | -4.666 | 0.001 |
| <i>LHFPL4</i>       | -2.842 | 0.004 | -2.930 | 0.003 |
| <i>LIMK2</i>        | -3.000 | 0.016 | -5.288 | 0.000 |
| <i>LIN9</i>         | 4.072  | 0.033 | 4.186  | 0.029 |
| <i>LINC00086</i>    | -2.084 | 0.053 | -2.864 | 0.011 |
| <i>LINC00152</i>    | 2.110  | 0.023 | 2.445  | 0.010 |
| <i>LINC00240</i>    | -2.121 | 0.029 | -2.374 | 0.016 |
| <i>LINC00298</i>    | 1.541  | 0.086 | 1.830  | 0.045 |
| <i>LINC00515</i>    | -2.597 | 0.087 | -2.558 | 0.091 |
| <i>LINC00842</i>    | -2.034 | 0.042 | -2.119 | 0.035 |
| <i>LINC00865</i>    | -2.723 | 0.018 | -2.708 | 0.019 |
| <i>LINC01000</i>    | -1.260 | 0.099 | -2.195 | 0.007 |
| <i>LINC01152</i>    | -3.773 | 0.003 | -3.239 | 0.009 |
| <i>LINC01235</i>    | -2.532 | 0.028 | -2.998 | 0.011 |
| <i>LINC01270</i>    | 2.407  | 0.056 | 2.281  | 0.068 |
| <i>LIPG</i>         | -1.589 | 0.022 | -1.625 | 0.020 |
| <i>LMCD1</i>        | 5.390  | 0.000 | 6.042  | 0.000 |
| <i>LOC100130152</i> | 1.950  | 0.025 | 2.156  | 0.014 |
| <i>LOC100130232</i> | -1.329 | 0.063 | -1.322 | 0.064 |
| <i>LOC100130540</i> | -1.873 | 0.029 | -1.608 | 0.056 |
| <i>LOC100130560</i> | -2.452 | 0.017 | -3.060 | 0.004 |
| <i>LOC100130899</i> | -3.231 | 0.005 | -2.680 | 0.016 |
| <i>LOC100131907</i> | -2.614 | 0.016 | -2.509 | 0.020 |
| <i>LOC100134423</i> | -1.654 | 0.036 | -2.033 | 0.013 |
| <i>LOC100287477</i> | -2.013 | 0.056 | -2.700 | 0.014 |
| <i>LOC100288619</i> | -1.263 | 0.048 | -1.340 | 0.037 |
| <i>LOC100505923</i> | -2.511 | 0.012 | -2.568 | 0.011 |
| <i>LOC100506314</i> | -1.646 | 0.046 | -2.120 | 0.013 |
| <i>LOC100506411</i> | 2.372  | 0.016 | 1.905  | 0.047 |
| <i>LOC100506674</i> | 5.205  | 0.001 | 3.913  | 0.010 |
| <i>LOC100506827</i> | -1.602 | 0.026 | -1.662 | 0.022 |
| <i>LOC100507131</i> | -1.885 | 0.015 | -1.750 | 0.023 |
| <i>LOC100507291</i> | 1.717  | 0.099 | 1.731  | 0.097 |
| <i>LOC100507599</i> | -1.968 | 0.031 | -1.621 | 0.070 |
| <i>LOC100652768</i> | -2.494 | 0.021 | -2.293 | 0.032 |
| <i>LOC100996535</i> | -1.937 | 0.075 | -1.813 | 0.094 |
| <i>LOC101926934</i> | -1.651 | 0.023 | -1.531 | 0.033 |
| <i>LOC101927322</i> | -1.802 | 0.046 | -2.040 | 0.026 |
| <i>LOC101927331</i> | -1.871 | 0.065 | -2.164 | 0.036 |
| <i>LOC101927354</i> | -1.522 | 0.044 | -1.329 | 0.074 |
| <i>LOC101927389</i> | -1.603 | 0.057 | -1.461 | 0.080 |
| <i>LOC101927584</i> | -1.293 | 0.068 | -1.205 | 0.086 |
| <i>LOC101927770</i> | 2.588  | 0.088 | 3.045  | 0.048 |
| <i>LOC101928201</i> | -1.581 | 0.019 | -1.495 | 0.025 |
| <i>LOC101928347</i> | -1.061 | 0.067 | -1.256 | 0.033 |
| <i>LOC101928413</i> | 1.961  | 0.026 | 1.734  | 0.045 |
| <i>LOC101928659</i> | 1.926  | 0.084 | 2.596  | 0.024 |

|                     |        |       |        |       |
|---------------------|--------|-------|--------|-------|
| <i>LOC101928865</i> | 1.762  | 0.060 | 1.808  | 0.054 |
| <i>LOC101929128</i> | -1.874 | 0.078 | -2.323 | 0.033 |
| <i>LOC101929181</i> | -1.693 | 0.079 | -1.717 | 0.076 |
| <i>LOC101929231</i> | -2.270 | 0.036 | -1.742 | 0.098 |
| <i>LOC101929998</i> | -2.250 | 0.072 | -3.805 | 0.005 |
| <i>LOC102723428</i> | 2.181  | 0.009 | 1.537  | 0.052 |
| <i>LOC102723505</i> | -6.450 | 0.000 | -6.291 | 0.000 |
| <i>LOC102723765</i> | -1.788 | 0.046 | -1.941 | 0.032 |
| <i>LOC102723854</i> | -2.744 | 0.001 | -3.526 | 0.000 |
| <i>LOC102723882</i> | -1.863 | 0.035 | -1.716 | 0.050 |
| <i>LOC102723920</i> | -3.106 | 0.011 | -2.595 | 0.029 |
| <i>LOC102724505</i> | -1.509 | 0.036 | -1.310 | 0.064 |
| <i>LOC102725242</i> | -1.399 | 0.084 | -1.378 | 0.088 |
| <i>LOC102725394</i> | -3.038 | 0.031 | -4.622 | 0.002 |
| <i>LOC102800447</i> | -2.212 | 0.008 | -2.296 | 0.006 |
| <i>LOC154761</i>    | -2.711 | 0.016 | -2.561 | 0.021 |
| <i>LOC283299</i>    | -1.653 | 0.054 | -1.960 | 0.025 |
| <i>LOC339988</i>    | -1.133 | 0.099 | -2.037 | 0.006 |
| <i>LOC340017</i>    | -2.239 | 0.042 | -2.045 | 0.060 |
| <i>LOC388242</i>    | -2.389 | 0.004 | -2.690 | 0.001 |
| <i>LOC401287</i>    | -2.472 | 0.060 | -2.281 | 0.080 |
| <i>LOC401296</i>    | -1.499 | 0.073 | -1.869 | 0.029 |
| <i>LOC440300</i>    | 2.189  | 0.097 | 2.878  | 0.034 |
| <i>LOC541473</i>    | -2.646 | 0.044 | -2.634 | 0.045 |
| <i>LOC643454</i>    | 1.896  | 0.024 | 1.664  | 0.044 |
| <i>LOC643733</i>    | -2.994 | 0.008 | -2.813 | 0.011 |
| <i>LOC644070</i>    | -1.788 | 0.054 | -2.139 | 0.024 |
| <i>LOC644919</i>    | -1.833 | 0.035 | -1.895 | 0.030 |
| <i>LOC645188</i>    | -1.713 | 0.029 | -1.274 | 0.093 |
| <i>LOC728040</i>    | -1.271 | 0.090 | -1.435 | 0.059 |
| <i>LOC729047</i>    | -2.165 | 0.011 | -2.208 | 0.010 |
| <i>LOC93432</i>     | -1.738 | 0.017 | -1.830 | 0.013 |
| <i>LOXL3</i>        | 2.823  | 0.051 | 2.868  | 0.048 |
| <i>LPCAT1</i>       | 3.811  | 0.007 | 2.632  | 0.049 |
| <i>LRFN1</i>        | -2.556 | 0.075 | -2.659 | 0.065 |
| <i>LRG1</i>         | 3.790  | 0.064 | 3.703  | 0.070 |
| <i>LRRC42</i>       | 2.179  | 0.058 | 2.293  | 0.048 |
| <i>LRRC56</i>       | 3.013  | 0.025 | 3.032  | 0.025 |
| <i>LRRFIP1</i>      | 1.868  | 0.095 | 2.660  | 0.022 |
| <i>LRRN2</i>        | 2.718  | 0.071 | 2.985  | 0.049 |
| <i>LRRN4CL</i>      | 3.000  | 0.041 | 3.525  | 0.019 |
| <i>LRRTM4</i>       | -1.718 | 0.095 | -1.732 | 0.093 |
| <i>LTB</i>          | -3.045 | 0.011 | -2.651 | 0.023 |
| <i>LTBP1</i>        | 4.948  | 0.005 | 3.402  | 0.042 |
| <i>LTBP2</i>        | -2.676 | 0.041 | -2.126 | 0.096 |
| <i>LUC7L2</i>       | -2.566 | 0.011 | -2.435 | 0.015 |
| <i>LUM</i>          | 3.865  | 0.004 | 4.755  | 0.001 |
| <i>LUZP2</i>        | -3.344 | 0.008 | -2.436 | 0.044 |
| <i>LY75</i>         | -4.050 | 0.014 | -4.853 | 0.004 |
| <i>LY9</i>          | 1.812  | 0.024 | 1.518  | 0.054 |
| <i>LYN</i>          | -3.238 | 0.008 | -2.883 | 0.017 |
| <i>LYPD6</i>        | -2.492 | 0.054 | -3.103 | 0.020 |
| <i>LYRM9</i>        | -4.852 | 0.003 | -3.363 | 0.030 |
| <i>MAB21L1</i>      | -1.386 | 0.040 | -1.088 | 0.099 |
| <i>MAG</i>          | -1.763 | 0.057 | -1.646 | 0.074 |

|                  |        |       |        |       |
|------------------|--------|-------|--------|-------|
| <i>MAG11</i>     | -3.338 | 0.059 | -4.007 | 0.027 |
| <i>MAG12-AS3</i> | -2.461 | 0.049 | -3.263 | 0.012 |
| <i>MAL2</i>      | 2.327  | 0.019 | 1.946  | 0.045 |
| <i>MAML3</i>     | -3.152 | 0.078 | -3.328 | 0.064 |
| <i>MAP2K6</i>    | -2.630 | 0.016 | -4.515 | 0.000 |
| <i>MAP3K12</i>   | 2.365  | 0.026 | 1.966  | 0.058 |
| <i>MAPK9</i>     | 2.469  | 0.046 | 3.256  | 0.011 |
| <i>MAPKAPK2</i>  | 1.478  | 0.076 | 1.558  | 0.063 |
| <i>MAST4</i>     | 2.228  | 0.098 | 3.520  | 0.013 |
| <i>MASTL</i>     | 3.283  | 0.049 | 3.579  | 0.034 |
| <i>MATN2</i>     | -5.135 | 0.001 | -4.883 | 0.001 |
| <i>MBNL1-AS1</i> | -1.551 | 0.062 | -1.488 | 0.073 |
| <i>MED20</i>     | 1.701  | 0.061 | 1.824  | 0.046 |
| <i>MED27</i>     | -1.763 | 0.050 | -2.095 | 0.023 |
| <i>MEN1</i>      | 2.291  | 0.049 | 2.187  | 0.059 |
| <i>MESP1</i>     | -2.444 | 0.018 | -1.945 | 0.052 |
| <i>METTL10</i>   | 1.855  | 0.042 | 1.864  | 0.042 |
| <i>METTL7A</i>   | -1.789 | 0.083 | -3.296 | 0.004 |
| <i>MFI2</i>      | -2.873 | 0.023 | -3.043 | 0.017 |
| <i>MIA</i>       | -4.018 | 0.007 | -7.409 | 0.000 |
| <i>MID1</i>      | -2.831 | 0.018 | -2.419 | 0.038 |
| <i>MIEF1</i>     | -2.549 | 0.033 | -2.315 | 0.050 |
| <i>MIR100HG</i>  | -3.264 | 0.078 | -3.329 | 0.073 |
| <i>MIR31HG</i>   | -2.201 | 0.040 | -2.299 | 0.033 |
| <i>MIR3916</i>   | 2.218  | 0.033 | 2.143  | 0.039 |
| <i>MIR503HG</i>  | 1.585  | 0.040 | 1.762  | 0.024 |
| <i>MITD1</i>     | 3.063  | 0.005 | 2.148  | 0.036 |
| <i>MMD</i>       | 2.609  | 0.060 | 2.589  | 0.061 |
| <i>MME</i>       | -4.328 | 0.002 | -4.214 | 0.002 |
| <i>MMP1</i>      | 3.555  | 0.006 | 2.363  | 0.051 |
| <i>MMP11</i>     | 3.624  | 0.016 | 4.978  | 0.002 |
| <i>MMP7</i>      | -5.326 | 0.010 | -7.057 | 0.001 |
| <i>MOAP1</i>     | 2.932  | 0.003 | 1.727  | 0.058 |
| <i>MOB3B</i>     | -3.320 | 0.007 | -2.399 | 0.040 |
| <i>MPC2</i>      | 2.695  | 0.007 | 2.794  | 0.005 |
| <i>MPHOSPH10</i> | 2.878  | 0.029 | 2.968  | 0.025 |
| <i>MRAS</i>      | -2.697 | 0.014 | -3.013 | 0.007 |
| <i>MRGBP</i>     | 2.332  | 0.022 | 3.087  | 0.004 |
| <i>MRPL27</i>    | 2.202  | 0.039 | 2.686  | 0.014 |
| <i>MRPL28</i>    | 2.978  | 0.068 | 3.103  | 0.058 |
| <i>MRPL47</i>    | 3.378  | 0.015 | 2.779  | 0.040 |
| <i>MRPL55</i>    | 1.307  | 0.036 | 1.632  | 0.011 |
| <i>MRPS30</i>    | 3.293  | 0.025 | 2.589  | 0.069 |
| <i>MRVII</i>     | 1.848  | 0.089 | 3.023  | 0.009 |
| <i>MRVII-AS1</i> | -2.012 | 0.086 | -1.967 | 0.093 |
| <i>MSI1</i>      | -2.687 | 0.067 | -2.823 | 0.056 |
| <i>MSL3P1</i>    | -2.547 | 0.007 | -1.548 | 0.082 |
| <i>MSMB</i>      | 6.000  | 0.000 | 4.127  | 0.004 |
| <i>MSRA</i>      | -2.854 | 0.044 | -4.766 | 0.002 |
| <i>MSRB1</i>     | 1.745  | 0.096 | 2.249  | 0.036 |
| <i>MST1R</i>     | 2.434  | 0.050 | 3.825  | 0.004 |
| <i>MSTO1</i>     | 2.022  | 0.075 | 1.898  | 0.093 |
| <i>MT1A</i>      | -1.642 | 0.034 | -1.834 | 0.019 |
| <i>MT1E</i>      | -2.409 | 0.005 | -2.817 | 0.002 |
| <i>MT1G</i>      | -2.193 | 0.020 | -4.823 | 0.000 |

|                 |        |       |        |       |
|-----------------|--------|-------|--------|-------|
| <i>MT1HL1</i>   | -1.796 | 0.040 | -2.219 | 0.014 |
| <i>MT1L</i>     | -1.799 | 0.018 | -1.890 | 0.014 |
| <i>MT1M</i>     | -3.188 | 0.010 | -5.596 | 0.000 |
| <i>MT1X</i>     | -1.867 | 0.038 | -2.650 | 0.005 |
| <i>MTA1</i>     | 3.820  | 0.009 | 3.030  | 0.031 |
| <i>MTF2</i>     | 2.787  | 0.033 | 2.715  | 0.037 |
| <i>MTX1</i>     | 1.831  | 0.054 | 1.617  | 0.085 |
| <i>MUC1</i>     | 2.313  | 0.003 | 2.098  | 0.006 |
| <i>MUC15</i>    | -3.744 | 0.004 | -3.086 | 0.015 |
| <i>MUC7</i>     | -2.685 | 0.045 | -2.275 | 0.084 |
| <i>MUTYH</i>    | 2.956  | 0.032 | 3.573  | 0.012 |
| <i>MVB12B</i>   | -2.918 | 0.050 | -3.041 | 0.042 |
| <i>MYC</i>      | -3.178 | 0.006 | -4.012 | 0.001 |
| <i>MYCBP</i>    | 2.809  | 0.005 | 2.351  | 0.015 |
| <i>MYL5</i>     | -1.732 | 0.036 | -1.547 | 0.058 |
| <i>MYLK</i>     | -1.545 | 0.028 | -2.371 | 0.002 |
| <i>NAA10</i>    | 2.254  | 0.049 | 2.996  | 0.012 |
| <i>NAGK</i>     | 1.545  | 0.065 | 1.394  | 0.093 |
| <i>NAP1L2</i>   | -2.435 | 0.011 | -2.335 | 0.013 |
| <i>NARF</i>     | 2.231  | 0.067 | 2.647  | 0.033 |
| <i>NAT1</i>     | 5.978  | 0.000 | 5.657  | 0.000 |
| <i>NAT2</i>     | 3.481  | 0.013 | 2.360  | 0.077 |
| <i>NBPF10</i>   | 1.401  | 0.012 | 1.216  | 0.025 |
| <i>NBPF6</i>    | 3.111  | 0.064 | 4.094  | 0.019 |
| <i>NBPF9</i>    | 1.590  | 0.035 | 1.331  | 0.071 |
| <i>NCALD</i>    | -4.083 | 0.006 | -4.878 | 0.002 |
| <i>NCKAP1L</i>  | -1.724 | 0.027 | -1.737 | 0.026 |
| <i>NCMAP</i>    | -2.374 | 0.009 | -5.249 | 0.000 |
| <i>NDFI1</i>    | 1.857  | 0.051 | 2.421  | 0.014 |
| <i>NDRG2</i>    | -2.820 | 0.041 | -4.245 | 0.004 |
| <i>NDUFAB1</i>  | 2.075  | 0.060 | 2.871  | 0.013 |
| <i>NDUFB6</i>   | 2.949  | 0.021 | 3.260  | 0.012 |
| <i>NEDD4L</i>   | -3.474 | 0.006 | -2.434 | 0.042 |
| <i>NEILI</i>    | -2.997 | 0.043 | -3.746 | 0.014 |
| <i>NENF</i>     | 1.173  | 0.067 | 1.270  | 0.049 |
| <i>NES</i>      | -3.898 | 0.013 | -3.764 | 0.016 |
| <i>NEURL3</i>   | -4.162 | 0.005 | -4.825 | 0.002 |
| <i>NFIB</i>     | -2.820 | 0.003 | -3.567 | 0.000 |
| <i>NIPSNAP1</i> | 1.523  | 0.063 | 2.190  | 0.011 |
| <i>NOTCH4</i>   | -2.151 | 0.072 | -2.749 | 0.025 |
| <i>NPAT</i>     | -2.099 | 0.043 | -2.368 | 0.025 |
| <i>NPNT</i>     | 2.452  | 0.088 | 3.527  | 0.019 |
| <i>NPRL3</i>    | 1.845  | 0.075 | 2.630  | 0.015 |
| <i>NR3C1</i>    | -1.222 | 0.080 | -1.546 | 0.031 |
| <i>NT5DC3</i>   | -1.824 | 0.058 | 1.652  | 0.083 |
| <i>NTRK3</i>    | -2.014 | 0.064 | -1.876 | 0.083 |
| <i>NUCKS1</i>   | 1.510  | 0.027 | 1.498  | 0.029 |
| <i>NUDT5</i>    | 1.942  | 0.093 | 1.978  | 0.088 |
| <i>NUDT6</i>    | -5.234 | 0.000 | -4.603 | 0.000 |
| <i>NUDT9P1</i>  | -4.438 | 0.004 | -3.635 | 0.013 |
| <i>NUF2</i>     | 2.650  | 0.029 | 2.201  | 0.064 |
| <i>NUP37</i>    | 2.224  | 0.023 | 2.277  | 0.020 |
| <i>NUSAP1</i>   | 3.581  | 0.006 | 3.146  | 0.014 |
| <i>NVL</i>      | 3.505  | 0.031 | 3.812  | 0.020 |
| <i>OGFRL1</i>   | -2.256 | 0.078 | -3.132 | 0.018 |



|                |        |       |        |       |
|----------------|--------|-------|--------|-------|
| <i>OR10AD1</i> | -1.305 | 0.097 | -1.473 | 0.064 |
| <i>OR12D2</i>  | -1.564 | 0.028 | -1.416 | 0.044 |
| <i>OR1L3</i>   | -1.780 | 0.048 | -1.495 | 0.092 |
| <i>OXTR</i>    | -2.684 | 0.028 | -3.224 | 0.011 |
| <i>P2RY12</i>  | -2.017 | 0.062 | -1.853 | 0.084 |
| <i>PADI2</i>   | -3.253 | 0.011 | -3.584 | 0.006 |
| <i>PAK7</i>    | -2.789 | 0.006 | -2.007 | 0.038 |
| <i>PALMD</i>   | -2.618 | 0.067 | -3.681 | 0.014 |
| <i>PANK2</i>   | 3.052  | 0.024 | 2.271  | 0.083 |
| <i>PARD6B</i>  | 2.962  | 0.012 | 2.052  | 0.069 |
| <i>PARP14</i>  | 1.657  | 0.030 | 1.840  | 0.018 |
| <i>PBK</i>     | 2.717  | 0.055 | 3.042  | 0.034 |
| <i>PCDH15</i>  | -3.304 | 0.030 | -2.930 | 0.051 |
| <i>PCDHB4</i>  | -2.729 | 0.040 | -2.383 | 0.069 |
| <i>PDCD5</i>   | 1.429  | 0.077 | 1.467  | 0.070 |
| <i>PDE8A</i>   | 3.003  | 0.013 | 2.378  | 0.042 |
| <i>PDGFA</i>   | -2.087 | 0.089 | -4.582 | 0.001 |
| <i>PDGFRA</i>  | -3.439 | 0.003 | -3.246 | 0.005 |
| <i>PDK4</i>    | -3.981 | 0.003 | -5.753 | 0.000 |
| <i>PDLIM3</i>  | -3.019 | 0.038 | -2.464 | 0.084 |
| <i>PDP1</i>    | 2.148  | 0.007 | 1.638  | 0.033 |
| <i>PER1</i>    | -2.469 | 0.034 | -3.249 | 0.008 |
| <i>PGAM1</i>   | 2.224  | 0.011 | 1.486  | 0.072 |
| <i>PHF1</i>    | -2.060 | 0.043 | -3.575 | 0.002 |
| <i>PHF13</i>   | -2.134 | 0.055 | -2.914 | 0.012 |
| <i>PHLDA1</i>  | -3.000 | 0.004 | -3.334 | 0.002 |
| <i>PII5</i>    | -5.018 | 0.001 | -6.295 | 0.000 |
| <i>PI4K2A</i>  | -2.685 | 0.053 | -2.274 | 0.095 |
| <i>PICK1</i>   | -2.829 | 0.005 | -3.071 | 0.003 |
| <i>PIGC</i>    | 2.301  | 0.042 | 2.228  | 0.049 |
| <i>PIGN</i>    | 2.101  | 0.029 | 2.799  | 0.005 |
| <i>PIGR</i>    | -7.006 | 0.002 | -7.964 | 0.001 |
| <i>PIK3C3</i>  | 2.996  | 0.058 | 3.128  | 0.048 |
| <i>PIK3CG</i>  | -2.533 | 0.090 | -2.523 | 0.091 |
| <i>PINLYP</i>  | -3.862 | 0.000 | -4.034 | 0.000 |
| <i>PITX1</i>   | 2.851  | 0.058 | 3.699  | 0.018 |
| <i>PKD1P6</i>  | 3.863  | 0.010 | 2.571  | 0.070 |
| <i>PKN3</i>    | -2.108 | 0.097 | -2.642 | 0.042 |
| <i>PLA2G6</i>  | -1.691 | 0.096 | -2.569 | 0.016 |
| <i>PLAGL1</i>  | -3.288 | 0.001 | -1.741 | 0.056 |
| <i>PLCD1</i>   | -2.173 | 0.098 | -2.821 | 0.036 |
| <i>PLCH1</i>   | -1.734 | 0.046 | -1.762 | 0.043 |
| <i>PLEKHM3</i> | -2.201 | 0.090 | -4.884 | 0.001 |
| <i>PLK1</i>    | 2.831  | 0.034 | 2.471  | 0.089 |
| <i>PLOD2</i>   | 3.300  | 0.001 | 2.716  | 0.003 |
| <i>PLS3</i>    | -2.049 | 0.048 | -1.928 | 0.062 |
| <i>PMAIP1</i>  | 2.678  | 0.038 | 2.172  | 0.086 |
| <i>PMF1</i>    | 2.556  | 0.044 | 2.466  | 0.051 |
| <i>PMPCA</i>   | -2.124 | 0.064 | -2.049 | 0.073 |
| <i>PMS2L2</i>  | 2.381  | 0.051 | 2.240  | 0.064 |
| <i>PMVK</i>    | 2.974  | 0.052 | 2.521  | 0.095 |
| <i>PNPLA7</i>  | -2.027 | 0.036 | -1.841 | 0.054 |
| <i>PNRC1</i>   | -1.695 | 0.030 | -2.027 | 0.012 |
| <i>PODXL2</i>  | -1.471 | 0.051 | -1.546 | 0.042 |
| <i>POLD3</i>   | 3.947  | 0.016 | 4.796  | 0.005 |

|                    |        |       |        |       |
|--------------------|--------|-------|--------|-------|
| <i>POLQ</i>        | 2.419  | 0.005 | 2.225  | 0.009 |
| <i>POLRIE</i>      | -2.122 | 0.057 | -2.303 | 0.040 |
| <i>POLR2C</i>      | -1.834 | 0.079 | -1.786 | 0.086 |
| <i>POSTN</i>       | 3.748  | 0.004 | 4.578  | 0.001 |
| <i>POTEB3</i>      | 3.955  | 0.000 | 3.180  | 0.002 |
| <i>POTED</i>       | 2.544  | 0.032 | 2.585  | 0.030 |
| <i>POU5F2</i>      | -2.507 | 0.009 | -2.040 | 0.027 |
| <i>PPARA</i>       | -1.905 | 0.044 | -1.691 | 0.070 |
| <i>PPFIA1</i>      | 3.176  | 0.003 | 4.354  | 0.000 |
| <i>PPMIF</i>       | -2.628 | 0.027 | -2.253 | 0.054 |
| <i>PPP1R15A</i>    | -3.729 | 0.002 | -3.195 | 0.005 |
| <i>PPP1R1A</i>     | -1.856 | 0.034 | -1.714 | 0.048 |
| <i>PRB3</i>        | -1.287 | 0.086 | -2.037 | 0.010 |
| <i>PRDX2</i>       | 1.407  | 0.084 | 1.380  | 0.090 |
| <i>PRKCQ</i>       | -2.064 | 0.034 | -2.172 | 0.027 |
| <i>PRKCQ-AS1</i>   | -3.662 | 0.004 | -2.553 | 0.034 |
| <i>PRKX</i>        | -2.989 | 0.023 | -3.535 | 0.009 |
| <i>PRMT5</i>       | 2.707  | 0.016 | 2.572  | 0.021 |
| <i>PRPF3</i>       | 3.337  | 0.027 | 2.605  | 0.075 |
| <i>PRR19</i>       | 2.068  | 0.023 | 2.054  | 0.024 |
| <i>PRR34</i>       | -1.330 | 0.056 | -1.540 | 0.030 |
| <i>PRR34-AS1</i>   | -1.920 | 0.025 | -2.343 | 0.008 |
| <i>PRRT3</i>       | 3.872  | 0.002 | 5.126  | 0.000 |
| <i>PRSS21</i>      | -1.804 | 0.030 | -1.431 | 0.077 |
| <i>PRSS3</i>       | -1.939 | 0.030 | -1.718 | 0.052 |
| <i>PSCA</i>        | 2.071  | 0.045 | 3.296  | 0.003 |
| <i>PSEN2</i>       | 3.610  | 0.019 | 3.173  | 0.035 |
| <i>PSMC1</i>       | 1.735  | 0.066 | 1.677  | 0.075 |
| <i>PSMC4</i>       | 1.188  | 0.089 | 1.558  | 0.030 |
| <i>PSMD2</i>       | 1.657  | 0.040 | 1.432  | 0.071 |
| <i>PSMD4</i>       | 1.176  | 0.046 | 1.450  | 0.017 |
| <i>PTGS2</i>       | -1.910 | 0.078 | -1.975 | 0.069 |
| <i>PTN</i>         | -4.036 | 0.026 | -5.222 | 0.006 |
| <i>PTPN13</i>      | 2.124  | 0.078 | 2.263  | 0.062 |
| <i>PTPRO</i>       | -1.677 | 0.099 | -1.830 | 0.074 |
| <i>PTRF</i>        | -1.610 | 0.079 | -2.586 | 0.008 |
| <i>QRFPR</i>       | -2.699 | 0.059 | -2.940 | 0.042 |
| <i>RAB14</i>       | -2.637 | 0.027 | -3.677 | 0.004 |
| <i>RAB30</i>       | 2.201  | 0.098 | 2.224  | 0.095 |
| <i>RABAC1</i>      | 1.274  | 0.045 | 1.564  | 0.017 |
| <i>RAD17</i>       | -2.498 | 0.013 | -2.049 | 0.036 |
| <i>RAD21</i>       | 1.777  | 0.018 | 1.323  | 0.068 |
| <i>RANBP3L</i>     | -2.230 | 0.027 | -2.685 | 0.010 |
| <i>RAPH1</i>       | 1.755  | 0.041 | 1.536  | 0.070 |
| <i>RARRES1</i>     | -3.680 | 0.012 | -3.840 | 0.009 |
| <i>RASA3</i>       | -2.395 | 0.004 | -1.997 | 0.012 |
| <i>RASAL1</i>      | -1.840 | 0.074 | -2.203 | 0.036 |
| <i>RASAL2</i>      | -2.322 | 0.045 | -4.031 | 0.002 |
| <i>RASGEF1B</i>    | -2.179 | 0.093 | -2.336 | 0.074 |
| <i>RASGRF2-AS1</i> | -1.246 | 0.095 | -1.237 | 0.097 |
| <i>RBAK</i>        | 4.520  | 0.009 | 2.866  | 0.078 |
| <i>RBBP8</i>       | 1.913  | 0.044 | 1.925  | 0.043 |
| <i>RBM24</i>       | 3.160  | 0.035 | 2.468  | 0.091 |
| <i>RBM25</i>       | 2.842  | 0.022 | 2.126  | 0.077 |
| <i>RBM34</i>       | 2.970  | 0.020 | 2.401  | 0.054 |

|                 |        |       |        |       |
|-----------------|--------|-------|--------|-------|
| <i>RBM6</i>     | 2.449  | 0.005 | 3.974  | 0.000 |
| <i>RBM8A</i>    | 1.871  | 0.019 | 2.254  | 0.006 |
| <i>RBMS3</i>    | -3.033 | 0.019 | -2.570 | 0.042 |
| <i>RBSG2</i>    | -1.719 | 0.014 | -1.784 | 0.011 |
| <i>RCBTB1</i>   | 4.310  | 0.009 | 3.084  | 0.050 |
| <i>RECQL</i>    | 2.091  | 0.049 | 3.304  | 0.004 |
| <i>REEP2</i>    | 1.909  | 0.053 | 2.025  | 0.042 |
| <i>REEP4</i>    | 3.582  | 0.012 | 4.068  | 0.005 |
| <i>RERGL</i>    | -3.622 | 0.006 | -3.071 | 0.016 |
| <i>RFTN1</i>    | 2.980  | 0.012 | 2.530  | 0.030 |
| <i>RGN</i>      | -3.232 | 0.004 | -2.124 | 0.045 |
| <i>RGS2</i>     | -4.400 | 0.016 | -4.384 | 0.016 |
| <i>RIMS3</i>    | -3.602 | 0.004 | -2.649 | 0.025 |
| <i>RIMS4</i>    | 3.174  | 0.056 | 3.662  | 0.030 |
| <i>RIPPLY3</i>  | 2.973  | 0.021 | 2.047  | 0.099 |
| <i>RMII</i>     | 3.636  | 0.001 | 2.418  | 0.022 |
| <i>RNF103</i>   | 1.549  | 0.024 | 1.185  | 0.074 |
| <i>RNF150</i>   | -2.919 | 0.003 | -2.625 | 0.007 |
| <i>RNF170</i>   | 3.046  | 0.008 | 1.771  | 0.095 |
| <i>RNF213</i>   | 4.151  | 0.048 | 4.071  | 0.052 |
| <i>RNU11</i>    | -1.592 | 0.043 | -2.080 | 0.011 |
| <i>ROPN1</i>    | -4.528 | 0.000 | -5.081 | 0.000 |
| <i>RP2</i>      | 2.653  | 0.002 | 2.470  | 0.003 |
| <i>RPAP3</i>    | 1.790  | 0.011 | 1.288  | 0.054 |
| <i>RPFI</i>     | 2.410  | 0.013 | 1.990  | 0.034 |
| <i>RPH3AL</i>   | 3.244  | 0.013 | 3.763  | 0.005 |
| <i>RPL10A</i>   | -1.272 | 0.022 | -0.945 | 0.077 |
| <i>RPL13</i>    | -1.348 | 0.012 | -1.200 | 0.022 |
| <i>RPL13A</i>   | -1.153 | 0.059 | -1.082 | 0.074 |
| <i>RPL18A</i>   | -1.408 | 0.035 | -1.276 | 0.054 |
| <i>RPL21P44</i> | -1.936 | 0.002 | -1.651 | 0.006 |
| <i>RPL26L1</i>  | 3.892  | 0.016 | 2.836  | 0.069 |
| <i>RPL7A</i>    | -1.081 | 0.051 | -1.150 | 0.039 |
| <i>RPS18</i>    | -1.289 | 0.045 | -1.281 | 0.046 |
| <i>RPS19</i>    | -1.482 | 0.044 | -1.248 | 0.085 |
| <i>RPS27A</i>   | -1.563 | 0.014 | -1.646 | 0.011 |
| <i>RPS6KC1</i>  | 1.346  | 0.082 | 1.275  | 0.098 |
| <i>RPUSD2</i>   | -2.778 | 0.088 | -3.936 | 0.020 |
| <i>RRAS</i>     | 1.846  | 0.044 | 2.613  | 0.007 |
| <i>RRM2</i>     | 4.440  | 0.005 | 4.135  | 0.008 |
| <i>RUNX3</i>    | -3.020 | 0.059 | -3.427 | 0.035 |
| <i>RUSC1</i>    | 1.803  | 0.092 | 1.929  | 0.073 |
| <i>S100A10</i>  | 1.543  | 0.018 | 1.700  | 0.010 |
| <i>S100A14</i>  | 2.842  | 0.004 | 2.788  | 0.005 |
| <i>S100A4</i>   | 2.703  | 0.063 | 2.782  | 0.057 |
| <i>S100A7</i>   | 9.062  | 0.000 | 8.425  | 0.000 |
| <i>S100A9</i>   | 3.967  | 0.002 | 2.526  | 0.030 |
| <i>S100B</i>    | -2.066 | 0.007 | -2.514 | 0.002 |
| <i>S100P</i>    | 5.401  | 0.005 | 4.982  | 0.008 |
| <i>SIPR3</i>    | 2.554  | 0.027 | 2.105  | 0.062 |
| <i>SAA4</i>     | -2.274 | 0.044 | -3.304 | 0.006 |
| <i>SAMD5</i>    | -4.546 | 0.000 | -5.010 | 0.000 |
| <i>SAMD9L</i>   | 3.144  | 0.016 | 2.151  | 0.086 |
| <i>SAP30BP</i>  | 2.467  | 0.068 | 2.663  | 0.050 |
| <i>SAR1A</i>    | 2.258  | 0.026 | 1.649  | 0.092 |

|                   |        |       |        |       |
|-------------------|--------|-------|--------|-------|
| <i>SARM1</i>      | -3.514 | 0.007 | -3.373 | 0.009 |
| <i>SARS</i>       | -1.339 | 0.052 | -1.258 | 0.067 |
| <i>SASH1</i>      | -2.949 | 0.017 | -2.905 | 0.018 |
| <i>SCAMP1</i>     | 2.096  | 0.020 | 2.172  | 0.016 |
| <i>SCAMP3</i>     | 1.588  | 0.022 | 1.517  | 0.027 |
| <i>SCD</i>        | 4.781  | 0.000 | 3.746  | 0.001 |
| <i>SCG2</i>       | 1.158  | 0.094 | 1.656  | 0.021 |
| <i>SCGB3A2</i>    | -1.924 | 0.060 | -2.132 | 0.040 |
| <i>SCN2B</i>      | -2.844 | 0.008 | -2.784 | 0.010 |
| <i>SCN3B</i>      | -3.020 | 0.001 | -2.878 | 0.002 |
| <i>SCN4B</i>      | -3.419 | 0.015 | -3.742 | 0.009 |
| <i>SCNN1B</i>     | -1.680 | 0.081 | -1.920 | 0.049 |
| <i>SDF2</i>       | 2.587  | 0.078 | 2.656  | 0.071 |
| <i>SEC22B</i>     | 1.317  | 0.026 | 0.989  | 0.084 |
| <i>SEC23A</i>     | 2.877  | 0.036 | 2.434  | 0.070 |
| <i>SEC62</i>      | 1.672  | 0.076 | 1.698  | 0.072 |
| <i>SEMA3B</i>     | 4.449  | 0.000 | 4.437  | 0.000 |
| <i>SEMA3B-AS1</i> | 3.257  | 0.024 | 2.769  | 0.051 |
| <i>SEMA5A</i>     | -3.198 | 0.015 | -3.471 | 0.009 |
| <i>SEMA6D</i>     | -1.628 | 0.055 | -1.747 | 0.041 |
| <i>SEPT4</i>      | -1.930 | 0.034 | -1.504 | 0.090 |
| <i>SEPT7</i>      | 2.562  | 0.008 | 2.524  | 0.008 |
| <i>SERPINA1</i>   | 2.204  | 0.044 | 2.023  | 0.062 |
| <i>SERPINB5</i>   | -2.957 | 0.050 | -5.999 | 0.001 |
| <i>SERPINH1</i>   | 1.508  | 0.052 | 1.293  | 0.091 |
| <i>SERTAD2</i>    | 2.089  | 0.055 | 3.422  | 0.004 |
| <i>SF3B2</i>      | 1.966  | 0.023 | 2.080  | 0.017 |
| <i>SFRP1</i>      | -5.240 | 0.000 | -5.572 | 0.000 |
| <i>SFRP4</i>      | 3.417  | 0.000 | 4.870  | 0.000 |
| <i>SFT2D2</i>     | -2.760 | 0.074 | -2.750 | 0.075 |
| <i>SGK1</i>       | -2.479 | 0.018 | -2.051 | 0.044 |
| <i>SGSH</i>       | -3.049 | 0.019 | -2.282 | 0.069 |
| <i>SH3BGRL</i>    | 1.847  | 0.012 | 1.342  | 0.056 |
| <i>SH3BGRL2</i>   | -3.401 | 0.030 | -4.140 | 0.011 |
| <i>SH3BGRL3</i>   | 2.408  | 0.011 | 1.654  | 0.065 |
| <i>SIAH2</i>      | 2.295  | 0.021 | 1.661  | 0.083 |
| <i>SIDT1</i>      | 3.547  | 0.020 | 3.115  | 0.037 |
| <i>SIGIRR</i>     | 2.722  | 0.004 | 2.527  | 0.006 |
| <i>SIGLEC8</i>    | -2.143 | 0.028 | -2.726 | 0.007 |
| <i>SKAP2</i>      | -4.251 | 0.003 | -3.651 | 0.009 |
| <i>SLC16A3</i>    | 2.729  | 0.043 | 3.918  | 0.006 |
| <i>SLC1A1</i>     | 3.595  | 0.028 | 3.484  | 0.032 |
| <i>SLC22A1</i>    | -2.277 | 0.006 | -1.988 | 0.015 |
| <i>SLC24A1</i>    | -2.194 | 0.053 | -2.075 | 0.065 |
| <i>SLC25A39</i>   | 1.886  | 0.044 | 1.689  | 0.069 |
| <i>SLC25A44</i>   | 2.320  | 0.017 | 2.485  | 0.011 |
| <i>SLC27A2</i>    | 3.922  | 0.032 | 3.669  | 0.043 |
| <i>SLC2A10</i>    | 3.372  | 0.021 | 3.353  | 0.022 |
| <i>SLC2A4RG</i>   | 1.511  | 0.066 | 1.367  | 0.093 |
| <i>SLC35F2</i>    | 2.604  | 0.030 | 3.075  | 0.012 |
| <i>SLC35F5</i>    | 2.695  | 0.074 | 3.236  | 0.036 |
| <i>SLC39A6</i>    | 3.660  | 0.001 | 2.659  | 0.007 |
| <i>SLC4A11</i>    | -3.117 | 0.013 | -3.617 | 0.005 |
| <i>SLC5A9</i>     | -1.440 | 0.090 | -1.952 | 0.026 |
| <i>SLC6A14</i>    | -5.878 | 0.004 | -6.232 | 0.003 |

|                  |        |       |        |       |
|------------------|--------|-------|--------|-------|
| <i>SLC7A2</i>    | 3.117  | 0.004 | 3.088  | 0.004 |
| <i>SLFN12</i>    | -1.905 | 0.031 | -1.741 | 0.047 |
| <i>SLITRK6</i>   | 3.031  | 0.041 | 3.200  | 0.032 |
| <i>SMAD3</i>     | -1.849 | 0.063 | -1.934 | 0.053 |
| <i>SMAD5</i>     | 1.715  | 0.068 | 1.635  | 0.081 |
| <i>SMARCC2</i>   | 3.767  | 0.011 | 2.758  | 0.052 |
| <i>SMCO4</i>     | -2.615 | 0.067 | -3.691 | 0.013 |
| <i>SMIM17</i>    | 3.243  | 0.027 | 3.682  | 0.013 |
| <i>SMOX</i>      | -1.712 | 0.031 | -2.385 | 0.004 |
| <i>SMYD1</i>     | -1.877 | 0.032 | -1.782 | 0.041 |
| <i>SMYD4</i>     | -3.940 | 0.031 | -3.906 | 0.032 |
| <i>SNAPC1</i>    | -1.339 | 0.057 | -1.682 | 0.020 |
| <i>SND1</i>      | -1.456 | 0.027 | -1.478 | 0.025 |
| <i>SNHG8</i>     | -1.095 | 0.095 | -1.524 | 0.025 |
| <i>SNORA37</i>   | 2.086  | 0.092 | 2.041  | 0.098 |
| <i>SNORD104</i>  | 4.456  | 0.011 | 3.969  | 0.022 |
| <i>SNORD48</i>   | 2.015  | 0.011 | 2.076  | 0.009 |
| <i>SNORD6</i>    | 2.562  | 0.013 | 2.552  | 0.014 |
| <i>SNORD75</i>   | 2.270  | 0.031 | 3.479  | 0.002 |
| <i>SNORD76</i>   | 3.971  | 0.009 | 2.640  | 0.068 |
| <i>SNRPB2</i>    | 1.236  | 0.058 | 1.368  | 0.038 |
| <i>SNRPE</i>     | 1.253  | 0.025 | 0.973  | 0.073 |
| <i>SNRPG</i>     | 1.114  | 0.052 | 0.939  | 0.096 |
| <i>SOCS2</i>     | -4.446 | 0.003 | -5.053 | 0.001 |
| <i>SOSTDC1</i>   | -4.276 | 0.000 | -3.133 | 0.005 |
| <i>SOX10</i>     | -5.259 | 0.000 | -4.090 | 0.007 |
| <i>SOX8</i>      | -1.853 | 0.025 | -2.445 | 0.005 |
| <i>SOX9-AS1</i>  | -2.505 | 0.035 | -2.775 | 0.021 |
| <i>SP110</i>     | 3.109  | 0.011 | 1.923  | 0.097 |
| <i>SPAG4</i>     | 2.182  | 0.021 | 2.413  | 0.012 |
| <i>SPATA18</i>   | -2.714 | 0.010 | -3.020 | 0.005 |
| <i>SPATA6L</i>   | 1.858  | 0.014 | 1.405  | 0.053 |
| <i>SPCS2</i>     | 1.571  | 0.011 | 1.468  | 0.017 |
| <i>SPECCI1</i>   | 2.694  | 0.007 | 1.547  | 0.095 |
| <i>SPESPI</i>    | -1.784 | 0.036 | -1.441 | 0.084 |
| <i>SPPL3</i>     | 3.077  | 0.020 | 2.950  | 0.025 |
| <i>SPRN</i>      | -2.529 | 0.037 | -2.591 | 0.033 |
| <i>SPRY2</i>     | -3.882 | 0.001 | -4.008 | 0.001 |
| <i>SPTLC3</i>    | -3.272 | 0.041 | -3.654 | 0.024 |
| <i>SPTSSA</i>    | 1.525  | 0.034 | 1.386  | 0.051 |
| <i>SRCAP</i>     | 1.462  | 0.070 | 2.193  | 0.010 |
| <i>SREBF1</i>    | 2.916  | 0.003 | 2.690  | 0.005 |
| <i>SREK1</i>     | 3.159  | 0.016 | 3.243  | 0.014 |
| <i>SRGAP2</i>    | 3.088  | 0.015 | 4.303  | 0.002 |
| <i>SRP9</i>      | 1.050  | 0.037 | 0.969  | 0.052 |
| <i>SRRM2-AS1</i> | 1.770  | 0.060 | 2.831  | 0.005 |
| <i>SRSF11</i>    | 1.220  | 0.057 | 1.159  | 0.069 |
| <i>ST3GAL6</i>   | -3.688 | 0.000 | -4.219 | 0.000 |
| <i>STAC</i>      | -1.483 | 0.045 | -1.339 | 0.067 |
| <i>STAC2</i>     | -3.798 | 0.000 | -3.639 | 0.000 |
| <i>STARD10</i>   | 3.101  | 0.005 | 2.904  | 0.007 |
| <i>STX2</i>      | 2.316  | 0.083 | 3.670  | 0.010 |
| <i>STX7</i>      | -1.847 | 0.058 | -1.745 | 0.072 |
| <i>STYK1</i>     | 2.242  | 0.083 | 3.139  | 0.019 |
| <i>STYXLI</i>    | 2.754  | 0.031 | 2.988  | 0.021 |

|                   |        |       |        |       |
|-------------------|--------|-------|--------|-------|
| <i>SUCO</i>       | 1.700  | 0.014 | 1.191  | 0.071 |
| <i>SUFU</i>       | -3.306 | 0.016 | -2.154 | 0.098 |
| <i>SVIL</i>       | -1.926 | 0.083 | -3.709 | 0.003 |
| <i>SYAPI</i>      | 3.645  | 0.029 | 3.535  | 0.033 |
| <i>SYNM</i>       | -5.387 | 0.007 | -8.543 | 0.000 |
| <i>SYT13</i>      | 6.926  | 0.000 | 5.584  | 0.002 |
| <i>TAF1</i>       | 2.622  | 0.055 | 2.580  | 0.058 |
| <i>TAGLN</i>      | -1.540 | 0.046 | -1.931 | 0.015 |
| <i>TARS2</i>      | 3.210  | 0.035 | 3.080  | 0.042 |
| <i>TAS2R40</i>    | 1.272  | 0.077 | 1.519  | 0.038 |
| <i>TBCE</i>       | 1.834  | 0.041 | 2.014  | 0.027 |
| <i>TBL1Y</i>      | -1.916 | 0.035 | -1.732 | 0.054 |
| <i>TCF4</i>       | 2.514  | 0.022 | 2.315  | 0.033 |
| <i>TEFM</i>       | -1.997 | 0.094 | -3.413 | 0.008 |
| <i>TERF2IP</i>    | -1.620 | 0.037 | -1.634 | 0.036 |
| <i>TESC</i>       | -5.858 | 0.000 | -5.330 | 0.000 |
| <i>TEX10</i>      | -2.273 | 0.039 | -2.312 | 0.036 |
| <i>TF</i>         | -2.813 | 0.005 | -4.064 | 0.000 |
| <i>TFAP4</i>      | -2.896 | 0.020 | -3.408 | 0.008 |
| <i>TFB1M</i>      | -2.403 | 0.005 | -1.694 | 0.038 |
| <i>TFF1</i>       | 3.443  | 0.000 | 2.974  | 0.000 |
| <i>TFF3</i>       | 3.555  | 0.010 | 2.816  | 0.034 |
| <i>TFPI</i>       | -4.674 | 0.002 | -4.098 | 0.005 |
| <i>TFRC</i>       | 2.801  | 0.006 | 1.891  | 0.051 |
| <i>TGFB111</i>    | -2.968 | 0.024 | -2.650 | 0.041 |
| <i>TGFBR2</i>     | -4.572 | 0.004 | -6.776 | 0.000 |
| <i>THBS3</i>      | 1.952  | 0.079 | 3.869  | 0.002 |
| <i>THC2497493</i> | -2.898 | 0.043 | -2.354 | 0.093 |
| <i>THC2507047</i> | 7.695  | 0.000 | 9.125  | 0.000 |
| <i>THC2537043</i> | -2.171 | 0.055 | -2.158 | 0.056 |
| <i>THC2538174</i> | 4.375  | 0.001 | 5.970  | 0.000 |
| <i>THC2581513</i> | 2.679  | 0.064 | 3.025  | 0.039 |
| <i>THC2586088</i> | -3.838 | 0.006 | -3.588 | 0.009 |
| <i>THC2588995</i> | -1.571 | 0.074 | -1.454 | 0.097 |
| <i>THC2670954</i> | -1.884 | 0.005 | -1.266 | 0.046 |
| <i>THC2686816</i> | -1.705 | 0.036 | -1.596 | 0.048 |
| <i>THC2698991</i> | -2.182 | 0.035 | -1.805 | 0.074 |
| <i>THC2769306</i> | -1.296 | 0.051 | -1.377 | 0.039 |
| <i>THC2772172</i> | 2.612  | 0.013 | 1.896  | 0.060 |
| <i>THEMIS</i>     | -1.695 | 0.039 | -1.683 | 0.040 |
| <i>THOC2</i>      | 2.161  | 0.070 | 2.677  | 0.028 |
| <i>THSD4</i>      | -3.848 | 0.010 | -2.455 | 0.081 |
| <i>THY1</i>       | 1.768  | 0.063 | 1.934  | 0.044 |
| <i>TIFA</i>       | -1.538 | 0.093 | -1.626 | 0.077 |
| <i>TIMM17B</i>    | 1.341  | 0.058 | 1.162  | 0.096 |
| <i>TIMM8A</i>     | -2.609 | 0.052 | -3.880 | 0.007 |
| <i>TIPRL</i>      | 1.479  | 0.064 | 1.654  | 0.041 |
| <i>TJP3</i>       | 3.967  | 0.033 | 3.254  | 0.074 |
| <i>TK1</i>        | 3.222  | 0.011 | 4.367  | 0.001 |
| <i>TK2</i>        | -2.400 | 0.069 | -3.455 | 0.013 |
| <i>TLR6</i>       | -2.105 | 0.018 | -1.508 | 0.077 |
| <i>TMEM108</i>    | -1.367 | 0.053 | -1.356 | 0.055 |
| <i>TMEM126A</i>   | 3.323  | 0.008 | 2.281  | 0.054 |
| <i>TMEM126B</i>   | 2.007  | 0.019 | 1.455  | 0.078 |
| <i>TMEM139</i>    | -4.105 | 0.021 | -4.279 | 0.017 |

|                   |        |       |        |       |
|-------------------|--------|-------|--------|-------|
| <i>TMEM14A</i>    | 3.295  | 0.061 | 3.701  | 0.037 |
| <i>TMEM255A</i>   | -1.858 | 0.023 | -2.032 | 0.015 |
| <i>TMEM41A</i>    | 2.166  | 0.073 | 2.701  | 0.029 |
| <i>TMOD4</i>      | 1.623  | 0.097 | 1.937  | 0.052 |
| <i>TMPRSS6</i>    | 1.963  | 0.095 | 2.206  | 0.064 |
| <i>TNFAIP1</i>    | 1.563  | 0.047 | 1.721  | 0.030 |
| <i>TNPO1</i>      | 3.473  | 0.019 | 2.421  | 0.089 |
| <i>TNS4</i>       | -3.075 | 0.030 | -3.883 | 0.008 |
| <i>TOP2A</i>      | 3.758  | 0.021 | 4.072  | 0.013 |
| <i>TOX3</i>       | 2.108  | 0.080 | 2.534  | 0.039 |
| <i>TP53INP1</i>   | 5.120  | 0.002 | 4.508  | 0.006 |
| <i>TPBG</i>       | 1.617  | 0.055 | 1.499  | 0.073 |
| <i>TPK1</i>       | -4.476 | 0.000 | -4.733 | 0.000 |
| <i>TPM3</i>       | 2.402  | 0.004 | 2.288  | 0.006 |
| <i>TPPP2</i>      | -2.198 | 0.005 | -1.471 | 0.046 |
| <i>TPR</i>        | 2.560  | 0.006 | 2.849  | 0.003 |
| <i>TPRXL</i>      | -2.253 | 0.017 | -3.155 | 0.002 |
| <i>TRAF3IP2</i>   | -2.978 | 0.027 | -2.374 | 0.070 |
| <i>TRAPPC9</i>    | 2.049  | 0.071 | 2.597  | 0.026 |
| <i>TRIB3</i>      | 2.816  | 0.021 | 2.205  | 0.062 |
| <i>TRIM11</i>     | 1.557  | 0.099 | 2.073  | 0.033 |
| <i>TRIM29</i>     | -4.741 | 0.009 | -5.106 | 0.006 |
| <i>TRIM52-AS1</i> | -1.654 | 0.055 | -1.747 | 0.044 |
| <i>TRIM67</i>     | -1.893 | 0.023 | -1.449 | 0.072 |
| <i>TRMT1</i>      | -2.916 | 0.095 | -4.269 | 0.019 |
| <i>TSPAN31</i>    | -1.977 | 0.094 | -2.079 | 0.079 |
| <i>TSPAN7</i>     | -2.183 | 0.015 | -1.688 | 0.050 |
| <i>TSTA3</i>      | 1.877  | 0.088 | 2.998  | 0.011 |
| <i>TTC37</i>      | 1.481  | 0.086 | 1.908  | 0.031 |
| <i>TLL1</i>       | -3.704 | 0.001 | -4.655 | 0.000 |
| <i>TLL4</i>       | -2.920 | 0.023 | -3.766 | 0.005 |
| <i>TTPAL</i>      | 4.122  | 0.017 | 4.200  | 0.015 |
| <i>TTYH1</i>      | -3.869 | 0.001 | -3.710 | 0.002 |
| <i>TUBB3</i>      | 3.975  | 0.007 | 5.106  | 0.001 |
| <i>TUBE1</i>      | -3.212 | 0.042 | -4.450 | 0.007 |
| <i>TWSG1</i>      | 1.524  | 0.072 | 1.574  | 0.064 |
| <i>TXNDC8</i>     | 1.415  | 0.016 | 1.283  | 0.026 |
| <i>TXNIP</i>      | -1.607 | 0.020 | -1.252 | 0.063 |
| <i>TXNL4A</i>     | 1.945  | 0.007 | 1.173  | 0.081 |
| <i>TYMS</i>       | 3.205  | 0.024 | 3.707  | 0.011 |
| <i>UBE2C</i>      | 3.561  | 0.015 | 3.143  | 0.029 |
| <i>UBE2Q2P1</i>   | 1.863  | 0.081 | 2.893  | 0.010 |
| <i>UBE2S</i>      | 2.103  | 0.087 | 2.044  | 0.095 |
| <i>UBE2T</i>      | 4.658  | 0.000 | 3.169  | 0.006 |
| <i>UBXN4</i>      | 2.631  | 0.022 | 2.902  | 0.024 |
| <i>UCP3</i>       | 2.004  | 0.032 | 1.878  | 0.042 |
| <i>UGDH</i>       | 2.085  | 0.006 | 2.250  | 0.004 |
| <i>UGT2B15</i>    | -1.703 | 0.099 | -1.774 | 0.087 |
| <i>UHMK1</i>      | 2.880  | 0.006 | 3.274  | 0.002 |
| <i>UHRF1</i>      | 2.739  | 0.076 | 2.719  | 0.078 |
| <i>ULK4P3</i>     | -2.751 | 0.047 | -2.974 | 0.033 |
| <i>UNC13B</i>     | 2.589  | 0.092 | 2.975  | 0.056 |
| <i>UNC5B</i>      | 2.209  | 0.030 | 2.390  | 0.020 |
| <i>USPL1</i>      | -2.127 | 0.095 | -2.701 | 0.039 |
| <i>UTP3</i>       | 2.093  | 0.077 | 2.403  | 0.045 |

|                  |        |       |        |       |
|------------------|--------|-------|--------|-------|
| <i>UTP6</i>      | 2.630  | 0.021 | 2.153  | 0.053 |
| <i>UTRN</i>      | -1.656 | 0.017 | -2.708 | 0.000 |
| <i>VAC14-AS1</i> | 2.465  | 0.017 | 2.201  | 0.031 |
| <i>VATIL</i>     | -1.313 | 0.089 | -1.267 | 0.099 |
| <i>VCAN</i>      | 2.566  | 0.054 | 3.514  | 0.012 |
| <i>VCP</i>       | 1.581  | 0.021 | 1.183  | 0.075 |
| <i>VCPIP1</i>    | 3.145  | 0.022 | 4.462  | 0.002 |
| <i>VDAC3</i>     | 4.073  | 0.006 | 3.133  | 0.026 |
| <i>VEGFA</i>     | 2.816  | 0.059 | 2.754  | 0.064 |
| <i>VEPH1</i>     | -1.826 | 0.029 | -1.374 | 0.089 |
| <i>VGLL1</i>     | -3.038 | 0.007 | -1.746 | 0.098 |
| <i>VPS13D</i>    | -2.018 | 0.017 | -1.608 | 0.051 |
| <i>VPS37A</i>    | 2.443  | 0.009 | 2.784  | 0.004 |
| <i>VPS37B</i>    | -2.630 | 0.085 | -2.930 | 0.057 |
| <i>VPS51</i>     | -1.657 | 0.082 | -2.715 | 0.008 |
| <i>VPS72</i>     | 1.146  | 0.076 | 1.317  | 0.044 |
| <i>VSIG10L</i>   | -1.954 | 0.024 | -2.356 | 0.008 |
| <i>VSNL1</i>     | -2.467 | 0.021 | -2.081 | 0.047 |
| <i>WBPI</i>      | 3.537  | 0.053 | 3.729  | 0.042 |
| <i>WDHD1</i>     | 3.510  | 0.015 | 2.565  | 0.065 |
| <i>WDR35</i>     | -2.463 | 0.092 | -2.845 | 0.055 |
| <i>WDR86</i>     | -2.068 | 0.069 | -2.230 | 0.051 |
| <i>WDR91</i>     | 3.224  | 0.067 | 2.998  | 0.086 |
| <i>WIF1</i>      | -4.287 | 0.003 | -3.945 | 0.005 |
| <i>WIP11</i>     | 2.957  | 0.024 | 3.228  | 0.015 |
| <i>WNT6</i>      | -2.355 | 0.044 | -2.215 | 0.057 |
| <i>WNT9B</i>     | -1.537 | 0.050 | -1.545 | 0.049 |
| <i>WSB2</i>      | 1.041  | 0.072 | 1.224  | 0.037 |
| <i>WWP1</i>      | 2.420  | 0.013 | 2.172  | 0.023 |
| <i>XAB2</i>      | 3.464  | 0.071 | 3.639  | 0.059 |
| <i>XIRP2</i>     | -1.450 | 0.033 | -1.342 | 0.046 |
| <i>XK</i>        | -1.487 | 0.082 | -1.577 | 0.067 |
| <i>YBX3</i>      | -2.204 | 0.001 | -1.316 | 0.027 |
| <i>YWHAZ</i>     | 0.876  | 0.091 | 0.917  | 0.078 |
| <i>ZBTB49</i>    | -2.534 | 0.002 | -2.482 | 0.003 |
| <i>ZBTB7C</i>    | 2.772  | 0.017 | 3.213  | 0.007 |
| <i>ZC3H14</i>    | 1.648  | 0.034 | 1.880  | 0.018 |
| <i>ZC4H2</i>     | -2.284 | 0.075 | -2.917 | 0.027 |
| <i>ZDHHC16</i>   | 2.337  | 0.079 | 2.517  | 0.060 |
| <i>ZFP36L2</i>   | -2.210 | 0.066 | -2.515 | 0.039 |
| <i>ZG16B</i>     | 2.414  | 0.006 | 3.100  | 0.001 |
| <i>ZKSCAN2</i>   | 2.270  | 0.045 | 3.318  | 0.006 |
| <i>ZNF285</i>    | -2.784 | 0.022 | -3.377 | 0.007 |
| <i>ZNF322</i>    | 2.353  | 0.008 | 2.217  | 0.011 |
| <i>ZNF350</i>    | 2.315  | 0.069 | 2.277  | 0.073 |
| <i>ZNF358</i>    | -1.183 | 0.098 | -2.066 | 0.007 |
| <i>ZNF442</i>    | -1.604 | 0.063 | -1.586 | 0.096 |
| <i>ZNF470</i>    | 2.077  | 0.068 | 2.480  | 0.032 |
| <i>ZNF471</i>    | -1.806 | 0.071 | -1.687 | 0.089 |
| <i>ZNF501</i>    | -3.222 | 0.002 | -2.238 | 0.022 |
| <i>ZNF502</i>    | -4.927 | 0.001 | -4.157 | 0.004 |
| <i>ZNF506</i>    | -2.719 | 0.014 | -1.824 | 0.084 |
| <i>ZNF521</i>    | -5.390 | 0.002 | -2.820 | 0.073 |
| <i>ZNF548</i>    | 2.158  | 0.052 | 2.067  | 0.061 |
| <i>ZNF567</i>    | 2.557  | 0.020 | 2.136  | 0.047 |



|                |        |       |        |       |
|----------------|--------|-------|--------|-------|
| <i>ZNF586</i>  | -2.931 | 0.051 | -2.469 | 0.095 |
| <i>ZNF627</i>  | 2.602  | 0.019 | 1.894  | 0.075 |
| <i>ZNF649</i>  | -1.912 | 0.026 | -2.173 | 0.013 |
| <i>ZNF699</i>  | -1.603 | 0.079 | -2.091 | 0.026 |
| <i>ZNF705G</i> | -1.489 | 0.051 | -1.859 | 0.018 |
| <i>ZNF721</i>  | 3.608  | 0.000 | 3.452  | 0.000 |
| <i>ZNF827</i>  | -1.386 | 0.094 | -2.069 | 0.017 |
| <i>ZNF846</i>  | -1.320 | 0.075 | -1.397 | 0.061 |
| <i>ZNFX1</i>   | 4.348  | 0.007 | 3.272  | 0.035 |
| <i>ZNRF1</i>   | -2.437 | 0.027 | -2.529 | 0.023 |
| <i>ZPI</i>     | 1.296  | 0.048 | 1.098  | 0.089 |
| <i>ZSCAN9</i>  | -2.540 | 0.005 | -3.341 | 0.001 |
| <i>ZWINT</i>   | 5.104  | 0.000 | 4.458  | 0.001 |

---

**Table S2.** Gene-set enrichment analysis of cell migration in solid and trabecular structures

| Gene Set Name    | Overlap  | P-value   | FDR q-value | Genes                                                                                                                                                                                                                                                                                                                                                                                                                                                                                                                                                                                                                                                                                                                                                                                                                                                                                                                                                                                                                    |
|------------------|----------|-----------|-------------|--------------------------------------------------------------------------------------------------------------------------------------------------------------------------------------------------------------------------------------------------------------------------------------------------------------------------------------------------------------------------------------------------------------------------------------------------------------------------------------------------------------------------------------------------------------------------------------------------------------------------------------------------------------------------------------------------------------------------------------------------------------------------------------------------------------------------------------------------------------------------------------------------------------------------------------------------------------------------------------------------------------------------|
| GO_LOCOMOTION    | 141/1984 | 2.15E-22  | 1.62E-19    | <i>AKT1; CAV1; AGT; LYN; PTGS2; DAB2; SPRY2; DRD2; ITGB1BP1; SMAD3; SFRP1; FADD; GJA1; TGFB111; MESP1; IGFBP5; KANK1; LGALS9; PDGFRA; FGF2; SEMA5A; COL3A1; APC; TGFB2; THY1; PRKCQ; ITGAV; GLG1; HMGB2; CTHRC1; SOX10; PTPRO; ANXA1; RPS19; SEMA3B; SEMA6D; VEGFA; CCN1; EDN3; EMP2; KIT; NTRK3; GCNT2; GLIPR2; PTN; P2RY12; S100A9; F11R; ACTN4; CHN1; ASPM; COL1A1; KIF14; FN1; NCKAP1L; EPHB1; PRKX; LEF1; HDAC5; SRGAP2; TP53INP1; HOXA7; SOX8; HOXA2; TRIM11; POSTN; MAG; COL5A1; BMERB1; RACK1; CAV2; CCL5; GRB2; FERMT1; GRB14; UNC5B; PDGFA; BST2; PAK5; EZR; HSPB1; DNAJA1; DUSP1; GSTP1; ARRDC3; SCG2; TNFAIP1; KANK2; APOD; PADI2; CYP7B1; APCDD1; FAP; PLA2G6; CCL21; PIK3CG; TF; SASH1; S100A7; GLUL; BVES; LGR6; DCDC2; PPM1F; RGN; VEGFD; ROPN1; RRAS; GAPDHS; SGK1; MYLK; PKN3; MMP1; VPS37B; ADAM15; PRSS3; DOCK4; SEPTIN7; PARD6B; TUBB3; NFIB; FOLR1; JCHAIN; COL1A2; DNAH5; DNAH1; EGR2; CCL28; LAMA3; PODXL2; MATN2; AMOTL1; S100A14; FUT8; IGLL1; SAA4; CAVINI; S100P; SLC16A3; ALCAM; ZNF502</i> |
| GO_LAMELLIPODIUM | 18/194   | 0.0000184 | 0.000263    | <i>ITGAV; APC; FAP; AMOTL1; SRGAP2; CTNND1; SLC39A6; HCLS1; STX2; PTPRO; MYLK; TESC; HAX; TUBB3; ITGB1BP1; PTPN13; RAPH1; ABLIM1</i>                                                                                                                                                                                                                                                                                                                                                                                                                                                                                                                                                                                                                                                                                                                                                                                                                                                                                     |

**Table S3.** Genes expressed in solid and trabecular structures but not in tubular and alveolar structures of breast cancer (p-value < 0.05)

| Gene                   | Solid structures |         | Trabecular structures |         | Association with cell migration             |                                                                                                           |
|------------------------|------------------|---------|-----------------------|---------|---------------------------------------------|-----------------------------------------------------------------------------------------------------------|
|                        | LogFC            | P-value | LogFC                 | P-value | Reference                                   | Link                                                                                                      |
| <i>AACS</i>            | 2.791            | 0.038   | 3.038                 | 0.026   | No data                                     |                                                                                                           |
| <i>ABLIM1</i>          | -1.969           | 0.035   | -2.498                | 0.010   | Narahara et al, J Cell Physiol. 2018        | <a href="https://doi.org/10.1002/jcp.26605">https://doi.org/10.1002/jcp.26605</a>                         |
| <i>ADAMTS16</i>        | 1.968            | 0.030   | 1.849                 | 0.040   | Surridge et al., Matrix Biol. 2009          | <a href="https://doi.org/10.1016/j.matbio.2009.07.001">https://doi.org/10.1016/j.matbio.2009.07.001</a>   |
| <i>AK130224</i>        | -1.889           | 0.039   | -1.908                | 0.037   | No data                                     |                                                                                                           |
| <i>ALDH7A1</i>         | -2.031           | 0.035   | -2.932                | 0.004   | Elsalem et al., EJC 2016                    | <a href="https://doi.org/10.1016/S0959-8049(16)61361-8">https://doi.org/10.1016/S0959-8049(16)61361-8</a> |
| <i>ALG5</i>            | 2.529            | 0.008   | 2.014                 | 0.029   | No data                                     |                                                                                                           |
| <i>ALYREF</i>          | 2.728            | 0.045   | 3.047                 | 0.027   | Saito et al., J Cancer Res Clin Oncol. 2013 | <a href="https://doi.org/10.1007/s00432-012-1361-5">https://doi.org/10.1007/s00432-012-1361-5</a>         |
| <i>AMOTL1</i>          | -2.854           | 0.031   | -3.137                | 0.019   | Couderc et al., Neoplasia 2016              | <a href="https://doi.org/10.1016/j.neo.2015.11.010">https://doi.org/10.1016/j.neo.2015.11.010</a>         |
| <i>APOA1BP</i>         | 3.700            | 0.029   | 3.293                 | 0.049   | No data                                     |                                                                                                           |
| <i>ASCC3</i>           | 3.359            | 0.037   | 3.403                 | 0.035   | No data                                     |                                                                                                           |
| <i>BRMS1L</i>          | -2.203           | 0.035   | -2.056                | 0.048   | Gong et al., Nat Commun. 2014               | <a href="https://doi.org/10.1038/ncomms6406">https://doi.org/10.1038/ncomms6406</a>                       |
| <i>BU963192</i>        | 3.430            | 0.027   | 3.839                 | 0.015   | No data                                     |                                                                                                           |
| <i>BVES</i>            | -2.099           | 0.018   | -2.015                | 0.023   | Benesh et al., Mol Biol Cell. 2013          | <a href="https://doi.org/10.1091/mbc.E12-07-0539">https://doi.org/10.1091/mbc.E12-07-0539</a>             |
| <i>CAVI</i>            | -3.196           | 0.046   | -3.204                | 0.045   | Grande-García et al., J Cell Biol. 2007     | <a href="https://doi.org/10.1083/jcb.200701006">https://doi.org/10.1083/jcb.200701006</a>                 |
| <i>CEP78</i>           | 1.569            | 0.038   | 1.564                 | 0.038   | No data                                     |                                                                                                           |
| <i>CHST2</i>           | -2.771           | 0.011   | -2.788                | 0.011   | No data                                     |                                                                                                           |
| <i>CLUAP1</i>          | 2.909            | 0.022   | 3.510                 | 0.008   | Beyer et al., Mol Cell Proteomics. 2018     | <a href="https://doi.org/10.1074/mcp.RA117.000487">https://doi.org/10.1074/mcp.RA117.000487</a>           |
| <i>CNIH4</i>           | 1.758            | 0.015   | 1.384                 | 0.048   | Mishra et al., Oncogene 2019                | <a href="https://doi.org/10.1038/s41388-019-0845-z">https://doi.org/10.1038/s41388-019-0845-z</a>         |
| <i>CTIF</i>            | 2.482            | 0.043   | 2.559                 | 0.038   | No data                                     |                                                                                                           |
| <i>CTNND1</i>          | -2.277           | 0.020   | -2.538                | 0.011   | Tang et al., J Exp Clin Cancer Res. 2016    | <a href="https://doi.org/10.1186/s13046-016-0344-9">https://doi.org/10.1186/s13046-016-0344-9</a>         |
| <i>DDI2</i>            | -3.700           | 0.026   | -3.541                | 0.032   | No data                                     |                                                                                                           |
| <i>DNAH1</i>           | -1.401           | 0.048   | -1.846                | 0.012   | Milosevic et al., BMC Cancer. 2013          | <a href="https://doi.org/10.1186/1471-2407-13-473">https://doi.org/10.1186/1471-2407-13-473</a>           |
| <i>DNAJC22</i>         | 2.954            | 0.008   | 2.224                 | 0.037   | No data                                     |                                                                                                           |
| <i>ENST00000299512</i> | -1.620           | 0.025   | -1.898                | 0.011   | No data                                     |                                                                                                           |
| <i>ENST00000334163</i> | 2.033            | 0.025   | 2.236                 | 0.015   | No data                                     |                                                                                                           |
| <i>ENST00000417510</i> | -1.992           | 0.018   | -2.909                | 0.001   | No data                                     |                                                                                                           |
| <i>ENST00000429552</i> | -1.202           | 0.047   | -1.193                | 0.048   | No data                                     |                                                                                                           |
| <i>ENST00000433051</i> | -1.875           | 0.031   | -1.897                | 0.030   | No data                                     |                                                                                                           |
| <i>ENST00000455206</i> | -1.216           | 0.036   | -1.276                | 0.029   | No data                                     |                                                                                                           |
| <i>ENST00000457863</i> | 2.409            | 0.014   | 2.264                 | 0.019   | No data                                     |                                                                                                           |
| <i>ENST00000502684</i> | -1.756           | 0.022   | -1.698                | 0.026   | No data                                     |                                                                                                           |

|                        |        |       |        |       |                                           |                                                                                                                   |
|------------------------|--------|-------|--------|-------|-------------------------------------------|-------------------------------------------------------------------------------------------------------------------|
| <i>ENST00000506710</i> | -2.078 | 0.008 | -1.494 | 0.043 | No data                                   |                                                                                                                   |
| <i>ENST00000527434</i> | 2.689  | 0.003 | 2.114  | 0.015 | No data                                   |                                                                                                                   |
| <i>ENST00000596267</i> | 2.483  | 0.021 | 2.502  | 0.020 | No data                                   |                                                                                                                   |
| <i>ETFDH</i>           | 2.367  | 0.048 | 3.473  | 0.006 | No data                                   |                                                                                                                   |
| <i>EXOC1</i>           | 1.947  | 0.035 | 3.249  | 0.001 | Andersen & Yeaman, Mol Biol Cell. 2010    | <a href="https://doi.org/10.1091/mbc.E09-06-0459">https://doi.org/10.1091/mbc.E09-06-0459</a>                     |
| <i>EZR</i>             | 1.993  | 0.036 | 1.918  | 0.043 | Arpin et al., Cell Adh Migr. 2011         | <a href="https://doi.org/10.4161/cam.5.2.15081">https://doi.org/10.4161/cam.5.2.15081</a>                         |
| <i>F13A1</i>           | 3.636  | 0.019 | 4.639  | 0.004 | Dardik et al., Cell Physiol Biochem. 2007 | <a href="https://doi.org/10.1159/000099199">https://doi.org/10.1159/000099199</a>                                 |
| <i>FAM109A</i>         | -3.613 | 0.015 | -3.259 | 0.026 | No data                                   |                                                                                                                   |
| <i>FBXO28</i>          | 2.370  | 0.015 | 1.881  | 0.047 | No data                                   |                                                                                                                   |
| <i>FCERIA</i>          | -3.174 | 0.026 | -3.224 | 0.024 | No data                                   |                                                                                                                   |
| <i>FDCSP</i>           | -3.715 | 0.030 | -3.687 | 0.031 | Wang et al., Oncol Rep. 2010              | <a href="https://www.ncbi.nlm.nih.gov/pubmed/20811673">https://www.ncbi.nlm.nih.gov/pubmed/20811673</a>           |
| <i>GLG1</i>            | -1.616 | 0.040 | -1.737 | 0.029 | Planche et al., Cancer Res. 2012          | <a href="https://doi.org/10.1158/1538-7445.AM2012-3245">https://doi.org/10.1158/1538-7445.AM2012-3245</a>         |
| <i>GPR75</i>           | -2.847 | 0.048 | -4.330 | 0.005 | Fan & Roman, Circ Res. 2017               | <a href="https://doi.org/10.1161/CIRCRESAHA.117.311022">https://doi.org/10.1161/CIRCRESAHA.117.311022</a>         |
| <i>HDAC3</i>           | 2.046  | 0.016 | 1.978  | 0.020 | He et al., Int J Oncol. 2018              | <a href="https://doi.org/10.3892/ijo.2018.4284">https://doi.org/10.3892/ijo.2018.4284</a>                         |
| <i>HMGB3P1</i>         | 2.657  | 0.009 | 2.486  | 0.013 | No data                                   |                                                                                                                   |
| <i>IL13RA1</i>         | 1.883  | 0.037 | 2.077  | 0.023 | Moretti et al., Medical Express 2015      | <a href="https://doi.org/10.5935/MedicalExpress.2015.05.05">https://doi.org/10.5935/MedicalExpress.2015.05.05</a> |
| <i>IQSEC3</i>          | -1.683 | 0.047 | -2.189 | 0.013 | No data                                   |                                                                                                                   |
| <i>KBTBD6</i>          | -2.913 | 0.014 | -2.251 | 0.049 | No data                                   |                                                                                                                   |
| <i>KCNIP3</i>          | -1.493 | 0.012 | -1.398 | 0.018 | No data                                   |                                                                                                                   |
| <i>KLHL14</i>          | 1.386  | 0.034 | 1.870  | 0.006 | Di Lollo et al., Sci Rep. 2020            | <a href="https://doi.org/10.1038/s41598-020-61017-y">https://doi.org/10.1038/s41598-020-61017-y</a>               |
| <i>KPNB1</i>           | 1.769  | 0.032 | 1.760  | 0.033 | Stelma & Leaner, Oncotarget. 2017         | <a href="https://doi.org/10.18632/oncotarget.15834">https://doi.org/10.18632/oncotarget.15834</a>                 |
| <i>L3HYPDH</i>         | 2.652  | 0.040 | 2.902  | 0.027 | No data                                   |                                                                                                                   |
| <i>LINC00240</i>       | -2.121 | 0.029 | -2.374 | 0.016 | No data                                   |                                                                                                                   |
| <i>LINC00865</i>       | -2.723 | 0.018 | -2.708 | 0.019 | No data                                   |                                                                                                                   |
| <i>LIPG</i>            | -1.589 | 0.022 | -1.625 | 0.020 | Lo et al., eLife. 2018                    | <a href="https://doi.org/10.7554/eLife.31334">https://doi.org/10.7554/eLife.31334</a>                             |
| <i>LOC100506314</i>    | -1.646 | 0.046 | -2.120 | 0.013 | No data                                   |                                                                                                                   |
| <i>LOC100506411</i>    | 2.372  | 0.016 | 1.905  | 0.047 | No data                                   |                                                                                                                   |
| <i>LOC100506827</i>    | -1.602 | 0.026 | -1.662 | 0.022 | No data                                   |                                                                                                                   |
| <i>LOC101927322</i>    | -1.802 | 0.046 | -2.040 | 0.026 | No data                                   |                                                                                                                   |
| <i>LOC102723882</i>    | -1.863 | 0.035 | -1.716 | 0.050 | No data                                   |                                                                                                                   |
| <i>LOC643454</i>       | 1.896  | 0.024 | 1.664  | 0.044 | No data                                   |                                                                                                                   |
| <i>LOC643733</i>       | -2.994 | 0.008 | -2.813 | 0.011 | No data                                   |                                                                                                                   |
| <i>LRRN4CL</i>         | 3.000  | 0.041 | 3.525  | 0.019 | No data                                   |                                                                                                                   |
| <i>LUC7L2</i>          | -2.566 | 0.011 | -2.435 | 0.015 | No data                                   |                                                                                                                   |
| <i>MASTL</i>           | 3.283  | 0.049 | 3.579  | 0.034 | Rogers et al., Oncogene. 2018             | <a href="https://doi.org/10.1038/s41388-018-0295-z">https://doi.org/10.1038/s41388-018-0295-z</a>                 |
| <i>METTL10</i>         | 1.855  | 0.042 | 1.864  | 0.042 | No data                                   |                                                                                                                   |

|                 |        |       |        |       |                                      |                                                                                                       |
|-----------------|--------|-------|--------|-------|--------------------------------------|-------------------------------------------------------------------------------------------------------|
| <i>MFI2</i>     | -2.873 | 0.023 | -3.043 | 0.017 | Yin et al., Oncol Rep. 2016          | <a href="https://doi.org/10.3892/or.2016.5013">https://doi.org/10.3892/or.2016.5013</a>               |
| <i>MIR3916</i>  | 2.218  | 0.033 | 2.143  | 0.039 | No data                              |                                                                                                       |
| <i>MIR503HG</i> | 1.585  | 0.040 | 1.762  | 0.024 | No data                              |                                                                                                       |
| <i>MRPL55</i>   | 1.307  | 0.036 | 1.632  | 0.011 | No data                              |                                                                                                       |
| <i>MTF2</i>     | 2.787  | 0.033 | 2.715  | 0.037 | No data                              |                                                                                                       |
| <i>MUTYH</i>    | 2.956  | 0.032 | 3.573  | 0.012 | Gao et al., Onco Targets Ther. 2018  | <a href="https://doi.org/10.2147/OTT.S174223">https://doi.org/10.2147/OTT.S174223</a>                 |
| <i>MVB12B</i>   | -2.918 | 0.050 | -3.041 | 0.042 | No data                              |                                                                                                       |
| <i>NAA10</i>    | 2.254  | 0.049 | 2.996  | 0.012 | No data                              |                                                                                                       |
| <i>NCKAP1L</i>  | -1.724 | 0.027 | -1.737 | 0.026 | Afzal et al., J Am Heart Assoc. 2016 | <a href="https://doi.org/10.1161/JAHA.116.004629">https://doi.org/10.1161/JAHA.116.004629</a>         |
| <i>NEIL1</i>    | -2.997 | 0.043 | -3.746 | 0.014 | No data                              |                                                                                                       |
| <i>PLCH1</i>    | -1.734 | 0.046 | -1.762 | 0.043 | No data                              |                                                                                                       |
| <i>PRR19</i>    | 2.068  | 0.023 | 2.054  | 0.024 | No data                              |                                                                                                       |
| <i>PSCA</i>     | 2.071  | 0.045 | 3.296  | 0.003 | Wang et al., J Pathol. 2015          | <a href="https://doi.org/10.1002/path.4582">https://doi.org/10.1002/path.4582</a>                     |
| <i>RAD17</i>    | -2.498 | 0.013 | -2.049 | 0.036 | No data                              |                                                                                                       |
| <i>RBBP8</i>    | 1.913  | 0.044 | 1.925  | 0.043 | No data                              |                                                                                                       |
| <i>RCBTB1</i>   | 4.310  | 0.009 | 3.084  | 0.050 | No data                              |                                                                                                       |
| <i>RECQL</i>    | 2.091  | 0.049 | 3.304  | 0.004 | No data                              |                                                                                                       |
| <i>RFTN1</i>    | 2.980  | 0.012 | 2.530  | 0.030 | No data                              |                                                                                                       |
| <i>RPS18</i>    | -1.289 | 0.045 | -1.281 | 0.046 | No data                              |                                                                                                       |
| <i>SCAMP3</i>   | 1.588  | 0.022 | 1.517  | 0.027 | No data                              |                                                                                                       |
| <i>SLC16A3</i>  | 2.729  | 0.043 | 3.918  | 0.006 | No data                              |                                                                                                       |
| <i>SLC4A11</i>  | -3.117 | 0.013 | -3.617 | 0.005 | No data                              |                                                                                                       |
| <i>SLFN12</i>   | -1.905 | 0.031 | -1.741 | 0.047 | No data                              |                                                                                                       |
| <i>SMIM17</i>   | 3.243  | 0.027 | 3.682  | 0.013 | No data                              |                                                                                                       |
| <i>SNORD104</i> | 4.456  | 0.011 | 3.969  | 0.022 | No data                              |                                                                                                       |
| <i>SPAG4</i>    | 2.182  | 0.021 | 2.413  | 0.012 | Ji et al., Oncol Rep. 2018           | <a href="https://doi.org/10.3892/or.2018.6473">https://doi.org/10.3892/or.2018.6473</a>               |
| <i>SPATA18</i>  | -2.714 | 0.010 | -3.020 | 0.005 | Okuyama et al., Sci Rep. 2019        | <a href="https://doi.org/10.1038/s41598-019-39563-x">https://doi.org/10.1038/s41598-019-39563-x</a>   |
| <i>TARS2</i>    | 3.210  | 0.035 | 3.080  | 0.042 | No data                              |                                                                                                       |
| <i>TERF2IP</i>  | -1.620 | 0.037 | -1.634 | 0.036 | No data                              |                                                                                                       |
| <i>TFAP4</i>    | -2.896 | 0.020 | -3.408 | 0.008 | Huang et al., Dis Markers. 2019      | <a href="https://doi.org/10.1155/2019/7129214">https://doi.org/10.1155/2019/7129214</a>               |
| <i>TFB1M</i>    | -2.403 | 0.005 | -1.694 | 0.038 | No data                              |                                                                                                       |
| <i>TFF3</i>     | 3.555  | 0.010 | 2.816  | 0.034 | Yusufu et al., Int J Oncol. 2019     | <a href="https://doi.org/10.3892/ijo.2019.4854">https://doi.org/10.3892/ijo.2019.4854</a>             |
| <i>TGFB11I</i>  | -2.968 | 0.024 | -2.650 | 0.041 | Gulvady et al., Mol Biol Cell. 2018  | <a href="https://doi.org/10.1091/mbc.E18-02-0092">https://doi.org/10.1091/mbc.E18-02-0092</a>         |
| <i>THEMIS</i>   | -1.695 | 0.039 | -1.683 | 0.040 | No data                              |                                                                                                       |
| <i>TNFAIP1</i>  | 1.563  | 0.047 | 1.721  | 0.030 | Xiao et al., EBioMedicine. 2020      | <a href="https://doi.org/10.1016/j.ebiom.2019.102603">https://doi.org/10.1016/j.ebiom.2019.102603</a> |
| <i>TUBE1</i>    | -3.212 | 0.042 | -4.450 | 0.007 | No data                              |                                                                                                       |

|                |        |       |        |       |                                   |                                                                                                   |
|----------------|--------|-------|--------|-------|-----------------------------------|---------------------------------------------------------------------------------------------------|
| <i>TXNDC8</i>  | 1.415  | 0.016 | 1.283  | 0.026 | No data                           |                                                                                                   |
| <i>ULK4P3</i>  | -2.751 | 0.047 | -2.974 | 0.033 | No data                           |                                                                                                   |
| <i>UNC5B</i>   | 2.209  | 0.030 | 2.390  | 0.020 | Kong et al., BMC Cancer. 2016     | <a href="https://doi.org/10.1186/s12885-016-2922-9">https://doi.org/10.1186/s12885-016-2922-9</a> |
| <i>WWP1</i>    | 2.420  | 0.013 | 2.172  | 0.023 | Goto et al., Br J Cancer. 2016    | <a href="https://doi.org/10.1038/bjc.2016.95">https://doi.org/10.1038/bjc.2016.95</a>             |
| <i>ZKSCAN2</i> | 2.270  | 0.045 | 3.318  | 0.006 | Kawahara et al., Oncotarget. 2016 | <a href="https://doi.org/10.18632/oncotarget.10679">https://doi.org/10.18632/oncotarget.10679</a> |
| <i>ZNF285</i>  | -2.784 | 0.022 | -3.377 | 0.007 | No data                           |                                                                                                   |
| <i>ZNF567</i>  | 2.557  | 0.020 | 2.136  | 0.047 | No data                           |                                                                                                   |
| <i>ZNRF1</i>   | -2.437 | 0.027 | -2.529 | 0.023 | No data                           |                                                                                                   |

---



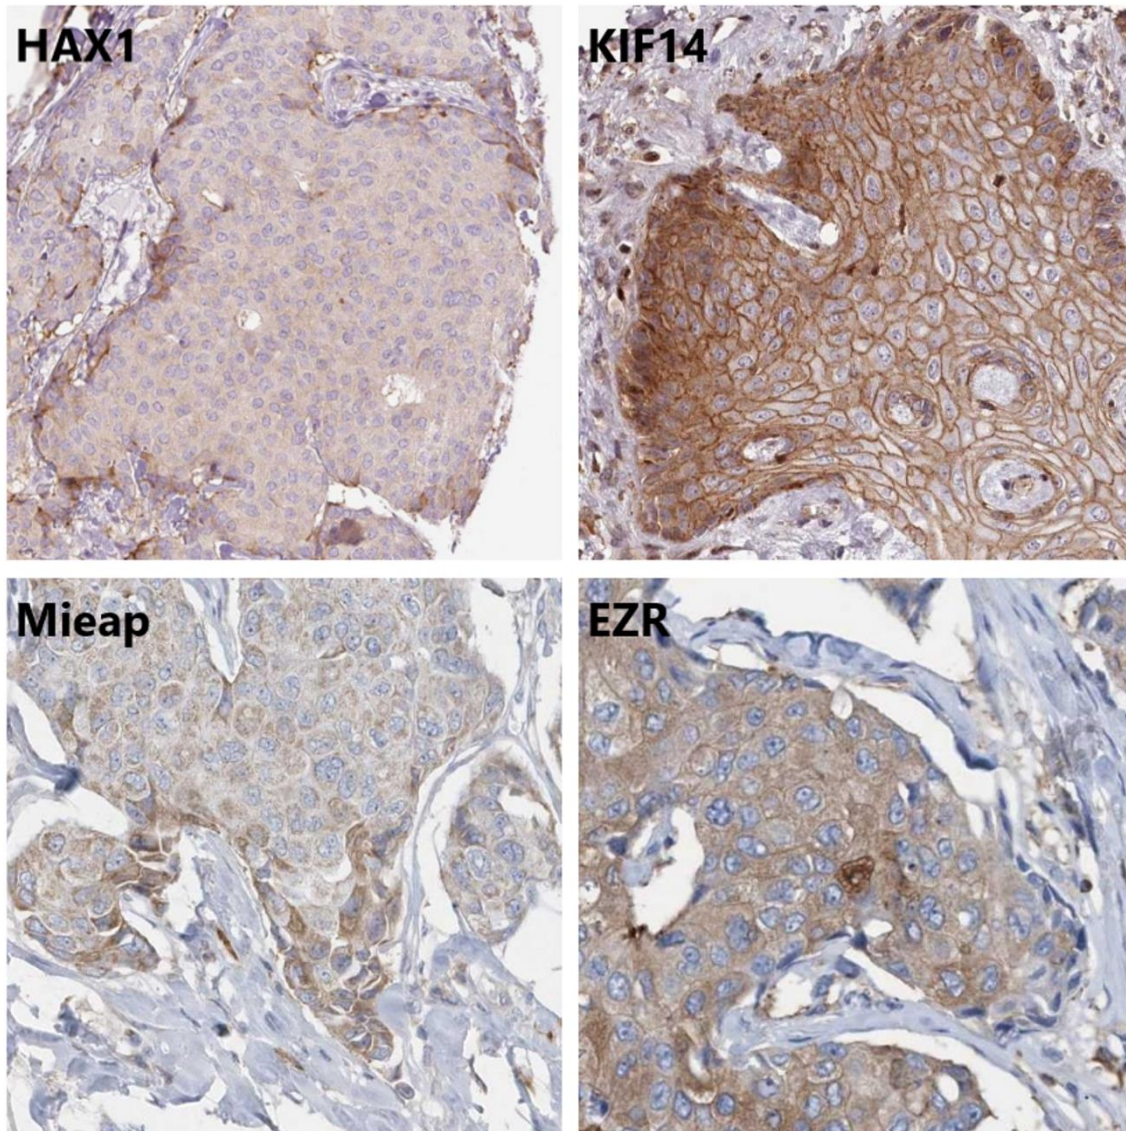

**Figure S1.** Expression of HAX1, KIF14, Mieap and EZR proteins in breast cancer (according to the Human Protein Atlas). HAX1 is predominantly expressed at the periphery of solid structure. Positive expression of KIF14 and Mieap and negative expression of EZR are observed at the tips of the solid structures.



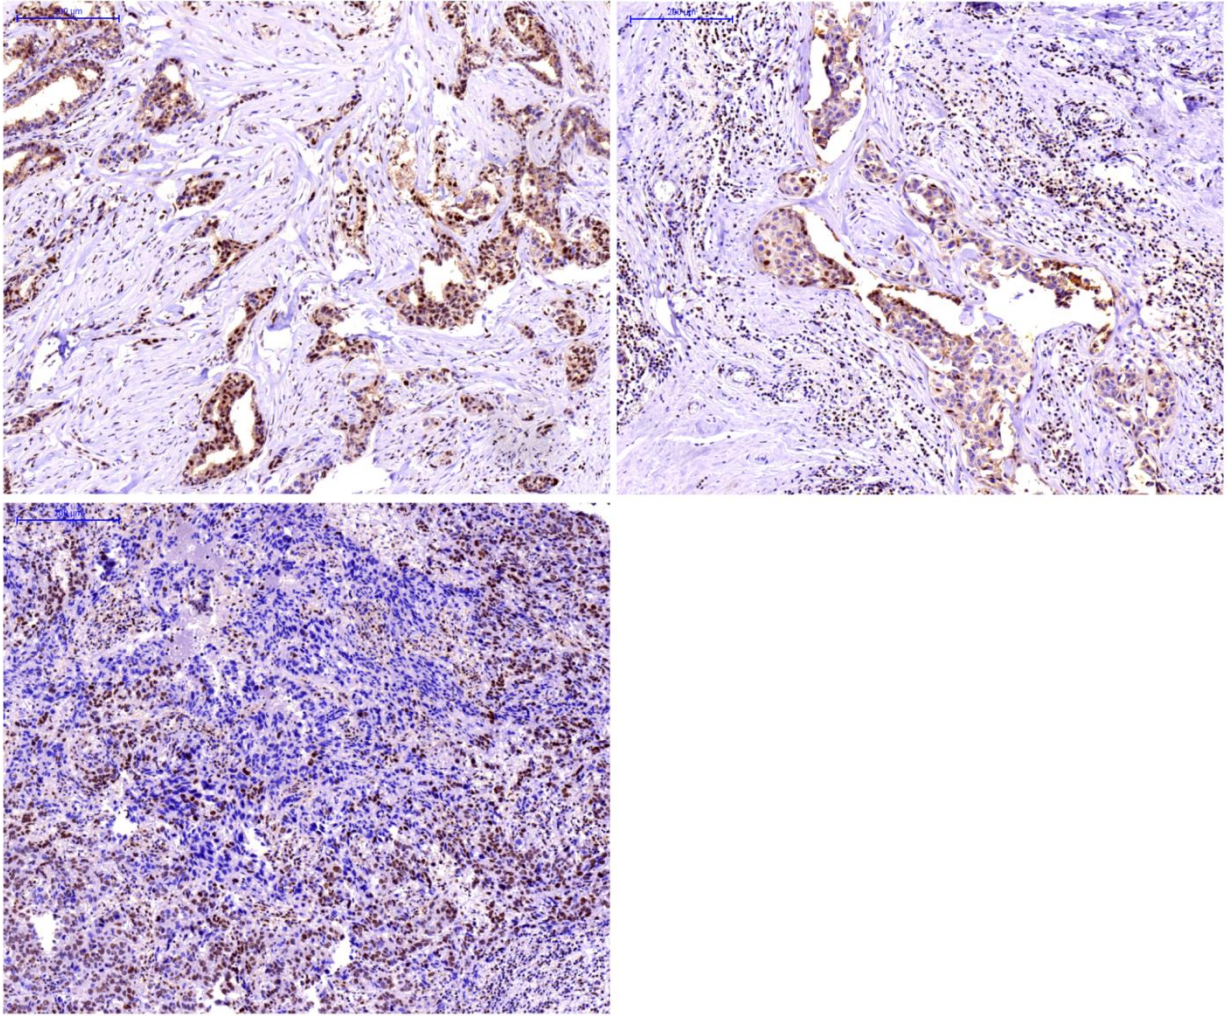

**Figure S2.** Immunohistochemical staining for KIF14 in breast cancers. 200x magnification.



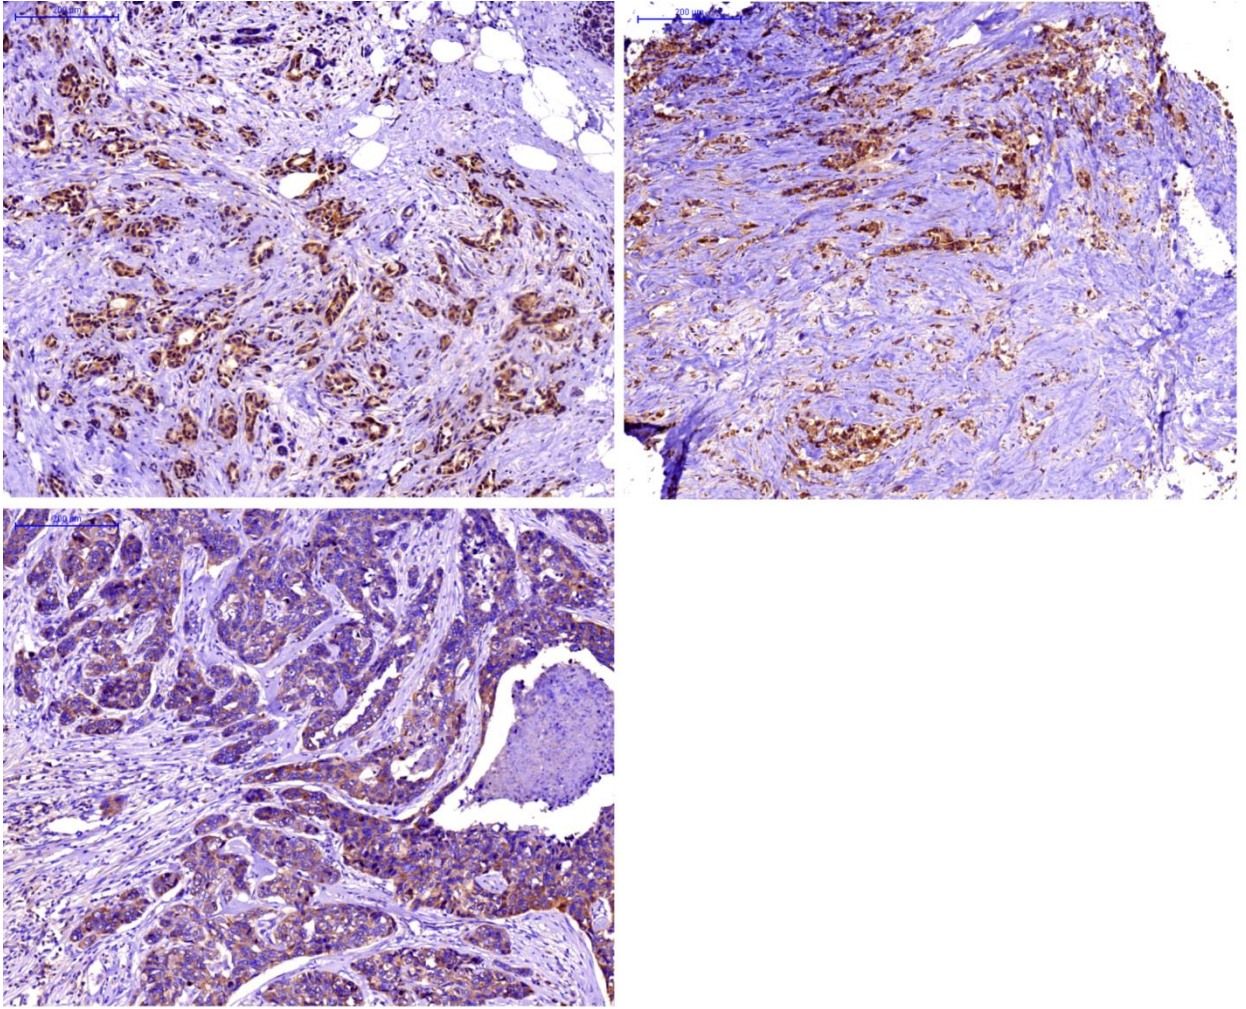

**Figure S3.** Immunohistochemical staining for Micap in breast cancers. 200x magnification.



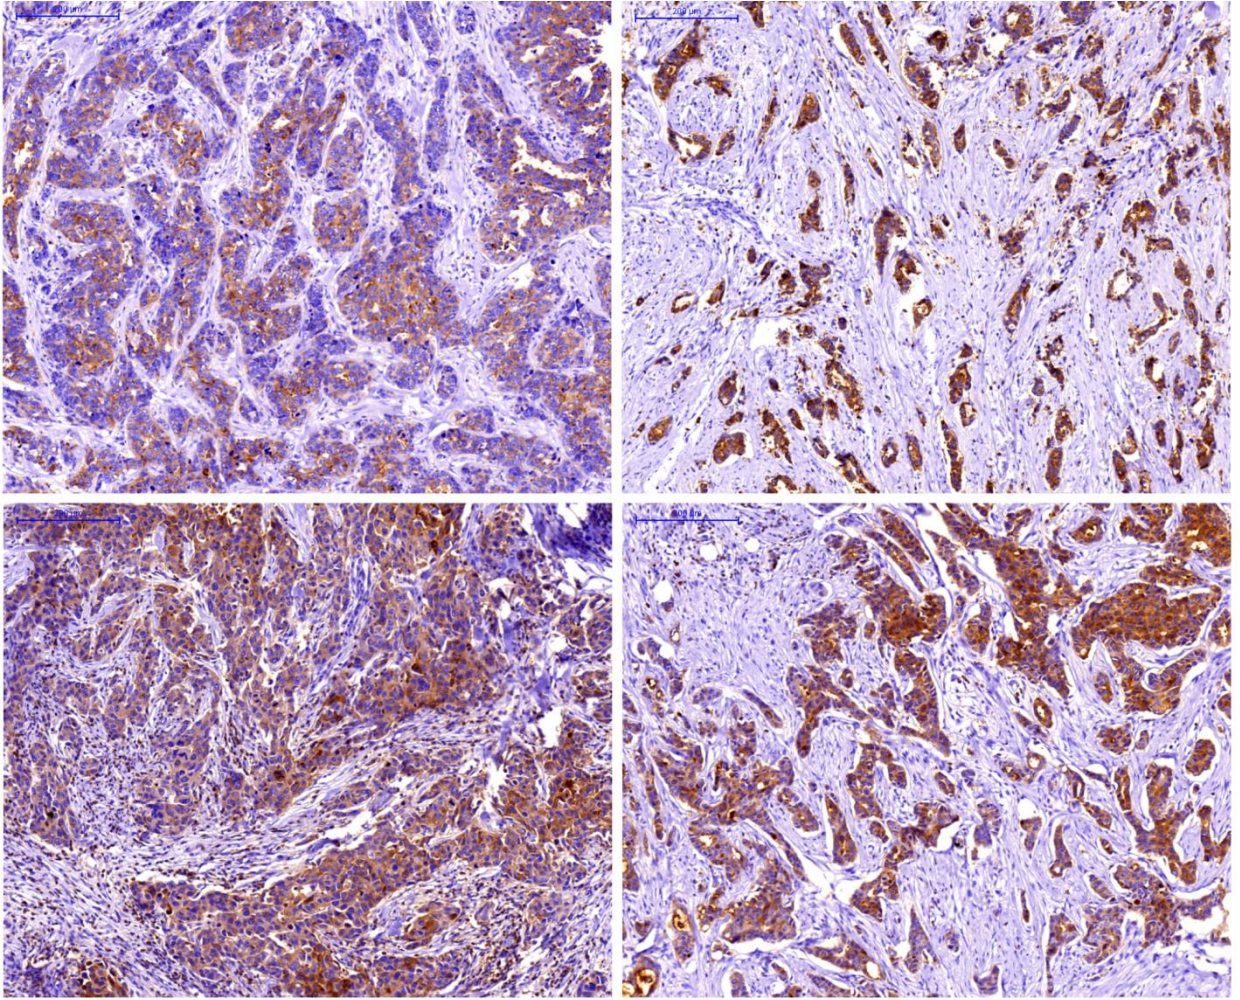

**Figure S4.** Immunohistochemical staining for EZR in breast cancers. 200x magnification.

**Table S4.** The frequency of nuclear expression of KIF14 in different morphological structures of breast tumors

|   | Morphological structures                                                 | Number of cases (%)                                                                                                                            |
|---|--------------------------------------------------------------------------|------------------------------------------------------------------------------------------------------------------------------------------------|
| 1 | Single tumor cells                                                       | 27/69 (39.1)<br>p <sub>2</sub> =0.05<br>p <sub>3</sub> =0.02                                                                                   |
| 2 | At the tips of torpedo-like sprouts associated with solid structures     | 26/48 (54.2)                                                                                                                                   |
| 3 | At the tips of torpedo-like structures (separated from solid structures) | 21/35 (60.0)                                                                                                                                   |
| 4 | At the periphery of solid structures                                     | 37/71 (52.1)                                                                                                                                   |
| 5 | At the periphery of alveolar structures                                  | 35/67 (52.2)                                                                                                                                   |
| 6 | At the periphery of trabecular structures                                | 33/36 (91.7)<br>p <sub>1</sub> =0.0000<br>p <sub>2</sub> =0.0001<br>p <sub>3</sub> =0.0008<br>p <sub>4</sub> =0.0000<br>p <sub>5</sub> =0.0000 |
| 7 | At the periphery of tubular structures                                   | 14/16 (87.5)<br>p <sub>1</sub> =0.0002<br>p <sub>2</sub> =0.007<br>p <sub>3</sub> =0.02<br>p <sub>4</sub> =0.004<br>p <sub>5</sub> =0.004      |

p<sub>1-5</sub>, comparison between different structures (1-5); Chi-square test

**Table S5.** The frequency of cytoplasmic expression of Mieap in different morphological structures of breast tumors

|   | Morphological structures                                                 | Number of cases (%)                                                                    |
|---|--------------------------------------------------------------------------|----------------------------------------------------------------------------------------|
| 1 | Single tumor cells                                                       | 30/70 (42.8)                                                                           |
| 2 | At the tips of torpedo-like sprouts associated with solid structures     | 24/49 (48.9)                                                                           |
| 3 | At the tips of torpedo-like structures (separated from solid structures) | 20/36 (55.5)                                                                           |
| 4 | At the periphery of solid structures                                     | 29/72 (40.2)                                                                           |
| 5 | At the periphery of alveolar structures                                  | 30/68 (44.1)                                                                           |
| 6 | At the periphery of trabecular structures                                | 29/39 (74.3)<br>$p_1=0.0009$<br>$p_2=0.008$<br>$p_3=0.05$<br>$p_4=0.003$<br>$p_5=0.01$ |
| 7 | At the periphery of tubular structures                                   | 10/16 (62.5)<br>$p_4=0.04$                                                             |

$p_{1-5}$ , comparison between different structures (1-5); Chi-square test

**Table S6.** The frequency of negative cytoplasmic expression of EZR in different morphological structures of breast tumors

|   | Morphological structures                                                 | Number of cases (%)                                                                     |
|---|--------------------------------------------------------------------------|-----------------------------------------------------------------------------------------|
| 1 | Single tumor cells                                                       | 33/66 (50.0)                                                                            |
| 2 | At the tips of torpedo-like sprouts associated with solid structures     | 25/45 (55.5)                                                                            |
| 3 | At the tips of torpedo-like structures (separated from solid structures) | 19/34 (55.9)                                                                            |
| 4 | At the periphery of solid structures                                     | 36/69 (52.2)                                                                            |
| 5 | At the periphery of alveolar structures                                  | 19/35 (54.3)                                                                            |
| 6 | At the periphery of trabecular structures                                | 28/34 (82.3)<br>$p_1=0.0009$<br>$p_2=0.007$<br>$p_3=0.01$<br>$p_4=0.002$<br>$p_5=0.006$ |
| 7 | Tubular structures                                                       | 15/17 (88.2)<br>$p_1=0.002$<br>$p_2=0.009$<br>$p_3=0.01$<br>$p_4=0.003$<br>$p_5=0.007$  |

$p_{1-5}$ , comparison between different structures (1-5); Chi-square test

**Table S7.** Differentially expressed genes between KIF14-positive and KIF14-negative cells located in torpedo-like structures ( $p < 0.05$ )

| Gene                | P-value | LogFC   |
|---------------------|---------|---------|
| <i>SLITRK6</i>      | 0.000   | -22.277 |
| <i>NHS</i>          | 0.000   | 8.725   |
| <i>CNOT2-DT</i>     | 0.000   | 7.941   |
| <i>CLIP4</i>        | 0.001   | 7.223   |
| <i>LOC101928728</i> | 0.001   | 8.473   |
| <i>THBS4</i>        | 0.002   | 6.420   |
| <i>DDHD1</i>        | 0.002   | -5.906  |
| <i>LUM</i>          | 0.002   | -5.989  |
| <i>GPRIN1</i>       | 0.002   | 5.594   |
| <i>HIF1A-AS3</i>    | 0.002   | 7.172   |
| <i>PIK3CB</i>       | 0.003   | -4.657  |
| <i>UGT8</i>         | 0.003   | 6.986   |
| <i>ARL13A</i>       | 0.003   | 6.792   |
| <i>ATPAF2</i>       | 0.003   | -5.752  |
| <i>LRRC26</i>       | 0.004   | 5.290   |
| <i>GPR87</i>        | 0.004   | 6.137   |
| <i>RBM12B</i>       | 0.004   | -4.698  |
| <i>PRICKLE2</i>     | 0.004   | -5.305  |
| <i>DENND5B</i>      | 0.004   | -5.869  |
| <i>CROT</i>         | 0.004   | -5.644  |
| <i>ZNF761</i>       | 0.004   | -4.858  |
| <i>TMEM175</i>      | 0.005   | -5.734  |
| <i>DCHS2</i>        | 0.005   | 5.624   |
| <i>GTF2E1</i>       | 0.005   | -5.567  |
| <i>EYA1</i>         | 0.005   | -6.392  |
| <i>KIF21A</i>       | 0.005   | -5.652  |
| <i>RALB</i>         | 0.005   | -5.550  |
| <i>NEURL1</i>       | 0.005   | 7.024   |
| <i>ARPC5L</i>       | 0.005   | -5.536  |
| <i>C2orf66</i>      | 0.006   | 7.442   |
| <i>ADGRG7</i>       | 0.006   | 7.442   |
| <i>EPHB1</i>        | 0.006   | 7.442   |
| <i>CPN1</i>         | 0.006   | 7.442   |
| <i>MYADM</i>        | 0.006   | -5.601  |
| <i>PLA2G7</i>       | 0.006   | 6.576   |
| <i>CALD1</i>        | 0.006   | -3.831  |
| <i>DPT</i>          | 0.008   | 6.774   |
| <i>PLCL1</i>        | 0.008   | -6.319  |
| <i>PSAPL1</i>       | 0.008   | 6.957   |
| <i>TRIM38</i>       | 0.008   | -5.336  |
| <i>PLA2G4F</i>      | 0.008   | 4.146   |
| <i>LOC105369779</i> | 0.010   | 6.630   |
| <i>FAM102B</i>      | 0.010   | 4.540   |
| <i>XKR5</i>         | 0.010   | 7.064   |
| <i>PITRM1-AS1</i>   | 0.010   | 7.064   |
| <i>BCL2A1</i>       | 0.010   | 7.064   |
| <i>MAMDC2-AS1</i>   | 0.010   | 6.423   |

|                  |       |        |
|------------------|-------|--------|
| <i>PLCB4</i>     | 0.010 | -5.201 |
| <i>ZNF460</i>    | 0.011 | -4.177 |
| <i>NAPB</i>      | 0.011 | -5.202 |
| <i>MSANTD1</i>   | 0.011 | 6.262  |
| <i>LEPROT</i>    | 0.011 | -4.477 |
| <i>METTL6</i>    | 0.012 | -5.210 |
| <i>THBS2</i>     | 0.012 | -4.013 |
| <i>CYP4F8</i>    | 0.012 | -5.747 |
| <i>C17orf58</i>  | 0.013 | -5.114 |
| <i>ADAMTS7</i>   | 0.013 | 6.692  |
| <i>DTNA</i>      | 0.013 | -5.138 |
| <i>RBM48</i>     | 0.013 | -5.334 |
| <i>DDX20</i>     | 0.013 | -5.159 |
| <i>INPP5J</i>    | 0.013 | -4.556 |
| <i>DLC1</i>      | 0.013 | 5.076  |
| <i>USP46</i>     | 0.014 | -4.618 |
| <i>LINC00635</i> | 0.014 | 6.831  |
| <i>TRPC7</i>     | 0.014 | 6.831  |
| <i>LTA</i>       | 0.014 | 6.831  |
| <i>KRTAP13-4</i> | 0.014 | 6.831  |
| <i>EPHB6</i>     | 0.014 | 5.616  |
| <i>C1orf105</i>  | 0.015 | 6.228  |
| <i>BMP2K</i>     | 0.015 | -4.558 |
| <i>POT1</i>      | 0.015 | -5.083 |
| <i>QDPR</i>      | 0.015 | -5.517 |
| <i>VPS29</i>     | 0.015 | -4.826 |
| <i>SNAPC1</i>    | 0.015 | -5.149 |
| <i>PGAM5</i>     | 0.015 | -5.070 |
| <i>SAP30L</i>    | 0.015 | -4.447 |
| <i>IL1RN</i>     | 0.015 | 6.171  |
| <i>CXorf56</i>   | 0.016 | -5.047 |
| <i>DGAT1</i>     | 0.016 | 3.952  |
| <i>ANTKMT</i>    | 0.016 | -5.028 |
| <i>LIMD1</i>     | 0.016 | -3.737 |
| <i>SEC61A2</i>   | 0.016 | -5.088 |
| <i>ERCC4</i>     | 0.017 | -5.131 |
| <i>TLL2</i>      | 0.017 | 6.538  |
| <i>FCGBP</i>     | 0.017 | -4.525 |
| <i>PVT1</i>      | 0.017 | -5.537 |
| <i>SLC26A2</i>   | 0.017 | -5.081 |
| <i>CINP</i>      | 0.018 | -4.998 |
| <i>ASTN2</i>     | 0.018 | -5.407 |
| <i>ST7L</i>      | 0.018 | -4.985 |
| <i>LAP3</i>      | 0.018 | -3.951 |
| <i>AIP</i>       | 0.019 | 3.591  |
| <i>ZNF273</i>    | 0.019 | -4.026 |
| <i>CDH6</i>      | 0.019 | 6.472  |
| <i>ZNF726</i>    | 0.019 | -5.149 |
| <i>CYP2U1</i>    | 0.020 | 6.307  |
| <i>KIAA0930</i>  | 0.020 | -4.112 |

|                   |       |        |
|-------------------|-------|--------|
| <i>B4GALT6</i>    | 0.020 | 6.091  |
| <i>AKR7A3</i>     | 0.021 | -5.242 |
| <i>NFATC1</i>     | 0.021 | -4.878 |
| <i>CAMP</i>       | 0.021 | 6.402  |
| <i>EDN2</i>       | 0.021 | 6.555  |
| <i>IVL</i>        | 0.021 | 6.555  |
| <i>GAL3ST4</i>    | 0.021 | 6.555  |
| <i>AGAP4</i>      | 0.021 | 6.555  |
| <i>CCDC196</i>    | 0.021 | 6.555  |
| <i>ADGRG3</i>     | 0.021 | 6.555  |
| <i>B4GAT1</i>     | 0.022 | 5.163  |
| <i>CDAN1</i>      | 0.022 | 3.286  |
| <i>MIR3136</i>    | 0.022 | 6.519  |
| <i>RAD51B</i>     | 0.022 | -4.903 |
| <i>SLC49A3</i>    | 0.022 | -4.943 |
| <i>CSGALNACT1</i> | 0.022 | -4.510 |
| <i>ASCC2</i>      | 0.023 | -4.195 |
| <i>HMGN4</i>      | 0.023 | -4.903 |
| <i>SNHG3</i>      | 0.023 | -4.976 |
| <i>N4BP3</i>      | 0.023 | 3.499  |
| <i>ATP6AP1L</i>   | 0.023 | -3.818 |
| <i>MGAT5</i>      | 0.023 | -3.534 |
| <i>STAM</i>       | 0.023 | -4.845 |
| <i>CRY1</i>       | 0.023 | -4.861 |
| <i>EEF1A2</i>     | 0.024 | -5.047 |
| <i>CCDC61</i>     | 0.024 | -4.833 |
| <i>MAB21L2</i>    | 0.024 | -4.899 |
| <i>ATF3</i>       | 0.024 | -4.911 |
| <i>TBC1D8B</i>    | 0.024 | -5.028 |
| <i>NOS1AP</i>     | 0.024 | -4.506 |
| <i>TMEM169</i>    | 0.024 | 4.867  |
| <i>KIF1A</i>      | 0.025 | 6.318  |
| <i>RGP1</i>       | 0.025 | -4.088 |
| <i>NAPRT</i>      | 0.026 | 5.682  |
| <i>NEDD1</i>      | 0.027 | -5.206 |
| <i>MMP13</i>      | 0.027 | -5.336 |
| <i>ALDH1A1</i>    | 0.027 | 5.857  |
| <i>ZNF519</i>     | 0.028 | -4.868 |
| <i>LCPI</i>       | 0.028 | -4.780 |
| <i>SLC15A2</i>    | 0.028 | -4.819 |
| <i>PARP12</i>     | 0.029 | -4.126 |
| <i>EIF2B3</i>     | 0.029 | -4.728 |
| <i>CREBL2</i>     | 0.029 | -4.290 |
| <i>TMEM170B</i>   | 0.029 | 4.354  |
| <i>GLI4</i>       | 0.029 | 4.170  |
| <i>EIF4ENIF1</i>  | 0.029 | -4.416 |
| <i>BET1</i>       | 0.030 | -4.024 |
| <i>TMEM41B</i>    | 0.030 | -3.824 |
| <i>TSBP1</i>      | 0.030 | 5.596  |
| <i>RAB18</i>      | 0.030 | -3.087 |



|                   |       |        |
|-------------------|-------|--------|
| <i>ASB7</i>       | 0.031 | -4.715 |
| <i>CLCA2</i>      | 0.031 | 6.189  |
| <i>ACYP2</i>      | 0.031 | 5.729  |
| <i>ZFHX4</i>      | 0.031 | -4.859 |
| <i>NDUFAF1</i>    | 0.031 | -4.700 |
| <i>SDHAF1</i>     | 0.031 | -4.702 |
| <i>NAA10</i>      | 0.031 | 5.233  |
| <i>RPL22L1</i>    | 0.032 | -4.795 |
| <i>ZSCAN9</i>     | 0.032 | -4.680 |
| <i>TLE6</i>       | 0.033 | 4.771  |
| <i>VCX</i>        | 0.033 | 5.545  |
| <i>ZRANB3</i>     | 0.033 | -4.768 |
| <i>ENC1</i>       | 0.033 | -3.147 |
| <i>VPS9D1</i>     | 0.034 | 4.028  |
| <i>FGFR1</i>      | 0.034 | 3.521  |
| <i>ZNF571-AS1</i> | 0.034 | -4.529 |
| <i>VRK1</i>       | 0.034 | -4.665 |
| <i>GMPS</i>       | 0.034 | -3.475 |
| <i>TUBGCP5</i>    | 0.034 | -3.967 |
| <i>SCNM1</i>      | 0.035 | -4.745 |
| <i>CRIP1</i>      | 0.035 | -4.412 |
| <i>LY6G5B</i>     | 0.035 | 5.756  |
| <i>CLDN19</i>     | 0.035 | 6.216  |
| <i>PRR9</i>       | 0.035 | 6.216  |
| <i>OTOL1</i>      | 0.035 | 6.216  |
| <i>LINC02015</i>  | 0.035 | 6.216  |
| <i>PDE6A</i>      | 0.035 | 6.216  |
| <i>RS1</i>        | 0.035 | 6.216  |
| <i>MROH5</i>      | 0.035 | 6.216  |
| <i>SH2D4B</i>     | 0.035 | 6.216  |
| <i>SLC10A2</i>    | 0.035 | 6.216  |
| <i>KCNH5</i>      | 0.035 | 6.216  |
| <i>GCNT3</i>      | 0.035 | 6.216  |
| <i>LINC01255</i>  | 0.035 | 6.216  |
| <i>PLA2G4C</i>    | 0.035 | 6.216  |
| <i>TGIF2LY</i>    | 0.035 | 6.216  |
| <i>TOP3B</i>      | 0.035 | 6.216  |
| <i>ZSCAN22</i>    | 0.035 | -4.682 |
| <i>B3GALT2</i>    | 0.035 | -4.650 |
| <i>DFFA</i>       | 0.036 | -4.141 |
| <i>IFT27</i>      | 0.036 | -4.658 |
| <i>EDARADD</i>    | 0.036 | -5.528 |
| <i>LINS1</i>      | 0.037 | -4.166 |
| <i>SIRPA</i>      | 0.037 | -4.636 |
| <i>IPMK</i>       | 0.037 | -4.631 |
| <i>USP45</i>      | 0.037 | -4.046 |
| <i>PLEKHG6</i>    | 0.037 | 3.310  |
| <i>LINC01608</i>  | 0.037 | 6.069  |
| <i>FAM86DP</i>    | 0.039 | -4.769 |
| <i>RAB11FIP5</i>  | 0.039 | -4.597 |

|                     |       |        |
|---------------------|-------|--------|
| <i>COL2A1</i>       | 0.039 | 5.579  |
| <i>ARVCF</i>        | 0.039 | -3.402 |
| <i>SSH2</i>         | 0.039 | -4.155 |
| <i>UNKL</i>         | 0.039 | 2.608  |
| <i>LOC100129484</i> | 0.039 | -4.687 |
| <i>RGS1</i>         | 0.040 | -4.659 |
| <i>FAM200A</i>      | 0.040 | -4.575 |
| <i>NETO2</i>        | 0.040 | 6.023  |
| <i>CAMK1D</i>       | 0.040 | 4.303  |
| <i>CYP20A1</i>      | 0.041 | -3.263 |
| <i>BBS5</i>         | 0.041 | -4.579 |
| <i>KCNK5</i>        | 0.041 | 6.011  |
| <i>ANXA3</i>        | 0.041 | -4.977 |
| <i>PPA1</i>         | 0.041 | -4.042 |
| <i>SCUBE3</i>       | 0.041 | -4.977 |
| <i>PROS1</i>        | 0.042 | 4.855  |
| <i>CTTNBP2</i>      | 0.042 | -4.909 |
| <i>PPRC1</i>        | 0.042 | -3.940 |
| <i>CSRNP2</i>       | 0.042 | -3.233 |
| <i>SOCS6</i>        | 0.042 | -3.746 |
| <i>GET1</i>         | 0.042 | 4.264  |
| <i>KLK14</i>        | 0.043 | -5.400 |
| <i>SLC9A2</i>       | 0.043 | -5.031 |
| <i>NRAS</i>         | 0.043 | -3.599 |
| <i>GALNT3</i>       | 0.043 | -4.461 |
| <i>CSF1R</i>        | 0.043 | -4.652 |
| <i>YPEL5</i>        | 0.043 | -3.124 |
| <i>ZBTB26</i>       | 0.043 | -4.509 |
| <i>ASNS</i>         | 0.044 | 4.668  |
| <i>PDE5A</i>        | 0.044 | -4.546 |
| <i>RNVU1-7</i>      | 0.044 | 5.410  |
| <i>S1PR3</i>        | 0.044 | -4.874 |
| <i>FAM71F2</i>      | 0.044 | 4.839  |
| <i>KIAA0319</i>     | 0.044 | 5.468  |
| <i>EEF1E1</i>       | 0.044 | 3.848  |
| <i>PCNP</i>         | 0.044 | -3.357 |
| <i>PDZD11</i>       | 0.044 | -4.201 |
| <i>ZNF639</i>       | 0.044 | -4.543 |
| <i>FBLIM1</i>       | 0.045 | -4.511 |
| <i>TXNDC15</i>      | 0.045 | -4.554 |
| <i>ZNF876P</i>      | 0.045 | 4.421  |
| <i>MAPK14</i>       | 0.045 | -3.050 |
| <i>QTRT1</i>        | 0.046 | -4.499 |
| <i>PKDREJ</i>       | 0.046 | 5.320  |
| <i>TRIM44</i>       | 0.046 | -2.630 |
| <i>PPA2</i>         | 0.046 | -2.867 |
| <i>DNAJC14</i>      | 0.046 | -4.575 |
| <i>DNAJC22</i>      | 0.047 | -4.868 |
| <i>PCSK1</i>        | 0.047 | 5.155  |
| <i>KANK1</i>        | 0.047 | -4.188 |

|                  |       |        |
|------------------|-------|--------|
| <i>ZFR</i>       | 0.047 | -2.608 |
| <i>PSMG3</i>     | 0.048 | -4.489 |
| <i>PTPRC</i>     | 0.048 | -4.515 |
| <i>ARVI</i>      | 0.048 | -3.930 |
| <i>DYNLT3</i>    | 0.048 | -3.983 |
| <i>TBX3</i>      | 0.048 | -5.302 |
| <i>ZNF438</i>    | 0.048 | -4.617 |
| <i>GSTCD-AS1</i> | 0.049 | 5.983  |
| <i>CCDC87</i>    | 0.049 | 5.983  |
| <i>C12orf71</i>  | 0.049 | 5.983  |
| <i>ZNF136</i>    | 0.049 | -4.276 |
| <i>TBP</i>       | 0.049 | -4.831 |
| <i>POLR1E</i>    | 0.049 | 3.419  |

---

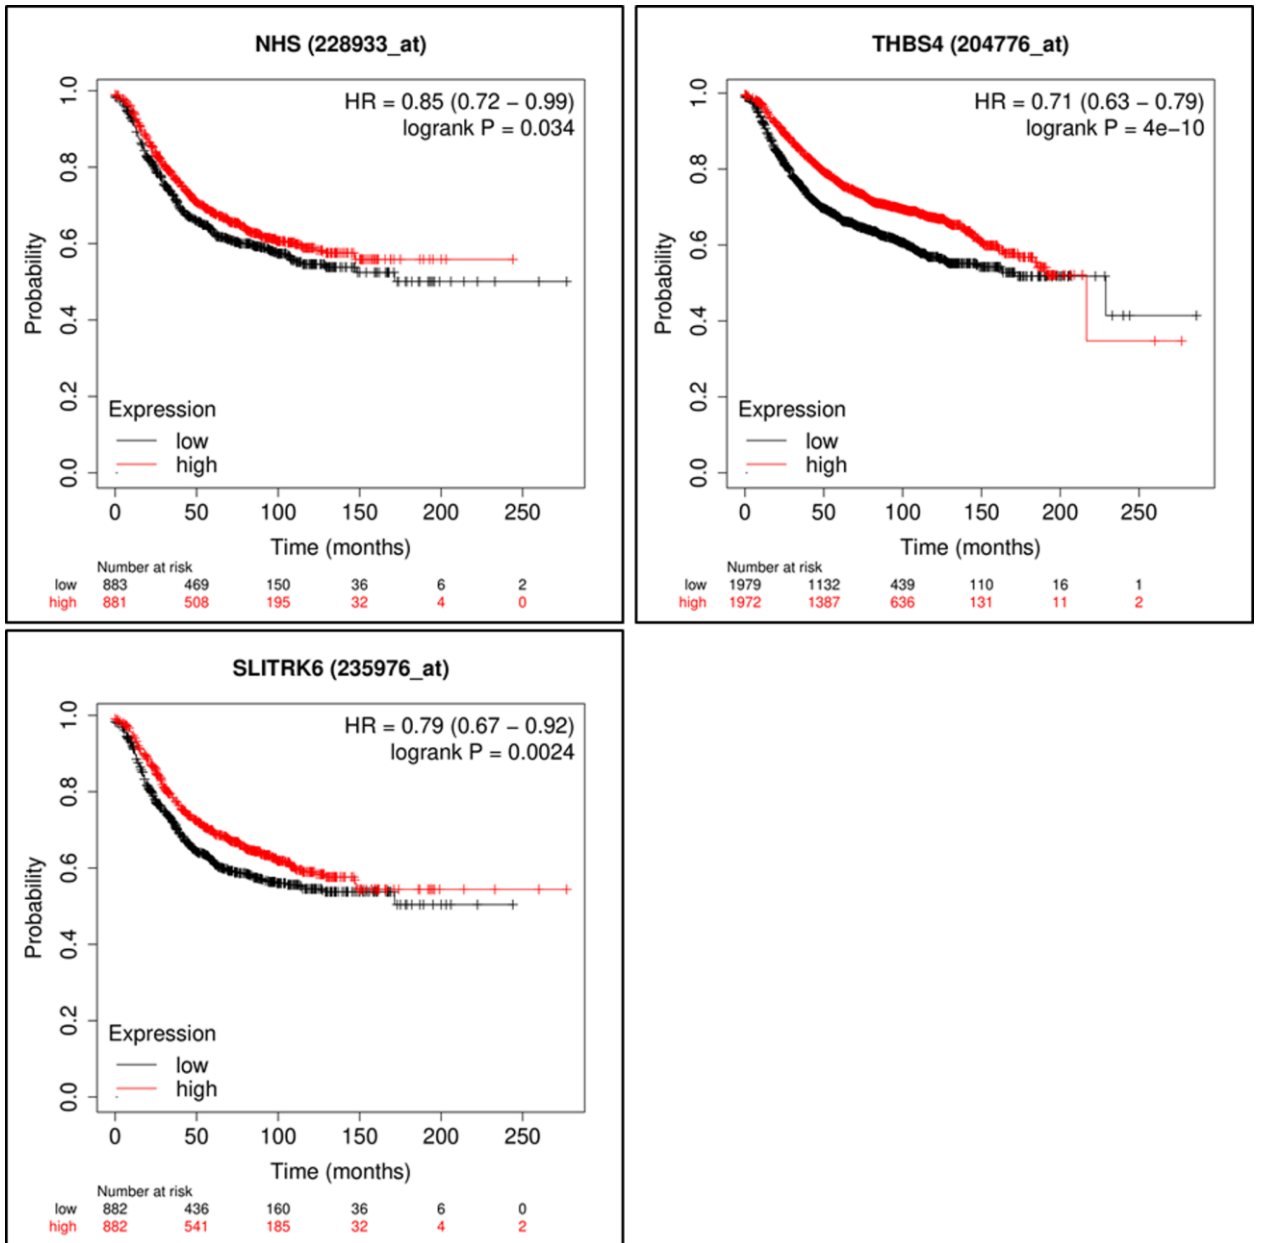

**Figure S5.** Association of DEGs (*NHC*, *THBS4* and *SLITRK6*) in KIF14-positive cells with relapse-free survival of breast cancer patients according to Kaplan-Meier Plotter database.

**Table S8.** KEGG enrichment analysis of up- and down-regulated genes in KIF14-positive cells located in torpedo-like structures (p < 0.05)

| Term                                                     | P-value | Adjusted P-value | Genes                                                     |
|----------------------------------------------------------|---------|------------------|-----------------------------------------------------------|
| VEGF signaling pathway                                   | 0.001   | 0.311            | <i>PLA2G4F; NRAS; PLA2G4C; PIK3CB; MAPK14</i>             |
| Fc epsilon RI signaling pathway                          | 0.002   | 0.294            | <i>PLA2G4F; NRAS; PLA2G4C; PIK3CB; MAPK14</i>             |
| Ether lipid metabolism                                   | 0.003   | 0.330            | <i>UGT8; PLA2G4F; PLA2G4C; PLA2G7</i>                     |
| GnRH signaling pathway                                   | 0.007   | 0.565            | <i>PLA2G4F; NRAS; PLCB4; PLA2G4C; MAPK14</i>              |
| Long-term depression                                     | 0.008   | 0.474            | <i>PLA2G4F; NRAS; PLCB4; PLA2G4C</i>                      |
| Arachidonic acid metabolism                              | 0.009   | 0.468            | <i>PLA2G4F; CYP2U1; PLA2G4C; CYP4F8</i>                   |
| AGE-RAGE signaling pathway in diabetic complications     | 0.010   | 0.435            | <i>NRAS; PLCB4; NFATC1; PIK3CB; MAPK14</i>                |
| Inflammatory mediator regulation of TRP channels         | 0.010   | 0.381            | <i>PLA2G4F; PLCB4; PLA2G4C; PIK3CB; MAPK14</i>            |
| T cell receptor signaling pathway                        | 0.010   | 0.352            | <i>NRAS; PTPRC; NFATC1; PIK3CB; MAPK14</i>                |
| Acute myeloid leukemia                                   | 0.011   | 0.330            | <i>CSF1R; NRAS; BCL2A1; PIK3CB</i>                        |
| Phospholipase D signaling pathway                        | 0.013   | 0.363            | <i>PLA2G4F; NRAS; PLCB4; RALB; PLA2G4C; PIK3CB</i>        |
| Prolactin signaling pathway                              | 0.013   | 0.336            | <i>NRAS; PIK3CB; SOCS6; MAPK14</i>                        |
| Oxytocin signaling pathway                               | 0.015   | 0.357            | <i>PLA2G4F; NRAS; CAMK1D; PLCB4; PLA2G4C; NFATC1</i>      |
| Inositol phosphate metabolism                            | 0.016   | 0.347            | <i>PLCB4; IPMK; INPP5J; PIK3CB</i>                        |
| Rap1 signaling pathway                                   | 0.018   | 0.379            | <i>CSF1R; NRAS; PLCB4; RALB; PIK3CB; MAPK14; FGFR1</i>    |
| Sphingolipid signaling pathway                           | 0.020   | 0.379            | <i>NRAS; PLCB4; SIPR3; PIK3CB; MAPK14</i>                 |
| Platelet activation                                      | 0.023   | 0.418            | <i>PLA2G4F; PLCB4; PLA2G4C; PIK3CB; MAPK14</i>            |
| Osteoclast differentiation                               | 0.025   | 0.432            | <i>CSF1R; SIRPA; NFATC1; PIK3CB; MAPK14</i>               |
| Relaxin signaling pathway                                | 0.028   | 0.447            | <i>NRAS; MMP13; PLCB4; PIK3CB; MAPK14</i>                 |
| Vascular smooth muscle contraction                       | 0.029   | 0.450            | <i>PLA2G4F; EDN2; PLCB4; CALD1; PLA2G4C</i>               |
| Fc gamma R-mediated phagocytosis                         | 0.031   | 0.454            | <i>PLA2G4F; PTPRC; ARPC5L; PIK3CB</i>                     |
| Ras signaling pathway                                    | 0.032   | 0.454            | <i>CSF1R; NRAS; PLA2G4F; RALB; PLA2G4C; PIK3CB; FGFR1</i> |
| Signaling pathways regulating pluripotency of stem cells | 0.035   | 0.473            | <i>NRAS; PIK3CB; MAPK14; TBX3; FGFR1</i>                  |

|                                          |       |       |                                       |
|------------------------------------------|-------|-------|---------------------------------------|
| Choline metabolism in cancer             | 0.040 | 0.517 | <i>PLA2G4F; NRAS; PLA2G4C; PIK3CB</i> |
| Phosphatidylinositol signaling system    | 0.040 | 0.496 | <i>PLCB4; IPMK; INPP5J; PIK3CB</i>    |
| alpha-Linolenic acid metabolism          | 0.042 | 0.492 | <i>PLA2G4F; PLA2G4C</i>               |
| C-type lectin receptor signaling pathway | 0.047 | 0.535 | <i>NRAS; NFATC1; PIK3CB; MAPK14</i>   |

---

A total of 105 upregulated and 155 downregulated genes have been analyzed

**Table S9.** GO enrichment analysis of up- and down-regulated genes in KIF14-positive cells located in torpedo-like structures (p < 0.05)

| Term                                                                         | P-value | Adjusted P-value | Genes                                                                                |
|------------------------------------------------------------------------------|---------|------------------|--------------------------------------------------------------------------------------|
| phosphate-containing compound metabolic process (GO:0006796)                 | 0.001   | 1.000            | <i>PLA2G4F; PTPRC; PLCB4; IPMK; PLA2G4C; INPP5J; ACYP2; PIK3CB; LIMD1</i>            |
| negative regulation of signal transduction (GO:0009968)                      | 0.001   | 1.000            | <i>EPHB6; KANK1; CSF1R; LEPROT; PTPRC; NEURL1; CRY1; KLK14; NFATC1; EPHB1; FGFR1</i> |
| negative regulation of DNA metabolic process (GO:0051053)                    | 0.002   | 1.000            | <i>ZRANB3; DFFA; CDAN1; ERCC4</i>                                                    |
| phosphatidylinositol metabolic process (GO:0046488)                          | 0.003   | 1.000            | <i>CSF1R; PLA2G4F; PLA2G4C; C2ORF66; INPP5J; PIK3CB</i>                              |
| positive regulation of kinase activity (GO:0033674)                          | 0.004   | 1.000            | <i>EPHB6; CSF1R; PTPRC; EEF1A2; EPHB1; FGFR1</i>                                     |
| regulation of cellular protein localization (GO:1903827)                     | 0.004   | 1.000            | <i>RALB; LCP1; RAB11FIP5</i>                                                         |
| positive regulation of voltage-gated potassium channel activity (GO:1903818) | 0.006   | 1.000            | <i>LRRC26; NOS1AP</i>                                                                |
| negative regulation of heterotypic cell-cell adhesion (GO:0034115)           | 0.006   | 1.000            | <i>IL1RN; MYADM</i>                                                                  |
| regulation of cell-cell adhesion involved in gastrulation (GO:0070587)       | 0.006   | 1.000            | <i>IL1RN; MYADM</i>                                                                  |
| collagen fibril organization (GO:0030199)                                    | 0.006   | 1.000            | <i>COL2A1; LUM; DPT</i>                                                              |
| keratan sulfate biosynthetic process (GO:0018146)                            | 0.006   | 1.000            | <i>B4GAT1; LUM; B4GALT6</i>                                                          |
| keratan sulfate metabolic process (GO:0042339)                               | 0.010   | 1.000            | <i>B4GAT1; LUM; B4GALT6</i>                                                          |
| PERK-mediated unfolded protein response (GO:0036499)                         | 0.010   | 1.000            | <i>ASNS; ATF3</i>                                                                    |
| extracellular matrix organization (GO:0030198)                               | 0.010   | 1.000            | <i>CSGALNACT1; SCUBE3; COL2A1; MMP13; LUM; DPT; TLL2; LCP1</i>                       |
| regulation of execution phase of apoptosis (GO:1900117)                      | 0.012   | 1.000            | <i>DFFA; DLC1</i>                                                                    |

|                                                                          |       |       |                                                  |
|--------------------------------------------------------------------------|-------|-------|--------------------------------------------------|
| negative regulation of Rho protein signal transduction (GO:0035024)      | 0.014 | 1.000 | <i>KANK1; DLC1</i>                               |
| inositol lipid-mediated signaling (GO:0048017)                           | 0.014 | 1.000 | <i>CSF1R; PIK3CB; FGFR1</i>                      |
| tRNA aminoacylation (GO:0043039)                                         | 0.015 | 1.000 | <i>PPA2; PPA1; EEF1E1</i>                        |
| regulation of clathrin-dependent endocytosis (GO:2000369)                | 0.016 | 1.000 | <i>BMP2K; PIK3CB</i>                             |
| protein O-linked glycosylation (GO:0006493)                              | 0.017 | 1.000 | <i>B4GAT1; GALNT3; B3GALT2; GCNT3; ADAMTS7</i>   |
| phosphatidylinositol acyl-chain remodeling (GO:0036149)                  | 0.018 | 1.000 | <i>PLA2G4F; PLA2G4C</i>                          |
| regulation of reactive oxygen species biosynthetic process (GO:1903426)  | 0.018 | 1.000 | <i>GPRIN1; NOS1AP</i>                            |
| response to ionizing radiation (GO:0010212)                              | 0.018 | 1.000 | <i>RAD51B; EYA1; ERCC4; MAPK14</i>               |
| negative regulation of cell communication (GO:0010648)                   | 0.019 | 1.000 | <i>EPHB6; CSF1R; EPHB1; FGFR1</i>                |
| extracellular matrix disassembly (GO:0022617)                            | 0.019 | 1.000 | <i>SCUBE3; MMP13; TLL2; LCP1</i>                 |
| regulation of telomere maintenance via telomere lengthening (GO:1904356) | 0.020 | 1.000 | <i>ERCC4; POT1</i>                               |
| DNA packaging (GO:0006323)                                               | 0.020 | 1.000 | <i>CDANI; NAA10</i>                              |
| detection of mechanical stimulus (GO:0050982)                            | 0.020 | 1.000 | <i>DENND5B; PKDREJ</i>                           |
| protein complex subunit organization (GO:0071822)                        | 0.021 | 1.000 | <i>COL2A1; LUM; DPT</i>                          |
| sulfur compound biosynthetic process (GO:0044272)                        | 0.022 | 1.000 | <i>CSGALNACT1; SLC26A2; B4GAT1; LUM; B4GALT6</i> |
| tRNA aminoacylation for protein translation (GO:0006418)                 | 0.022 | 1.000 | <i>PPA2; PPA1; EEF1E1</i>                        |
| DNA conformation change (GO:0071103)                                     | 0.022 | 1.000 | <i>TOP3B; NAA10</i>                              |
| negative regulation of signaling (GO:0023057)                            | 0.023 | 1.000 | <i>EPHB6; CSF1R; EPHB1; FGFR1</i>                |
| polyol metabolic process (GO:0019751)                                    | 0.023 | 1.000 | <i>PLCB4; IPMK; INPP5J</i>                       |
| inositol phosphate metabolic process (GO:0043647)                        | 0.023 | 1.000 | <i>PLCB4; IPMK; INPP5J</i>                       |



|                                                                                          |       |       |                                                                                          |
|------------------------------------------------------------------------------------------|-------|-------|------------------------------------------------------------------------------------------|
| neutrophil degranulation (GO:0043312)                                                    | 0.023 | 1.000 | <i>ADGRG3; NRAS; PTPRC; DGAT1; ANXA3; DLC1; NAPRT; RAB18; SIRPA; YPEL5; MAPK14; CAMP</i> |
| neutrophil activation involved in immune response (GO:0002283)                           | 0.025 | 1.000 | <i>ADGRG3; NRAS; PTPRC; DGAT1; ANXA3; DLC1; NAPRT; RAB18; SIRPA; YPEL5; MAPK14; CAMP</i> |
| regulation of heterotypic cell-cell adhesion (GO:0034114)                                | 0.025 | 1.000 | <i>IL1RN; MYADM</i>                                                                      |
| osteoclast differentiation (GO:0030316)                                                  | 0.025 | 1.000 | <i>CSF1R; MAPK14</i>                                                                     |
| neutrophil mediated immunity (GO:0002446)                                                | 0.026 | 1.000 | <i>ADGRG3; NRAS; PTPRC; DGAT1; ANXA3; DLC1; NAPRT; RAB18; SIRPA; YPEL5; MAPK14; CAMP</i> |
| proteoglycan metabolic process (GO:0006029)                                              | 0.027 | 1.000 | <i>CSGALNACT1; GAL3ST4</i>                                                               |
| inositol phosphate-mediated signaling (GO:0048016)                                       | 0.027 | 1.000 | <i>EDN2; NFATC1</i>                                                                      |
| positive regulation of lipid metabolic process (GO:0045834)                              | 0.030 | 1.000 | <i>EEF1A2; CREBL2</i>                                                                    |
| negative regulation of G-protein coupled receptor protein signaling pathway (GO:0045744) | 0.030 | 1.000 | <i>CRY1; KLK14</i>                                                                       |
| negative regulation of protein polymerization (GO:0032272)                               | 0.033 | 1.000 | <i>KANK1; MYADM</i>                                                                      |
| positive regulation of biosynthetic process (GO:0009891)                                 | 0.033 | 1.000 | <i>GPRIN1; CREBL2</i>                                                                    |
| negative regulation of actin filament polymerization (GO:0030837)                        | 0.033 | 1.000 | <i>KANK1; MYADM</i>                                                                      |
| positive regulation of transferase activity (GO:0051347)                                 | 0.033 | 1.000 | <i>EPHB6; CSF1R; POT1; EPHB1; FGFR1</i>                                                  |
| phosphatidylinositol-mediated signaling (GO:0048015)                                     | 0.036 | 1.000 | <i>CSF1R; PIK3CB; FGFR1</i>                                                              |
| positive regulation of neutrophil chemotaxis (GO:0090023)                                | 0.039 | 1.000 | <i>CAMK1D; THBS4</i>                                                                     |
| negative regulation of cytoskeleton organization (GO:0051494)                            | 0.039 | 1.000 | <i>KANK1; MYADM</i>                                                                      |
| DNA geometric change (GO:0032392)                                                        | 0.039 | 1.000 | <i>ZRANB3; POT1</i>                                                                      |

|                                                                                   |       |       |                                         |
|-----------------------------------------------------------------------------------|-------|-------|-----------------------------------------|
| proteoglycan biosynthetic process (GO:0030166)                                    | 0.039 | 1.000 | <i>CSGALNACT1; GAL3ST4</i>              |
| cellular senescence (GO:0090398)                                                  | 0.039 | 1.000 | <i>MAPK14; TBX3</i>                     |
| glycosaminoglycan biosynthetic process (GO:0006024)                               | 0.040 | 1.000 | <i>CSGALNACT1; B4GAT1; LUM; B4GALT6</i> |
| positive regulation of neutrophil migration (GO:1902624)                          | 0.042 | 1.000 | <i>CAMK1D; THBS4</i>                    |
| prostaglandin metabolic process (GO:0006693)                                      | 0.042 | 1.000 | <i>EDN2; CYP4F8</i>                     |
| regulation of kinase activity (GO:0043549)                                        | 0.043 | 1.000 | <i>EPHB6; CSF1R; EPHB1; FGFR1</i>       |
| phosphatidylethanolamine acyl-chain remodeling (GO:0036152)                       | 0.045 | 1.000 | <i>PLA2G4F; PLA2G4C</i>                 |
| positive regulation of granulocyte chemotaxis (GO:0071624)                        | 0.045 | 1.000 | <i>CAMK1D; THBS4</i>                    |
| negative regulation of telomere maintenance via telomere lengthening (GO:1904357) | 0.045 | 1.000 | <i>ERCC4; POT1</i>                      |
| peptide metabolic process (GO:0006518)                                            | 0.047 | 1.000 | <i>PCSK1; PROS1; EEF1E1; CPN1</i>       |
| phosphatidylcholine acyl-chain remodeling (GO:0036151)                            | 0.048 | 1.000 | <i>PLA2G4F; PLA2G4C</i>                 |
| peptidyl-glutamic acid modification (GO:0018200)                                  | 0.048 | 1.000 | <i>NAA10; PROS1</i>                     |
| transcription from RNA polymerase III promoter (GO:0006383)                       | 0.048 | 1.000 | <i>TBP; SNAPC1</i>                      |
| regulation of protein localization to cell surface (GO:2000008)                   | 0.048 | 1.000 | <i>LEPROT; RAB11FIP5</i>                |
| oligosaccharide metabolic process (GO:0009311)                                    | 0.049 | 1.000 | <i>GALNT3; B3GALT2; GAL3ST4</i>         |

---

A total of 105 upregulated and 155 downregulated genes have been analyzed

**Table S10.** Differentially expressed genes between Mieap-positive and Mieap-negative cells located in torpedo-like structures ( $p < 0.05$ )

| Genes           | P-value | LogFC  |
|-----------------|---------|--------|
| <i>FOSB</i>     | 0.000   | -8.642 |
| <i>CCDC18</i>   | 0.001   | 4.732  |
| <i>GPR153</i>   | 0.001   | -7.251 |
| <i>ZNF337</i>   | 0.001   | -7.229 |
| <i>MYH4</i>     | 0.001   | -8.198 |
| <i>IER5</i>     | 0.001   | -4.042 |
| <i>MTG1</i>     | 0.001   | -6.903 |
| <i>SAMD9</i>    | 0.001   | 7.136  |
| <i>OLFML2B</i>  | 0.001   | -7.023 |
| <i>KDR</i>      | 0.002   | -7.390 |
| <i>COL4A1</i>   | 0.002   | -4.392 |
| <i>MYH3</i>     | 0.002   | -5.666 |
| <i>SLIT2</i>    | 0.002   | -6.863 |
| <i>RRAS2</i>    | 0.002   | 6.386  |
| <i>FOPNL</i>    | 0.002   | 5.779  |
| <i>DGKI</i>     | 0.002   | -7.395 |
| <i>MED10</i>    | 0.002   | -6.759 |
| <i>TACC1</i>    | 0.002   | -3.804 |
| <i>KLHL7</i>    | 0.002   | 5.690  |
| <i>KDM4C</i>    | 0.003   | 4.068  |
| <i>LIAS</i>     | 0.003   | 6.305  |
| <i>B4GALT6</i>  | 0.003   | -7.148 |
| <i>MFSD8</i>    | 0.003   | 6.289  |
| <i>NOTCH4</i>   | 0.003   | -7.197 |
| <i>BIN2</i>     | 0.003   | -7.121 |
| <i>TCF4</i>     | 0.003   | -6.239 |
| <i>PRPF18</i>   | 0.004   | 6.746  |
| <i>ACTG2</i>    | 0.004   | -7.096 |
| <i>RASD1</i>    | 0.004   | -5.307 |
| <i>DHFR2</i>    | 0.004   | 5.975  |
| <i>TOE1</i>     | 0.004   | 6.024  |
| <i>FAM110B</i>  | 0.005   | -6.496 |
| <i>RMI2</i>     | 0.005   | 6.043  |
| <i>LTB4R2</i>   | 0.005   | -6.939 |
| <i>RSAD1</i>    | 0.005   | 6.041  |
| <i>MXRA7</i>    | 0.005   | -6.586 |
| <i>STK32B</i>   | 0.005   | -6.910 |
| <i>LACTB2</i>   | 0.005   | 6.003  |
| <i>CAPN9</i>    | 0.006   | -6.896 |
| <i>NPR2</i>     | 0.006   | -6.273 |
| <i>MBIP</i>     | 0.006   | 6.541  |
| <i>C17orf58</i> | 0.006   | 6.491  |
| <i>CDO1</i>     | 0.006   | -6.833 |
| <i>SLC2A13</i>  | 0.007   | 6.359  |
| <i>BICDL1</i>   | 0.007   | 5.241  |
| <i>MMP11</i>    | 0.007   | -6.834 |
| <i>KIF26B</i>   | 0.007   | -4.854 |

|                   |       |        |
|-------------------|-------|--------|
| <i>ADAMTS6</i>    | 0.007 | -6.756 |
| <i>CENPL</i>      | 0.008 | 5.946  |
| <i>THY1</i>       | 0.008 | -6.283 |
| <i>APEX2</i>      | 0.008 | 5.242  |
| <i>PLEK2</i>      | 0.008 | -6.383 |
| <i>SYNPO2</i>     | 0.008 | -6.323 |
| <i>DUSP22</i>     | 0.009 | -5.930 |
| <i>SLC26A8</i>    | 0.009 | -6.691 |
| <i>TEKT2</i>      | 0.010 | -6.663 |
| <i>H3C7</i>       | 0.010 | 5.700  |
| <i>ACTA1</i>      | 0.010 | -5.537 |
| <i>SUSD4</i>      | 0.010 | -6.651 |
| <i>PDCD1LG2</i>   | 0.010 | -6.053 |
| <i>MRVII</i>      | 0.011 | -6.120 |
| <i>ISOC1</i>      | 0.011 | 3.816  |
| <i>ZNF17</i>      | 0.011 | 5.715  |
| <i>RNF181</i>     | 0.011 | 5.035  |
| <i>ZNF423</i>     | 0.012 | -5.243 |
| <i>FSCN2</i>      | 0.012 | -6.534 |
| <i>KXD1</i>       | 0.013 | 4.521  |
| <i>SYT11</i>      | 0.013 | -6.548 |
| <i>ZNF470</i>     | 0.013 | -5.880 |
| <i>BCYRN1</i>     | 0.014 | 4.066  |
| <i>BOC</i>        | 0.014 | -5.814 |
| <i>VAV1</i>       | 0.014 | -6.492 |
| <i>H2BC11</i>     | 0.014 | 5.046  |
| <i>SCAMP5</i>     | 0.015 | 6.045  |
| <i>PHF11</i>      | 0.016 | 3.318  |
| <i>SLC10A5</i>    | 0.016 | -6.449 |
| <i>MIAP</i>       | 0.016 | -6.523 |
| <i>C19orf18</i>   | 0.016 | 5.950  |
| <i>H1-6</i>       | 0.017 | -5.919 |
| <i>MED7</i>       | 0.017 | 5.438  |
| <i>PKNOX1</i>     | 0.017 | -4.008 |
| <i>SDAD1P1</i>    | 0.017 | 5.940  |
| <i>GLI2</i>       | 0.017 | -6.544 |
| <i>WRAP73</i>     | 0.018 | 5.444  |
| <i>ZNF624</i>     | 0.018 | -3.533 |
| <i>ATP8A2</i>     | 0.018 | -6.378 |
| <i>ZEB2</i>       | 0.018 | -3.619 |
| <i>PALB2</i>      | 0.019 | 2.613  |
| <i>PGAM5</i>      | 0.019 | 5.881  |
| <i>MRPL23</i>     | 0.019 | 5.500  |
| <i>LOC441666</i>  | 0.020 | -5.324 |
| <i>CSGALNACT1</i> | 0.020 | 3.520  |
| <i>RPH3A</i>      | 0.021 | -6.315 |
| <i>PCGF1</i>      | 0.021 | 5.384  |
| <i>DOK4</i>       | 0.021 | -6.280 |
| <i>P3H3</i>       | 0.022 | -6.288 |
| <i>CSTF1</i>      | 0.022 | 2.818  |

|                  |       |        |
|------------------|-------|--------|
| <i>C9orf43</i>   | 0.022 | -4.995 |
| <i>LINC00536</i> | 0.022 | 5.554  |
| <i>CTSC</i>      | 0.023 | -4.773 |
| <i>DBP</i>       | 0.023 | 5.847  |
| <i>USP49</i>     | 0.023 | 4.744  |
| <i>SPARCL1</i>   | 0.023 | -3.782 |
| <i>C3</i>        | 0.023 | -3.234 |
| <i>EIF6</i>      | 0.023 | 4.055  |
| <i>ACTR10</i>    | 0.024 | 2.868  |
| <i>CCDC192</i>   | 0.024 | -6.232 |
| <i>SPAG6</i>     | 0.024 | -5.620 |
| <i>NCSI</i>      | 0.024 | -4.655 |
| <i>ZSWIM5</i>    | 0.025 | 5.783  |
| <i>SCN3A</i>     | 0.025 | -6.288 |
| <i>HTRA1</i>     | 0.025 | -4.905 |
| <i>MRPL22</i>    | 0.026 | -6.204 |
| <i>A2M</i>       | 0.026 | -3.680 |
| <i>IL15RA</i>    | 0.026 | -6.258 |
| <i>IFIT1</i>     | 0.026 | 4.646  |
| <i>PIP4K2A</i>   | 0.026 | -3.162 |
| <i>LSM5</i>      | 0.026 | 2.546  |
| <i>ZNF256</i>    | 0.026 | 5.286  |
| <i>SUFU</i>      | 0.027 | -2.885 |
| <i>CRLF3</i>     | 0.027 | -3.588 |
| <i>SLC7A6</i>    | 0.027 | 5.255  |
| <i>FBXL6</i>     | 0.027 | 4.603  |
| <i>ZNF837</i>    | 0.027 | 5.248  |
| <i>TMEM75</i>    | 0.027 | 4.870  |
| <i>DPM1</i>      | 0.028 | 3.254  |
| <i>PRKAB1</i>    | 0.028 | 4.163  |
| <i>EIF4A1</i>    | 0.028 | -4.955 |
| <i>RTCB</i>      | 0.028 | 3.101  |
| <i>STPG3-AS1</i> | 0.029 | -6.143 |
| <i>SGO1-AS1</i>  | 0.029 | 5.304  |
| <i>NEURL1B</i>   | 0.029 | 5.706  |
| <i>CPXM2</i>     | 0.029 | -6.129 |
| <i>ADCY10</i>    | 0.029 | -5.768 |
| <i>DNAJC4</i>    | 0.029 | 4.135  |
| <i>WNT4</i>      | 0.029 | 5.319  |
| <i>MPZL3</i>     | 0.030 | 3.347  |
| <i>ZNF573</i>    | 0.030 | 3.455  |
| <i>C11orf1</i>   | 0.030 | 5.331  |
| <i>MAG11-AS1</i> | 0.031 | 5.248  |
| <i>FNDC1</i>     | 0.031 | -3.688 |
| <i>MRPS15</i>    | 0.031 | 2.897  |
| <i>TRAF3IP3</i>  | 0.031 | -4.871 |
| <i>POMK</i>      | 0.032 | -3.259 |
| <i>AXDND1</i>    | 0.032 | 5.638  |
| <i>MAP2K6</i>    | 0.032 | -2.863 |
| <i>BMPRIA</i>    | 0.032 | 3.064  |

|                     |       |        |
|---------------------|-------|--------|
| <i>RNF225</i>       | 0.033 | 5.685  |
| <i>GNRHR</i>        | 0.033 | 5.618  |
| <i>TCEANC</i>       | 0.033 | 5.218  |
| <i>CPVL</i>         | 0.033 | -5.128 |
| <i>TRIM59</i>       | 0.033 | 5.201  |
| <i>HSPA13</i>       | 0.033 | 5.184  |
| <i>SLC39A14</i>     | 0.033 | -3.540 |
| <i>MMD</i>          | 0.033 | -6.072 |
| <i>FH</i>           | 0.034 | 3.467  |
| <i>MOCS3</i>        | 0.034 | 3.806  |
| <i>STK16</i>        | 0.035 | -4.559 |
| <i>CD248</i>        | 0.035 | -6.029 |
| <i>CDK8</i>         | 0.035 | 3.180  |
| <i>PDE12</i>        | 0.035 | -2.416 |
| <i>KBTBD8</i>       | 0.035 | -6.059 |
| <i>ZMYM4-AS1</i>    | 0.035 | -6.022 |
| <i>URM1</i>         | 0.036 | 4.547  |
| <i>RBP5</i>         | 0.037 | -5.315 |
| <i>MPZL2</i>        | 0.037 | -3.372 |
| <i>JMJD4</i>        | 0.037 | -4.479 |
| <i>CTDNEP1</i>      | 0.038 | 2.824  |
| <i>CX3CL1</i>       | 0.038 | -3.549 |
| <i>NMD3</i>         | 0.038 | -2.116 |
| <i>DIPK1B</i>       | 0.038 | -5.972 |
| <i>FLJ37453</i>     | 0.038 | -5.985 |
| <i>CPAMD8</i>       | 0.038 | -2.362 |
| <i>CDKN2AIPNL</i>   | 0.038 | 5.207  |
| <i>EDDM13</i>       | 0.038 | 4.080  |
| <i>ZNF763</i>       | 0.038 | 5.095  |
| <i>IER2</i>         | 0.039 | -3.345 |
| <i>C8orf58</i>      | 0.039 | 4.436  |
| <i>KRT81</i>        | 0.039 | -5.969 |
| <i>TAP1</i>         | 0.039 | 5.467  |
| <i>SPI1</i>         | 0.040 | -5.940 |
| <i>TMEM44</i>       | 0.040 | -5.253 |
| <i>MALRD1</i>       | 0.041 | 5.496  |
| <i>ILK</i>          | 0.041 | -5.576 |
| <i>PKD2</i>         | 0.041 | -4.585 |
| <i>DENND4B</i>      | 0.041 | -2.554 |
| <i>HABP4</i>        | 0.041 | -6.034 |
| <i>LOC102724788</i> | 0.042 | 5.494  |
| <i>USP18</i>        | 0.042 | 4.959  |
| <i>NOC4L</i>        | 0.042 | -3.707 |
| <i>ZNF284</i>       | 0.042 | -5.239 |
| <i>COX10</i>        | 0.043 | 5.417  |
| <i>ZNF200</i>       | 0.043 | 3.615  |
| <i>EXOSC2</i>       | 0.043 | 3.617  |
| <i>MX2</i>          | 0.044 | 3.849  |
| <i>ETS1</i>         | 0.044 | -4.910 |
| <i>SLC29A4</i>      | 0.044 | 5.070  |

|                     |       |        |
|---------------------|-------|--------|
| <i>RPL39</i>        | 0.044 | -3.729 |
| <i>RBAK</i>         | 0.044 | 2.460  |
| <i>PRC1-AS1</i>     | 0.045 | 5.022  |
| <i>TMEM70</i>       | 0.045 | -4.425 |
| <i>HEIH</i>         | 0.045 | -5.893 |
| <i>CARD9</i>        | 0.045 | 3.534  |
| <i>LINC01811</i>    | 0.045 | -5.877 |
| <i>HMCN1</i>        | 0.046 | -4.058 |
| <i>MAP3K21</i>      | 0.046 | 5.433  |
| <i>ZC2HC1C</i>      | 0.046 | 5.017  |
| <i>ST7</i>          | 0.047 | -3.950 |
| <i>COA3</i>         | 0.047 | 5.019  |
| <i>NINJ2-AS1</i>    | 0.047 | 5.057  |
| <i>ADAMTS16</i>     | 0.048 | -5.848 |
| <i>CAVIN3</i>       | 0.048 | -5.855 |
| <i>PROSER1</i>      | 0.048 | 2.218  |
| <i>TMEM69</i>       | 0.048 | 4.343  |
| <i>EOGT</i>         | 0.049 | -4.266 |
| <i>CCDC122</i>      | 0.049 | 3.098  |
| <i>COL4A2</i>       | 0.049 | -3.012 |
| <i>BNIP3</i>        | 0.049 | 2.278  |
| <i>KIAA1671-AS1</i> | 0.049 | -4.611 |
| <i>ZNF517</i>       | 0.049 | 5.382  |
| <i>BCL7B</i>        | 0.049 | 2.836  |
| <i>TFPI2</i>        | 0.049 | 3.871  |
| <i>H2AC16</i>       | 0.049 | 5.319  |
| <i>BTN2A3P</i>      | 0.049 | 5.401  |
| <i>TIGD7</i>        | 0.049 | 5.320  |
| <i>SYT14</i>        | 0.049 | -5.841 |

---

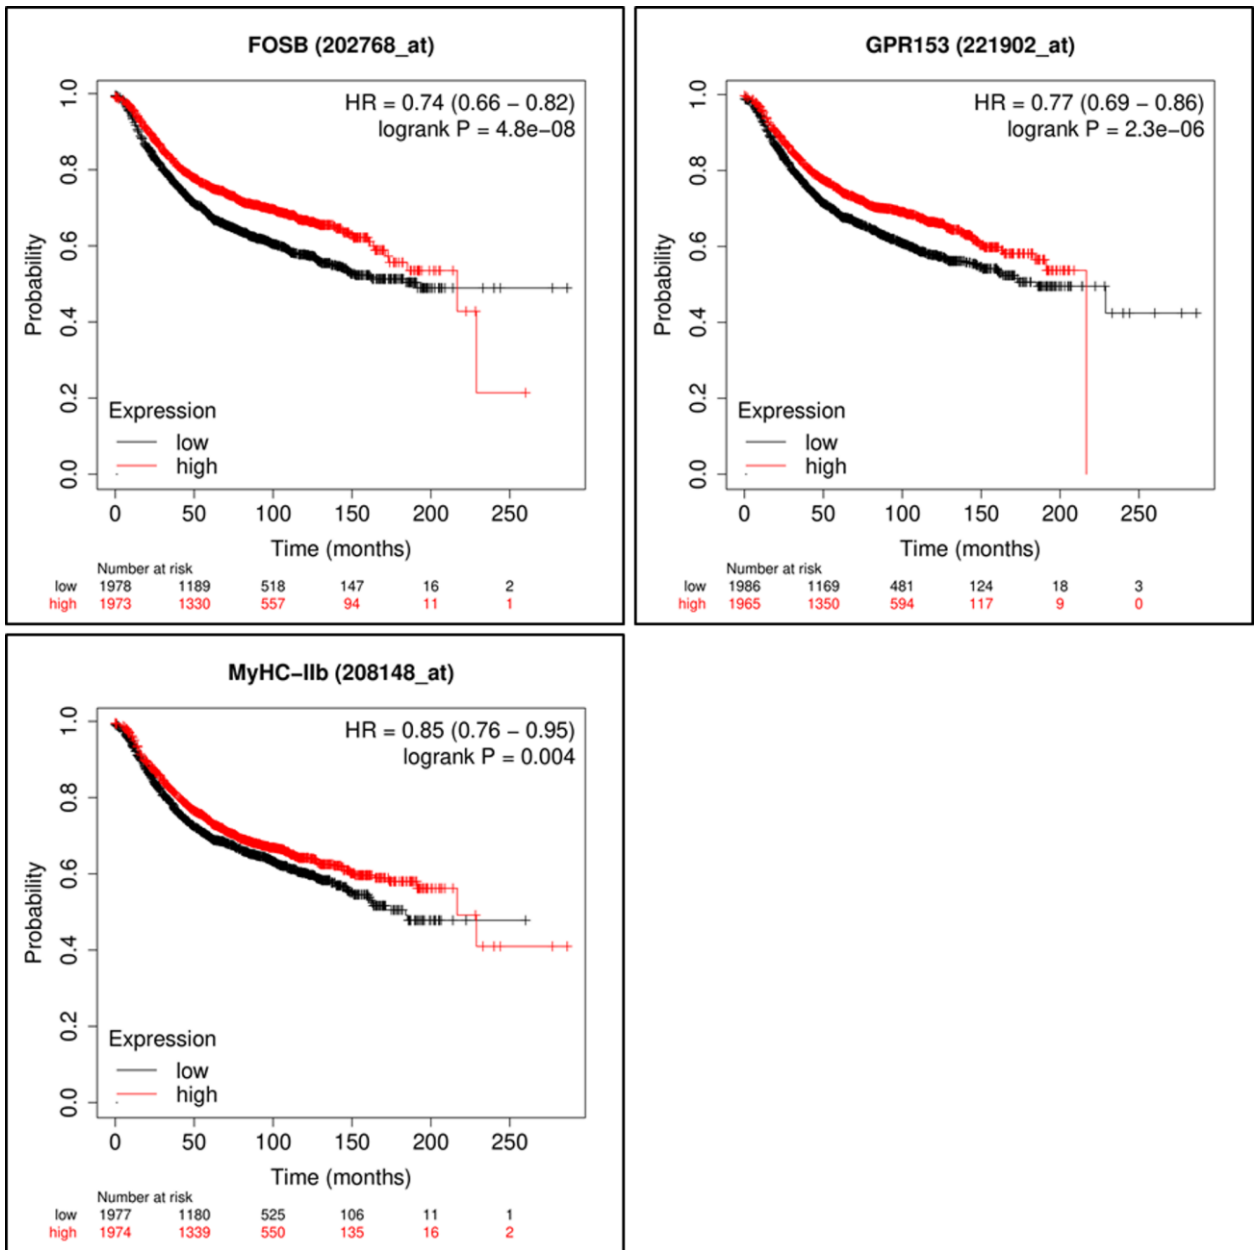

**Figure S6.** Association of DEGs (*FOSB*, *GPR153* and *MYH4*) in Micap-positive cells with relapse-free survival of breast cancer patients according to Kaplan-Meier Plotter database.



**Table S11.** KEGG enrichment analysis of up- and down-regulated genes in Mieap-positive cells located in torpedo-like structures ( $p < 0.05$ )

| Term                             | P-value | Adjusted P-value | Genes                                                                                               |
|----------------------------------|---------|------------------|-----------------------------------------------------------------------------------------------------|
| Sulfur relay system              | 0.003   | 1.000            | <i>MOCS3; URM1</i>                                                                                  |
| Herpes simplex virus 1 infection | 0.004   | 0.629            | <i>ZNF17; ZNF284; ZNF470; CARD9; TAP1; C3; ZNF517; ZNF624; ZNF337; RBAK; ZNF763; ZNF256; ZNF200</i> |
| Hedgehog signaling pathway       | 0.016   | 1.000            | <i>SUFU; BOC; GLI2</i>                                                                              |
| Basal cell carcinoma             | 0.034   | 1.000            | <i>SUFU; GLI2; WNT4</i>                                                                             |
| Mitophagy                        | 0.037   | 1.000            | <i>BNIP3; RRAS2; PGAM5</i>                                                                          |

A total of 106 upregulated and 120 downregulated genes have been analyzed

**Table S12.** GO enrichment analysis of up- and down-regulated genes in Mieap-positive cells located in torpedo-like structures ( $p < 0.05$ )

| Term                                                                                   | P-value | Adjusted P-value | Genes                                    |
|----------------------------------------------------------------------------------------|---------|------------------|------------------------------------------|
| branching morphogenesis of an epithelial tube (GO:0048754)                             | 0.000   | 0.610            | <i>COL4A1; NOTCH4; SLIT2; PKD2; GLI2</i> |
| epithelial tube morphogenesis (GO:0060562)                                             | 0.001   | 1.000            | <i>COL4A1; SLIT2; PKD2; GLI2</i>         |
| heterocycle biosynthetic process (GO:0018130)                                          | 0.001   | 1.000            | <i>MOCS3; MBIP; LIAS</i>                 |
| mammary gland development (GO:0030879)                                                 | 0.002   | 1.000            | <i>NOTCH4; GLI2; WNT4</i>                |
| pri-miRNA transcription from RNA polymerase II promoter (GO:0061614)                   | 0.003   | 1.000            | <i>SPI1; ETS1</i>                        |
| molybdopterin cofactor biosynthetic process (GO:0032324)                               | 0.003   | 1.000            | <i>MOCS3; MBIP</i>                       |
| molybdopterin cofactor metabolic process (GO:0043545)                                  | 0.003   | 1.000            | <i>MOCS3; MBIP</i>                       |
| regulation of calcium ion-dependent exocytosis (GO:0017158)                            | 0.003   | 1.000            | <i>SCAMP5; RPH3A; SYT11; SYT14</i>       |
| RNA phosphodiester bond hydrolysis (GO:0090501)                                        | 0.004   | 1.000            | <i>TOE1; LACTB2; PDE12</i>               |
| vesicle fusion (GO:0006906)                                                            | 0.004   | 1.000            | <i>RPH3A; SAMD9; SYT11; TAP1; SYT14</i>  |
| tRNA wobble uridine modification (GO:0002098)                                          | 0.004   | 1.000            | <i>MOCS3; URM1</i>                       |
| tRNA wobble base modification (GO:0002097)                                             | 0.005   | 1.000            | <i>MOCS3; URM1</i>                       |
| central nervous system projection neuron axonogenesis (GO:0021952)                     | 0.005   | 1.000            | <i>SLIT2; GLI2</i>                       |
| nuclear-transcribed mRNA catabolic process, deadenylation-dependent decay (GO:0000288) | 0.006   | 1.000            | <i>EIF4A1; PDE12; LSM5; EXOSC2</i>       |
| metanephric mesenchyme development (GO:0072075)                                        | 0.007   | 1.000            | <i>PKD2; WNT4</i>                        |
| spinal cord development (GO:0021510)                                                   | 0.007   | 1.000            | <i>PKD2; GLI2</i>                        |
| ribosomal subunit export from nucleus (GO:0000054)                                     | 0.008   | 1.000            | <i>EIF6; NMD3</i>                        |
| regulation of regulated secretory pathway (GO:1903305)                                 | 0.008   | 1.000            | <i>RPH3A; SYT11; SYT14</i>               |
| organic cyclic compound biosynthetic process (GO:1901362)                              | 0.008   | 1.000            | <i>MOCS3; MBIP; LIAS</i>                 |

|                                                                    |       |       |                                                           |
|--------------------------------------------------------------------|-------|-------|-----------------------------------------------------------|
| actin-myosin filament sliding (GO:0033275)                         | 0.009 | 1.000 | <i>ACTA1; MYH3; MYH4</i>                                  |
| muscle filament sliding (GO:0030049)                               | 0.009 | 1.000 | <i>ACTA1; MYH3; MYH4</i>                                  |
| regulation of triglyceride biosynthetic process (GO:0010866)       | 0.009 | 1.000 | <i>C3; CTDNEP1</i>                                        |
| positive regulation of cellular biosynthetic process (GO:0031328)  | 0.010 | 1.000 | <i>CTDNEP1; ZEB2; EIF6; NMD3; PKD2; GLI2</i>              |
| gland development (GO:0048732)                                     | 0.010 | 1.000 | <i>NOTCH4; PKD2; GLI2; WNT4</i>                           |
| branching involved in blood vessel morphogenesis (GO:0001569)      | 0.011 | 1.000 | <i>COL4A1; NOTCH4</i>                                     |
| negative regulation of smooth muscle cell migration (GO:0014912)   | 0.011 | 1.000 | <i>SLIT2; BMPRIA</i>                                      |
| positive regulation of mitochondrial fission (GO:0090141)          | 0.011 | 1.000 | <i>BNIP3; KDR</i>                                         |
| cell migration involved in sprouting angiogenesis (GO:0002042)     | 0.011 | 1.000 | <i>KDR; SLIT2</i>                                         |
| regulation of mitochondrial translation (GO:0070129)               | 0.012 | 1.000 | <i>COA3; MTG1</i>                                         |
| cytoplasmic sequestering of protein (GO:0051220)                   | 0.012 | 1.000 | <i>SUFU; PKD2</i>                                         |
| positive regulation of macroautophagy (GO:0016239)                 | 0.013 | 1.000 | <i>BNIP3; KDR; PIP4K2A</i>                                |
| cellular response to dsRNA (GO:0071359)                            | 0.014 | 1.000 | <i>PDE12; IFIT1</i>                                       |
| cytoplasmic sequestering of transcription factor (GO:0042994)      | 0.014 | 1.000 | <i>SUFU; PKD2</i>                                         |
| positive regulation of focal adhesion assembly (GO:0051894)        | 0.015 | 1.000 | <i>KDR; THY1</i>                                          |
| response to interferon-alpha (GO:0035455)                          | 0.015 | 1.000 | <i>PDE12; MX2</i>                                         |
| ureteric bud development (GO:0001657)                              | 0.015 | 1.000 | <i>SLIT2; PKD2</i>                                        |
| mesonephric tubule development (GO:0072164)                        | 0.015 | 1.000 | <i>SLIT2; PKD2</i>                                        |
| extracellular matrix organization (GO:0030198)                     | 0.016 | 1.000 | <i>CSGALNACT1; MMP11; COL4A2; COL4A1; KDR; HTRA1; A2M</i> |
| blood vessel endothelial cell migration (GO:0043534)               | 0.017 | 1.000 | <i>KDR; SLIT2</i>                                         |
| regulation of smooth muscle cell migration (GO:0014910)            | 0.017 | 1.000 | <i>SLIT2; BMPRIA</i>                                      |
| positive regulation of adherens junction organization (GO:1903393) | 0.019 | 1.000 | <i>KDR; THY1</i>                                          |

|                                                                              |       |       |                                        |
|------------------------------------------------------------------------------|-------|-------|----------------------------------------|
| regulation of mitochondrial fission (GO:0090140)                             | 0.019 | 1.000 | <i>BNIP3; KDR</i>                      |
| inactivation of MAPK activity (GO:0000188)                                   | 0.021 | 1.000 | <i>DUSP22; MBIP</i>                    |
| positive regulation of macromolecule biosynthetic process (GO:0010557)       | 0.023 | 1.000 | <i>EIF6; KDR; NMD3; WNT4; GLI2</i>     |
| GTP metabolic process (GO:0046039)                                           | 0.023 | 1.000 | <i>MOCS3; MBIP</i>                     |
| positive regulation of leukocyte cell-cell adhesion (GO:1903039)             | 0.023 | 1.000 | <i>THY1; ETS1</i>                      |
| hepaticobiliary system development (GO:0061008)                              | 0.023 | 1.000 | <i>PKD2; WNT4</i>                      |
| regulation of axonogenesis (GO:0050770)                                      | 0.024 | 1.000 | <i>THY1; SLIT2; ZSWIM5</i>             |
| cellular response to transforming growth factor beta stimulus (GO:0071560)   | 0.027 | 1.000 | <i>DUSP22; STK16; WNT4; BMPRIA</i>     |
| negative regulation of transcription factor import into nucleus (GO:0042992) | 0.028 | 1.000 | <i>SUFU; PKD2</i>                      |
| positive regulation of cell junction assembly (GO:1901890)                   | 0.028 | 1.000 | <i>KDR; THY1</i>                       |
| respiratory chain complex IV assembly (GO:0008535)                           | 0.032 | 1.000 | <i>COA3; COX10</i>                     |
| cellular protein catabolic process (GO:0044257)                              | 0.033 | 1.000 | <i>BNIP3; CPVL; CTSC</i>               |
| strand displacement (GO:0000732)                                             | 0.035 | 1.000 | <i>RMI2; PALB2</i>                     |
| endocrine system development (GO:0035270)                                    | 0.035 | 1.000 | <i>GLI2; WNT4</i>                      |
| snRNA 3'-end processing (GO:0034472)                                         | 0.035 | 1.000 | <i>TOE1; EXOSC2</i>                    |
| transcription initiation from RNA polymerase II promoter (GO:0006367)        | 0.035 | 1.000 | <i>CDK8; NOTCH4; MED10; TCF4; MED7</i> |
| regulation of lipid biosynthetic process (GO:0046890)                        | 0.040 | 1.000 | <i>C3; EIF6</i>                        |
| coenzyme biosynthetic process (GO:0009108)                                   | 0.042 | 1.000 | <i>MOCS3; LIAS</i>                     |
| regulation of cellular biosynthetic process (GO:0031326)                     | 0.042 | 1.000 | <i>C3; EIF6</i>                        |
| regulation of endothelial cell migration (GO:0010594)                        | 0.043 | 1.000 | <i>KDR; SLIT2; ETS1</i>                |
| regulation of osteoblast differentiation (GO:0045667)                        | 0.043 | 1.000 | <i>SUFU; WNT4; BMPRIA</i>              |
| artery morphogenesis (GO:0048844)                                            | 0.045 | 1.000 | <i>PKD2; BMPRIA</i>                    |
| cyclic purine nucleotide metabolic process (GO:0052652)                      | 0.045 | 1.000 | <i>ADCY10; NPR2</i>                    |

|                                                                                     |       |       |                                       |
|-------------------------------------------------------------------------------------|-------|-------|---------------------------------------|
| organelle membrane fusion (GO:0090174)                                              | 0.046 | 1.000 | <i>RPH3A; SYT11; SYT14</i>            |
|                                                                                     |       |       | <i>ZNF17; ZNF573; EIF4A1; ZNF284;</i> |
|                                                                                     |       |       | <i>ZNF470; PRKAB1; ETS1; ACTG2;</i>   |
| regulation of gene expression (GO:0010468)                                          | 0.047 | 1.000 | <i>ACTA1; ZNF837; SUFU; KDR;</i>      |
|                                                                                     |       |       | <i>PCGF1; ZNF624; RBAK; ZNF256;</i>   |
|                                                                                     |       |       | <i>ZNF200; WNT4</i>                   |
| positive regulation of release of sequestered calcium ion into cytosol (GO:0051281) | 0.048 | 1.000 | <i>THY1; PKD2</i>                     |
| liver development (GO:0001889)                                                      | 0.048 | 1.000 | <i>PKD2; WNT4</i>                     |
| positive regulation of bone mineralization (GO:0030501)                             | 0.048 | 1.000 | <i>WNT4; BMPRIA</i>                   |
| positive regulation of viral genome replication (GO:0045070)                        | 0.048 | 1.000 | <i>PDE12; IFIT1</i>                   |
| cofactor biosynthetic process (GO:0051188)                                          | 0.048 | 1.000 | <i>MOCS3; MBIP</i>                    |
| proteolysis (GO:0006508)                                                            | 0.048 | 1.000 | <i>CAPN9; CPXM2; SUFU; HTRA1;</i>     |
|                                                                                     |       |       | <i>CPVL; CTSC; FBXL6</i>              |
| negative regulation of cell migration (GO:0030336)                                  | 0.049 | 1.000 | <i>THY1; SLIT2; CX3CLI; BMPRIA</i>    |
| sulfur compound biosynthetic process (GO:0044272)                                   | 0.049 | 1.000 | <i>CSGALNACT1; LIAS; B4GALT6;</i>     |
|                                                                                     |       |       | <i>CDO1</i>                           |

---

A total of 106 upregulated and 120 downregulated genes have been analyzed

**Table S13.** Differentially expressed genes between EZR-negative and EZR-positive cells located in torpedo-like structures ( $p < 0.05$ )

| Gene              | P-value | LogFC  |
|-------------------|---------|--------|
| <i>CD109</i>      | 0.000   | 7.836  |
| <i>ID4</i>        | 0.000   | 7.848  |
| <i>CA5B</i>       | 0.000   | 7.536  |
| <i>GCNT7</i>      | 0.000   | 7.273  |
| <i>ST8SIA1</i>    | 0.000   | 5.093  |
| <i>NR4A1</i>      | 0.001   | 4.957  |
| <i>SYCP3</i>      | 0.001   | -5.976 |
| <i>MAP2</i>       | 0.001   | 6.998  |
| <i>LINC00539</i>  | 0.001   | 7.450  |
| <i>SLC5A4</i>     | 0.001   | 7.426  |
| <i>ZNF416</i>     | 0.001   | 7.004  |
| <i>CGRRF1</i>     | 0.001   | 5.424  |
| <i>ADAMTS6</i>    | 0.001   | 7.398  |
| <i>TMEM72-AS1</i> | 0.001   | 7.008  |
| <i>ZBTB42</i>     | 0.001   | 4.585  |
| <i>DCAF8L1</i>    | 0.001   | 7.244  |
| <i>FAM174C</i>    | 0.002   | -6.202 |
| <i>TECTA</i>      | 0.002   | 6.910  |
| <i>TCHH</i>       | 0.002   | 3.354  |
| <i>DKK2</i>       | 0.002   | 4.907  |
| <i>FCGR2B</i>     | 0.002   | 5.947  |
| <i>SHCBP1</i>     | 0.003   | 5.146  |
| <i>ERG</i>        | 0.003   | 6.681  |
| <i>EHHADH</i>     | 0.003   | -6.538 |
| <i>NR4A3</i>      | 0.003   | 6.266  |
| <i>SPTB</i>       | 0.004   | 6.095  |
| <i>SCNN1D</i>     | 0.004   | -5.931 |
| <i>FBXO44</i>     | 0.004   | 5.561  |
| <i>JAG1</i>       | 0.004   | 3.777  |
| <i>ZNF48</i>      | 0.005   | -5.777 |
| <i>MYH11</i>      | 0.005   | 4.037  |
| <i>ADAMTS10</i>   | 0.005   | 6.698  |
| <i>ALMS1P1</i>    | 0.005   | -5.905 |
| <i>MFSD13A</i>    | 0.006   | -5.718 |
| <i>SLC26A8</i>    | 0.006   | 5.865  |
| <i>EME1</i>       | 0.006   | 3.973  |
| <i>C12orf57</i>   | 0.006   | 6.438  |
| <i>ACOX2</i>      | 0.006   | 3.914  |
| <i>RAD51B</i>     | 0.006   | -3.888 |
| <i>P3H2</i>       | 0.006   | 6.412  |
| <i>SLC34A2</i>    | 0.007   | 5.464  |
| <i>PRELID1</i>    | 0.007   | -3.957 |
| <i>MIR4697HG</i>  | 0.007   | 5.486  |
| <i>SLFN1</i>      | 0.007   | 6.381  |
| <i>VCPKMT</i>     | 0.007   | 5.681  |
| <i>CARNS1</i>     | 0.007   | -5.299 |
| <i>RAD51D</i>     | 0.007   | -4.984 |

|                     |       |        |
|---------------------|-------|--------|
| <i>ITGA5</i>        | 0.008 | 3.486  |
| <i>IMP3</i>         | 0.008 | -5.644 |
| <i>GUCY1B1</i>      | 0.008 | 6.040  |
| <i>SYNC</i>         | 0.008 | 3.844  |
| <i>TLR2</i>         | 0.008 | 5.146  |
| <i>MUC3A</i>        | 0.009 | 4.191  |
| <i>CFAP61</i>       | 0.009 | -5.627 |
| <i>NUDT15</i>       | 0.009 | 4.080  |
| <i>LOC105371485</i> | 0.009 | -5.580 |
| <i>KCNN3</i>        | 0.009 | 4.484  |
| <i>NUP37</i>        | 0.010 | -6.027 |
| <i>UBL7-AS1</i>     | 0.011 | 6.257  |
| <i>FAM184A</i>      | 0.012 | -4.310 |
| <i>EIF4A1</i>       | 0.012 | -5.455 |
| <i>ADAM20</i>       | 0.012 | -5.073 |
| <i>STX18-AS1</i>    | 0.013 | 4.411  |
| <i>ITGA4</i>        | 0.013 | 4.204  |
| <i>LOC105374580</i> | 0.013 | 5.416  |
| <i>SLC19A1</i>      | 0.013 | -3.405 |
| <i>OVCH2</i>        | 0.014 | 6.113  |
| <i>LINC00847</i>    | 0.014 | -5.371 |
| <i>MRPS23</i>       | 0.014 | 2.894  |
| <i>RAPGEF3</i>      | 0.015 | -3.509 |
| <i>CHCHD5</i>       | 0.015 | -5.500 |
| <i>LRGUK</i>        | 0.015 | -4.259 |
| <i>NAV3</i>         | 0.016 | 3.105  |
| <i>AMN1</i>         | 0.016 | -5.358 |
| <i>FIGNL1</i>       | 0.019 | 3.754  |
| <i>FAM98B</i>       | 0.019 | 3.018  |
| <i>TRIM65</i>       | 0.020 | -4.667 |
| <i>DBF4B</i>        | 0.020 | 3.371  |
| <i>LINC01535</i>    | 0.020 | -4.520 |
| <i>FANCC</i>        | 0.020 | 2.817  |
| <i>SPARCL1</i>      | 0.020 | 3.049  |
| <i>ARL6IP6</i>      | 0.020 | -4.673 |
| <i>ASIC3</i>        | 0.020 | 4.473  |
| <i>CREB5</i>        | 0.021 | 5.930  |
| <i>ETNK2</i>        | 0.022 | -5.302 |
| <i>CD302</i>        | 0.022 | -5.304 |
| <i>TUBG1</i>        | 0.022 | 2.652  |
| <i>EGLN2</i>        | 0.023 | -2.727 |
| <i>CYCS</i>         | 0.023 | 3.001  |
| <i>MAD2L1</i>       | 0.024 | 4.139  |
| <i>PAXIP1-AS1</i>   | 0.024 | -4.606 |
| <i>ALG8</i>         | 0.024 | 2.422  |
| <i>LRRC75B</i>      | 0.025 | -5.165 |
| <i>NFS1</i>         | 0.025 | -3.365 |
| <i>ASB8</i>         | 0.027 | -4.029 |
| <i>TRMT44</i>       | 0.027 | -2.701 |
| <i>SLIT3</i>        | 0.028 | 3.826  |

|                     |       |        |
|---------------------|-------|--------|
| <i>TGFB111</i>      | 0.028 | 3.824  |
| <i>FAM3B</i>        | 0.028 | 4.786  |
| <i>DNAAF4</i>       | 0.028 | -5.141 |
| <i>BICD1</i>        | 0.028 | 3.248  |
| <i>ILDR2</i>        | 0.029 | 4.499  |
| <i>SNAPIN</i>       | 0.029 | 3.865  |
| <i>DNAJC9</i>       | 0.029 | -3.352 |
| <i>ANGPTL2</i>      | 0.030 | -4.200 |
| <i>ZNF79</i>        | 0.031 | -4.439 |
| <i>LOC101927787</i> | 0.032 | -4.530 |
| <i>RYR2</i>         | 0.032 | 3.510  |
| <i>ALKBH2</i>       | 0.032 | 3.463  |
| <i>CDK8</i>         | 0.032 | 2.825  |
| <i>CA5BP1</i>       | 0.033 | -4.149 |
| <i>NMNAT3</i>       | 0.033 | -4.367 |
| <i>PLCG2</i>        | 0.033 | 2.432  |
| <i>TTC31</i>        | 0.033 | 2.377  |
| <i>ZNF324</i>       | 0.034 | -3.089 |
| <i>MARK1</i>        | 0.034 | 4.325  |
| <i>SLC25A11</i>     | 0.035 | -3.017 |
| <i>ANO9</i>         | 0.035 | -3.112 |
| <i>MAGI2</i>        | 0.035 | 4.634  |
| <i>ZNF75D</i>       | 0.035 | -2.504 |
| <i>TRIM17</i>       | 0.036 | -4.980 |
| <i>TFCP2L1</i>      | 0.038 | 3.603  |
| <i>SYT8</i>         | 0.038 | -3.476 |
| <i>CYSTM1</i>       | 0.039 | 3.133  |
| <i>WDR75</i>        | 0.040 | 2.052  |
| <i>HCK</i>          | 0.041 | 3.710  |
| <i>AIF1</i>         | 0.042 | 4.875  |
| <i>TG</i>           | 0.042 | -2.689 |
| <i>LMF2</i>         | 0.042 | -3.196 |
| <i>TP73-AS1</i>     | 0.042 | -2.345 |
| <i>MIR9-3HG</i>     | 0.042 | -4.915 |
| <i>INTS7</i>        | 0.042 | -2.765 |
| <i>PTPRB</i>        | 0.042 | 3.566  |
| <i>GET4</i>         | 0.042 | -2.946 |
| <i>KCNK3</i>        | 0.042 | 4.386  |
| <i>TMEM220</i>      | 0.042 | 4.324  |
| <i>DOCK2</i>        | 0.042 | 2.552  |
| <i>AKAP12</i>       | 0.043 | 2.878  |
| <i>FAM221B</i>      | 0.043 | -4.488 |
| <i>VTCN1</i>        | 0.045 | 3.018  |
| <i>MORC3</i>        | 0.045 | 1.853  |
| <i>RGS1</i>         | 0.045 | 2.784  |
| <i>ALKBH4</i>       | 0.045 | 4.282  |
| <i>PINK1-AS</i>     | 0.045 | 3.708  |
| <i>WWTR1</i>        | 0.045 | 3.267  |
| <i>DNAH17</i>       | 0.046 | 3.619  |
| <i>ZHX2</i>         | 0.046 | 2.280  |



|                  |       |        |
|------------------|-------|--------|
| <i>IFI6</i>      | 0.046 | 2.704  |
| <i>GID4</i>      | 0.047 | -3.549 |
| <i>ZNF580</i>    | 0.047 | -3.036 |
| <i>COL7A1</i>    | 0.047 | -3.204 |
| <i>SLIT2</i>     | 0.047 | 3.219  |
| <i>HMCN2</i>     | 0.047 | 3.813  |
| <i>TOPORS</i>    | 0.048 | 2.009  |
| <i>ALG1</i>      | 0.048 | -3.476 |
| <i>FUT1</i>      | 0.048 | -4.827 |
| <i>PPP5D1</i>    | 0.048 | -4.171 |
| <i>ST20</i>      | 0.049 | -4.546 |
| <i>SLPI</i>      | 0.049 | -2.857 |
| <i>ZRSR2</i>     | 0.049 | 2.013  |
| <i>LRP3</i>      | 0.049 | -3.068 |
| <i>LINC00216</i> | 0.049 | 4.110  |

---

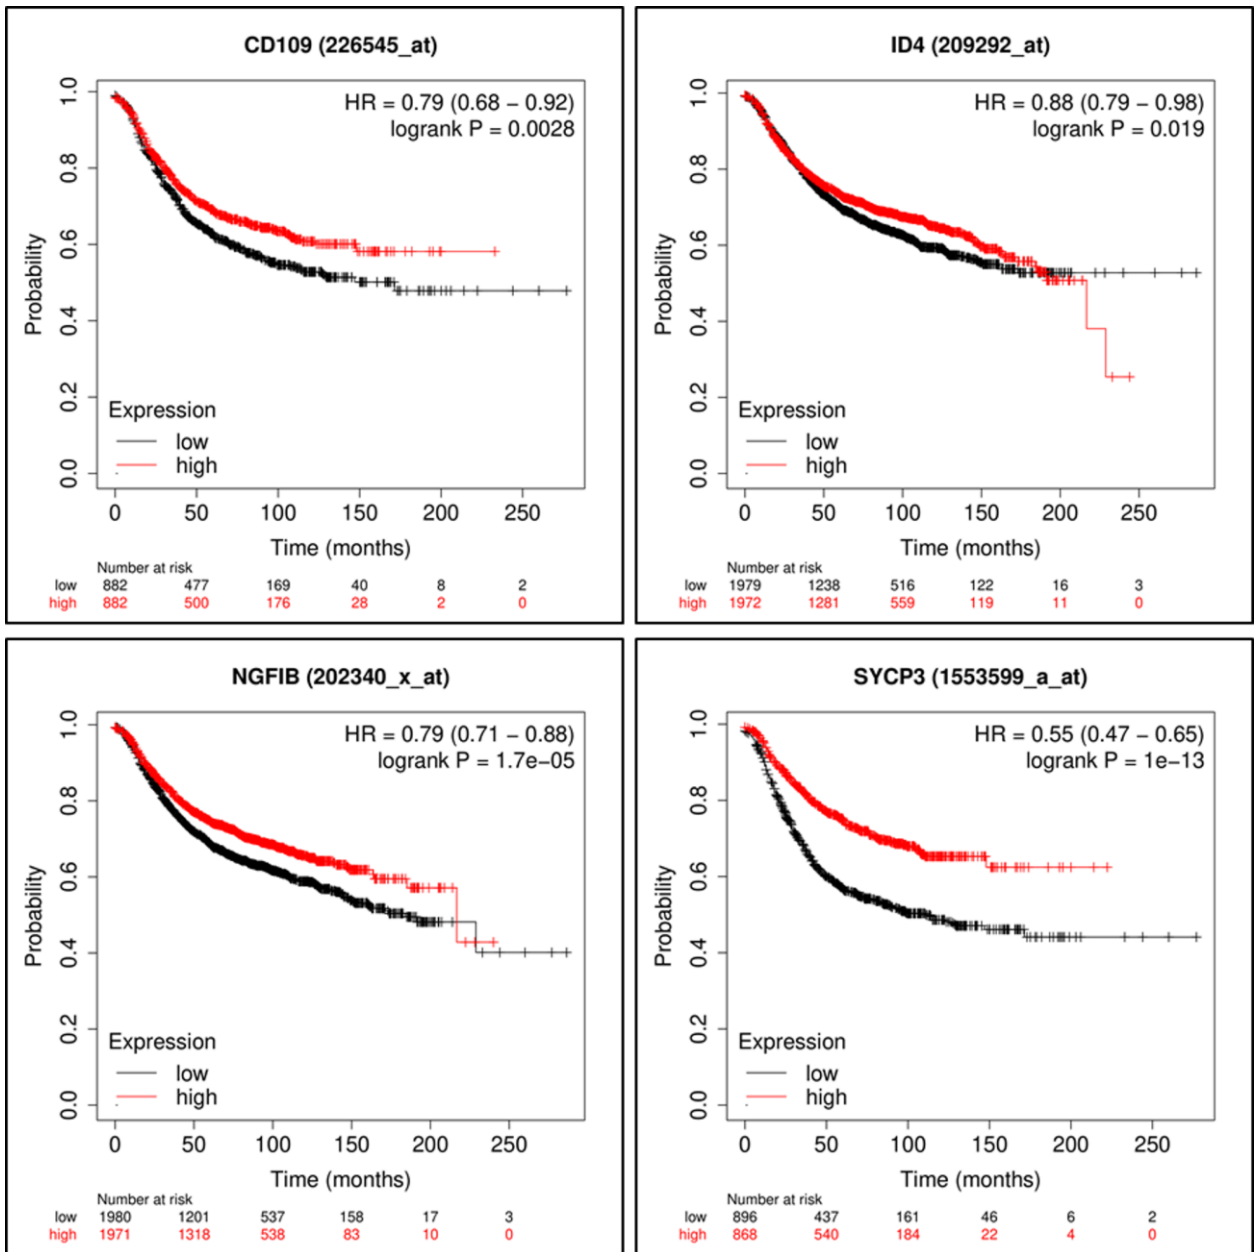

**Figure S7.** Association of DEGs (*CD109*, *ID4*, *NR4A1* and *SYCP3*) in EZR-negative cells with relapse-free survival of breast cancer patients according to Kaplan-Meier Plotter database.

**Table S14.** KEGG enrichment analysis of up- and down-regulated genes in EZR-negative cells located in torpedo-like structures ( $p < 0.05$ )

| Term                                            | P-value | Adjusted P-value | Genes                              |
|-------------------------------------------------|---------|------------------|------------------------------------|
| Homologous recombination                        | 0.000   | 0.102            | <i>RAD51B; RAD51D; EME1; SYCP3</i> |
| Fc gamma R-mediated phagocytosis                | 0.006   | 0.989            | <i>HCK; PLCG2; DOCK2; FCGR2B</i>   |
| Cortisol synthesis and secretion                | 0.016   | 1.000            | <i>NR4A1; KCNK3; CREB5</i>         |
| Arrhythmogenic right ventricular cardiomyopathy | 0.021   | 1.000            | <i>RYR2; ITGA4; ITGA5</i>          |
| beta-Alanine metabolism                         | 0.026   | 1.000            | <i>EHHADH; CARNS1</i>              |
| Hypertrophic cardiomyopathy (HCM)               | 0.032   | 1.000            | <i>RYR2; ITGA4; ITGA5</i>          |
| Insulin secretion                               | 0.033   | 1.000            | <i>RYR2; KCNN3; CREB5</i>          |
| Dilated cardiomyopathy (DCM)                    | 0.038   | 1.000            | <i>RYR2; ITGA4; ITGA5</i>          |
| Aldosterone synthesis and secretion             | 0.045   | 1.000            | <i>NR4A1; KCNK3; CREB5</i>         |

A total of 98 upregulated and 64 downregulated genes have been analyzed

**Table S15.** GO enrichment analysis of up- and down-regulated genes in EZR-negative cells located in torpedo-like structures ( $p < 0.05$ )

| Term                                                                             | P-value | Adjusted P-value | Genes                                |
|----------------------------------------------------------------------------------|---------|------------------|--------------------------------------|
| regulation of phagocytosis (GO:0050764)                                          | 0.000   | 1.000            | <i>HCK; FCGR2B; DOCK2; TLR2</i>      |
| peptidyl-proline hydroxylation (GO:0019511)                                      | 0.001   | 1.000            | <i>EGLN2; P3H2</i>                   |
| regulation of chemokine-mediated signaling pathway (GO:0070099)                  | 0.001   | 1.000            | <i>SLIT3; SLIT2</i>                  |
| strand invasion (GO:0042148)                                                     | 0.001   | 1.000            | <i>RAD51B; RAD51D</i>                |
| neuron projection extension involved in neuron projection guidance (GO:1902284)  | 0.002   | 1.000            | <i>SLIT3; SLIT2</i>                  |
| DNA recombinase assembly (GO:0000730)                                            | 0.002   | 1.000            | <i>RAD51B; RAD51D</i>                |
| glomerular visceral epithelial cell development (GO:0072015)                     | 0.002   | 1.000            | <i>JAG1; MAGI2</i>                   |
| glomerular epithelial cell development (GO:0072310)                              | 0.002   | 1.000            | <i>JAG1; MAGI2</i>                   |
| DNA repair complex assembly (GO:0090735)                                         | 0.002   | 1.000            | <i>RAD51B; RAD51D</i>                |
| axon extension involved in axon guidance (GO:0048846)                            | 0.002   | 0.902            | <i>SLIT3; SLIT2</i>                  |
| double-strand break repair via synthesis-dependent strand annealing (GO:0045003) | 0.002   | 0.820            | <i>RAD51B; RAD51D</i>                |
| endodermal cell differentiation (GO:0035987)                                     | 0.002   | 0.926            | <i>ITGA4; COL7A1; ITGA5</i>          |
| negative regulation of phagocytosis (GO:0050765)                                 | 0.002   | 0.888            | <i>FCGR2B; TLR2</i>                  |
| central nervous system projection neuron axonogenesis (GO:0021952)               | 0.003   | 1.000            | <i>C12ORF57; SLIT2</i>               |
| endoderm formation (GO:0001706)                                                  | 0.003   | 1.000            | <i>ITGA4; COL7A1; ITGA5</i>          |
| negative regulation of chemotaxis (GO:0050922)                                   | 0.003   | 1.000            | <i>SLIT2; AIF1</i>                   |
| response to ionizing radiation (GO:0010212)                                      | 0.004   | 1.000            | <i>RAD51B; RAD51D; FIGNL1; INTS7</i> |
| positive regulation of mitotic cell cycle phase transition (GO:1901992)          | 0.004   | 1.000            | <i>RAD51B; DBF4B; AIF1</i>           |
| glomerular visceral epithelial cell differentiation (GO:0072112)                 | 0.005   | 1.000            | <i>JAG1; MAGI2</i>                   |
| inorganic anion transport (GO:0015698)                                           | 0.005   | 1.000            | <i>SLC34A2; SLC26A8; ANO9</i>        |

|                                                                                       |       |       |                                 |
|---------------------------------------------------------------------------------------|-------|-------|---------------------------------|
| oligosaccharide-lipid intermediate biosynthetic process (GO:0006490)                  | 0.006 | 1.000 | <i>ALG8; ALG1</i>               |
| negative regulation of smooth muscle cell migration (GO:0014912)                      | 0.006 | 1.000 | <i>SLIT2; AIF1</i>              |
| cell migration involved in sprouting angiogenesis (GO:0002042)                        | 0.006 | 1.000 | <i>NR4A1; SLIT2</i>             |
| smooth muscle contraction (GO:0006939)                                                | 0.006 | 1.000 | <i>HMCN2; MYH11</i>             |
| fatty acid beta-oxidation using acyl-CoA oxidase (GO:0033540)                         | 0.006 | 1.000 | <i>ACOX2; EHHADH</i>            |
| maintenance of protein location in nucleus (GO:0051457)                               | 0.006 | 1.000 | <i>MORC3; TOPORS</i>            |
| positive regulation of G2/M transition of mitotic cell cycle (GO:0010971)             | 0.007 | 1.000 | <i>RAD51B; DBF4B</i>            |
| cilium movement (GO:0003341)                                                          | 0.007 | 1.000 | <i>CFAP61; DNAH17; DNAAF4</i>   |
| negative regulation of cell motility (GO:2000146)                                     | 0.008 | 1.000 | <i>JAG1; NAV3; MAGI2; SLIT2</i> |
| positive regulation of cell cycle G2/M phase transition (GO:1902751)                  | 0.008 | 1.000 | <i>RAD51B; DBF4B</i>            |
| mitotic recombination (GO:0006312)                                                    | 0.009 | 1.000 | <i>RAD51B; RAD51D</i>           |
| dolichol-linked oligosaccharide biosynthetic process (GO:0006488)                     | 0.009 | 1.000 | <i>ALG8; ALG1</i>               |
| maintenance of protein localization in organelle (GO:0072595)                         | 0.009 | 1.000 | <i>MORC3; TOPORS</i>            |
| blood vessel endothelial cell migration (GO:0043534)                                  | 0.009 | 1.000 | <i>NR4A1; SLIT2</i>             |
| negative regulation of lymphocyte activation (GO:0051250)                             | 0.010 | 1.000 | <i>VTCN1; FCGR2B</i>            |
| cellular respiration (GO:0045333)                                                     | 0.011 | 1.000 | <i>CHCHD5; NR4A3; CYCS</i>      |
| axon extension (GO:0048675)                                                           | 0.011 | 1.000 | <i>SLIT3; SLIT2</i>             |
| regulation of monocyte chemotaxis (GO:0090025)                                        | 0.014 | 1.000 | <i>SLIT2; AIF1</i>              |
| cellular response to catecholamine stimulus (GO:0071870)                              | 0.015 | 1.000 | <i>RYR2; NR4A3</i>              |
| regulation of proteolysis involved in cellular protein catabolic process (GO:1903050) | 0.015 | 1.000 | <i>DNAAF4; NUDT15</i>           |
| positive regulation of endocytosis (GO:0045807)                                       | 0.015 | 1.000 | <i>DOCK2; FCGR2B; BICD1</i>     |
| response to glucocorticoid (GO:0051384)                                               | 0.016 | 1.000 | <i>SLIT3; SLIT2</i>             |

|                                                                                                              |       |       |                                                  |
|--------------------------------------------------------------------------------------------------------------|-------|-------|--------------------------------------------------|
| receptor clustering (GO:0043113)                                                                             | 0.016 | 1.000 | <i>ITGA4; MAGI2</i>                              |
| negative regulation of sequestering of calcium ion (GO:0051283)                                              | 0.016 | 1.000 | <i>RYR2; PLCG2</i>                               |
| negative regulation of cell migration (GO:0030336)                                                           | 0.017 | 1.000 | <i>JAG1; NAV3; MAGI2; SLIT2</i>                  |
| heterotypic cell-cell adhesion (GO:0034113)                                                                  | 0.017 | 1.000 | <i>ITGA4; ITGA5</i>                              |
| strand displacement (GO:0000732)                                                                             | 0.019 | 1.000 | <i>RAD51B; RAD51D</i>                            |
| response to ketone (GO:1901654)                                                                              | 0.019 | 1.000 | <i>SLIT3; SLIT2</i>                              |
| negative chemotaxis (GO:0050919)                                                                             | 0.019 | 1.000 | <i>SLIT3; SLIT2</i>                              |
| release of sequestered calcium ion into cytosol (GO:0051209)                                                 | 0.020 | 1.000 | <i>RYR2; PLCG2</i>                               |
| negative regulation of endocytosis (GO:0045806)                                                              | 0.021 | 1.000 | <i>FCGR2B; TLR2</i>                              |
| regulation of defense response to virus by virus (GO:0050690)                                                | 0.021 | 1.000 | <i>HCK; DOCK2</i>                                |
| regulation of striated muscle contraction (GO:0006942)                                                       | 0.023 | 1.000 | <i>C12ORF57; RYR2</i>                            |
| dicarboxylic acid transport (GO:0006835)                                                                     | 0.023 | 1.000 | <i>SLC26A8; SLC19A1</i>                          |
| protein alkylation (GO:0008213)                                                                              | 0.023 | 1.000 | <i>VCPKMT; FAM98B</i>                            |
| lysosome localization (GO:0032418)                                                                           | 0.023 | 1.000 | <i>SNAPIN; NR4A3</i>                             |
| negative regulation of lymphocyte proliferation (GO:0050672)                                                 | 0.023 | 1.000 | <i>VTCN1; FCGR2B</i>                             |
| Fc receptor mediated stimulatory signaling pathway (GO:0002431)                                              | 0.024 | 1.000 | <i>HCK; NR4A3; PLCG2; FCGR2B</i>                 |
| regulation of actin cytoskeleton reorganization (GO:2000249)                                                 | 0.024 | 1.000 | <i>HCK; RAPGEF3</i>                              |
| regulation of leukocyte chemotaxis (GO:0002688)                                                              | 0.024 | 1.000 | <i>ZNF580; SLIT2</i>                             |
| negative regulation of transmembrane receptor protein serine/threonine kinase signaling pathway (GO:0090101) | 0.025 | 1.000 | <i>TGFB111; CD109; MAGI2</i>                     |
| cellular response to hormone stimulus (GO:0032870)                                                           | 0.027 | 1.000 | <i>NR4A3; SLIT3; SLIT2</i>                       |
| ion transport (GO:0006811)                                                                                   | 0.031 | 1.000 | <i>RYR2; SCNN1D; SLC26A8; ANO9; ASIC3; KCNK3</i> |
| epithelial tube morphogenesis (GO:0060562)                                                                   | 0.031 | 1.000 | <i>RYR2; SLIT2</i>                               |

|                                                                          |       |       |                                                                                     |
|--------------------------------------------------------------------------|-------|-------|-------------------------------------------------------------------------------------|
| regulation of interleukin-8 production (GO:0032677)                      | 0.031 | 1.000 | <i>ZNF580; TLR2</i>                                                                 |
| negative regulation of T cell activation (GO:0050868)                    | 0.031 | 1.000 | <i>VTCN1; FCGR2B</i>                                                                |
| regulation of microtubule polymerization (GO:0031113)                    | 0.033 | 1.000 | <i>NAV3; MAP2</i>                                                                   |
| positive regulation of ATPase activity (GO:0032781)                      | 0.033 | 1.000 | <i>RYR2; DNAJC9</i>                                                                 |
| ion transmembrane transport (GO:0034220)                                 | 0.033 | 1.000 | <i>RYR2; SCNN1D; ANO9; ASIC3; KCNK3</i>                                             |
| calcium ion transmembrane import into cytosol (GO:0097553)               | 0.034 | 1.000 | <i>RYR2; PLCG2</i>                                                                  |
| vesicle-mediated transport in synapse (GO:0099003)                       | 0.034 | 1.000 | <i>SNAPIN; SYT8</i>                                                                 |
| positive regulation of smooth muscle cell proliferation (GO:0048661)     | 0.036 | 1.000 | <i>NR4A3; AIF1</i>                                                                  |
| organic cyclic compound biosynthetic process (GO:1901362)                | 0.036 | 1.000 | <i>NFS1; TFCP2L1</i>                                                                |
| regulation of cell proliferation (GO:0042127)                            | 0.039 | 1.000 | <i>WWTR1; HCK; JAG1; NR4A3; TGFB111; MAGI2; P3H2; FAM98B; DBF4B; CGRRF1; SHCBP1</i> |
| regulation of proteasomal protein catabolic process (GO:0061136)         | 0.040 | 1.000 | <i>DNAAF4; NUDT15</i>                                                               |
| positive regulation of phagocytosis (GO:0050766)                         | 0.040 | 1.000 | <i>FCGR2B; DOCK2</i>                                                                |
| DNA biosynthetic process (GO:0071897)                                    | 0.040 | 1.000 | <i>RAD51B; RAD51D</i>                                                               |
| transcription initiation from RNA polymerase II promoter (GO:0006367)    | 0.041 | 1.000 | <i>WWTR1; NR4A1; CDK8; NR4A3</i>                                                    |
| negative regulation of cytokine-mediated signaling pathway (GO:0001960)  | 0.042 | 1.000 | <i>SLIT3; SLIT2</i>                                                                 |
| neuron migration (GO:0001764)                                            | 0.042 | 1.000 | <i>DNAAF4; MARK1</i>                                                                |
| positive regulation of epithelial to mesenchymal transition (GO:0010718) | 0.042 | 1.000 | <i>WWTR1; TGFB111</i>                                                               |
| regulation of ATPase activity (GO:0043462)                               | 0.042 | 1.000 | <i>VCPKMT; DNAJC9</i>                                                               |
| bicarbonate transport (GO:0015701)                                       | 0.044 | 1.000 | <i>CA5B; SLC26A8</i>                                                                |

|                                                                                           |       |       |                                                                         |
|-------------------------------------------------------------------------------------------|-------|-------|-------------------------------------------------------------------------|
| positive regulation of receptor-mediated endocytosis<br>(GO:0048260)                      | 0.044 | 1.000 | <i>MAGI2; BICD1</i>                                                     |
| negative regulation of apoptotic process<br>(GO:0043066)                                  | 0.044 | 1.000 | <i>HCK; PRELID1; FIGNL1; IFI6;<br/>VTCN1; ITGA5; TOPORS;<br/>MAD2L1</i> |
| cell morphogenesis involved in neuron differentiation<br>(GO:0048667)                     | 0.044 | 1.000 | <i>MAP2; SLIT3; SLIT2</i>                                               |
| protein localization to organelle (GO:0033365)                                            | 0.044 | 1.000 | <i>BICD1; TOPORS; GET4</i>                                              |
| cellular response to radiation (GO:0071478)                                               | 0.045 | 1.000 | <i>FIGNL1; INTS7</i>                                                    |
| cellular response to lipoteichoic acid (GO:0071223)                                       | 0.048 | 1.000 | <i>TLR2</i>                                                             |
| negative regulation of membrane potential<br>(GO:0045837)                                 | 0.048 | 1.000 | <i>PRELID1</i>                                                          |
| macropinocytosis (GO:0044351)                                                             | 0.048 | 1.000 | <i>DOCK2</i>                                                            |
| release of sequestered calcium ion into cytosol by<br>sarcoplasmic reticulum (GO:0014808) | 0.048 | 1.000 | <i>RYR2</i>                                                             |
| response to heparin (GO:0071503)                                                          | 0.048 | 1.000 | <i>SLIT2</i>                                                            |
| striated muscle hypertrophy (GO:0014897)                                                  | 0.048 | 1.000 | <i>RYR2</i>                                                             |
| regulation of nuclear cell cycle DNA replication<br>(GO:0033262)                          | 0.048 | 1.000 | <i>DBF4B</i>                                                            |
| negative regulation of acute inflammatory response<br>(GO:0002674)                        | 0.048 | 1.000 | <i>FCGR2B</i>                                                           |
| cellular response to monoamine stimulus<br>(GO:0071868)                                   | 0.048 | 1.000 | <i>NR4A3</i>                                                            |
| response to lipoteichoic acid (GO:0070391)                                                | 0.048 | 1.000 | <i>TLR2</i>                                                             |
| positive regulation of humoral immune response<br>(GO:0002922)                            | 0.048 | 1.000 | <i>FCGR2B</i>                                                           |
| cellular response to bacterial lipopeptide<br>(GO:0071221)                                | 0.048 | 1.000 | <i>TLR2</i>                                                             |
| response to DNA damage checkpoint signaling<br>(GO:0072423)                               | 0.048 | 1.000 | <i>EME1</i>                                                             |
| positive regulation of phospholipid transport<br>(GO:2001140)                             | 0.048 | 1.000 | <i>PRELID1</i>                                                          |
| negative regulation of phospholipase activity<br>(GO:0010519)                             | 0.048 | 1.000 | <i>BICD1</i>                                                            |



|                                                                                                             |       |       |                              |
|-------------------------------------------------------------------------------------------------------------|-------|-------|------------------------------|
| regulation of skeletal muscle contraction<br>(GO:0014819)                                                   | 0.048 | 1.000 | <i>C12ORF57</i>              |
| positive regulation of protein acetylation<br>(GO:1901985)                                                  | 0.048 | 1.000 | <i>RAPGEF3</i>               |
| retinal ganglion cell axon guidance (GO:0031290)                                                            | 0.048 | 1.000 | <i>SLIT2</i>                 |
| response to catecholamine (GO:0071869)                                                                      | 0.048 | 1.000 | <i>NR4A3</i>                 |
| negative regulation of mononuclear cell migration<br>(GO:0071676)                                           | 0.048 | 1.000 | <i>SLIT2</i>                 |
| nucleoside phosphate catabolic process (GO:1901292)                                                         | 0.048 | 1.000 | <i>NUDT15</i>                |
| negative regulation of leukocyte degranulation<br>(GO:0043301)                                              | 0.048 | 1.000 | <i>FCGR2B</i>                |
| positive regulation of myeloid leukocyte cytokine<br>production involved in immune response<br>(GO:0061081) | 0.048 | 1.000 | <i>NR4A3</i>                 |
| positive regulation of protein localization to<br>centrosome (GO:1904781)                                   | 0.048 | 1.000 | <i>BICD1</i>                 |
| metal ion transport (GO:0030001)                                                                            | 0.049 | 1.000 | <i>SCNN1D; SLC5A4; KCNK3</i> |
| sprouting angiogenesis (GO:0002040)                                                                         | 0.049 | 1.000 | <i>NR4A1; SLIT2</i>          |
| positive regulation of interleukin-8 production<br>(GO:0032757)                                             | 0.049 | 1.000 | <i>ZNF580; TLR2</i>          |
| regulation of T cell activation (GO:0050863)                                                                | 0.049 | 1.000 | <i>PRELID1; VTCN1</i>        |
| regulation of smooth muscle cell proliferation<br>(GO:0048660)                                              | 0.049 | 1.000 | <i>NR4A3; AIFI</i>           |

A total of 98 upregulated and 64 downregulated genes have been analyzed

**Table S16.** Breast cancer patients with distant metastasis and positive expression of KIF14 and Mieap and negative expression of EZR at the tips of torpedo-like structures

| Patients | KIF14 expression | Mieap expression | EZR loss |
|----------|------------------|------------------|----------|
| 1        | No               | No               | No       |
| 2        | Yes              | Yes              | Yes      |
| 3        | Yes              | Yes              | Yes      |
| 4        | No               | Yes              | Yes      |
| 5        | No               | No               | No       |
| 6        | Yes              | Yes              | No       |
| 7        | Yes              | Yes              | No data  |
| 8        | Yes              | Yes              | Yes      |
| 9        | Yes              | Yes              | Yes      |
| 10       | Yes              | Yes              | Yes      |
| 11       | Yes              | Yes              | Yes      |
| 12       | No data          | No data          | Yes      |
| 13       | Yes              | Yes              | Yes      |
| 14       | Yes              | Yes              | Yes      |
| 15       | Yes              | Yes              | Yes      |
| 16       | Yes              | No data          | No data  |
| 17       | Yes              | Yes              | Yes      |
| 18       | No data          | No               | Yes      |
| 19       | Yes              | Yes              | Yes      |

Orange color indicates the simultaneous expression of all three markers. Blue color indicates the simultaneous expression of any two markers.

**Table S17.** Expression of *MKI67*, *PLAU*, *PLAUR*, *MMP2*, *MMP9* and *MMP13* genes in KIF14-positive, Mieap-positive, EZR-negative cells located in torpedo-like structures

| Markers | KIF14-positive* |         | Mieap-positive** |         | EZR-negative*** |         |
|---------|-----------------|---------|------------------|---------|-----------------|---------|
|         | logFC           | p-value | logFC            | p-value | logFC           | p-value |
| MKI67   | -0.425          | 0.802   | 0.470            | 0.677   | 1.736           | 0.126   |
| PLAU    | -               | -       | 0.483            | 0.823   | -               | -       |
| PLAUR   | 0.004           | 0.999   | 1.255            | 0.435   | -0.306          | 0.759   |
| MMP2    | 1.228           | 0.506   | 0.495            | 0.669   | 0.789           | 0.461   |
| MMP9    | -1.295          | 0.615   | 3.203            | 0.252   | -0.380          | 0.785   |
| MMP13   | -5.336          | 0.027   | -1.182           | 0.626   | -0.493          | 0.798   |

\*, compared to KIF14-negative cells; \*\*, compared to Mieap-negative cells; \*\*\*, compared to EZR-positive cells.

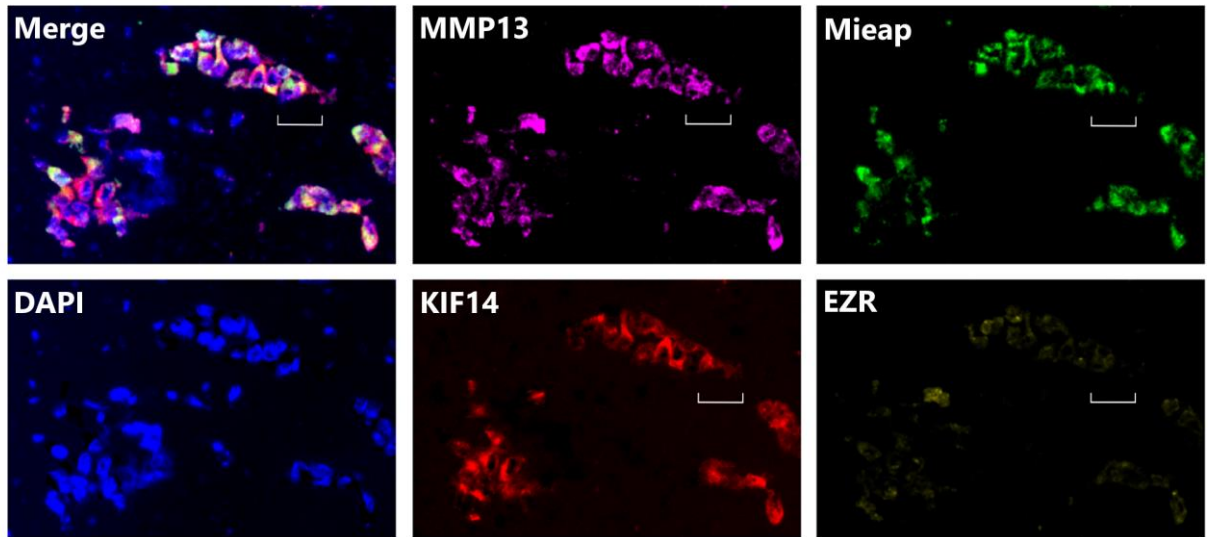

**Figure S8.** Expression of KIF14, Mieap, EZR and MMP13 in the torpedo-like structures.

**Table S18.** Clinicopathological parameters of breast cancer patients

| Parameter              |                 | Number of cases, % |
|------------------------|-----------------|--------------------|
| Age                    | ≤ 50            | 45 (53.5)          |
|                        | > 50            | 35 (41.7)          |
|                        | No data         | 4 (4.8)            |
| Menopause              | Premenopausal   | 44 (52.4)          |
|                        | Postmenopausal  | 35 (41.6)          |
|                        | No data         | 5 (6.0)            |
| Tumor size             | T1              | 32 (38.1)          |
|                        | T2              | 38 (45.2)          |
|                        | T3              | 3 (3.6)            |
|                        | T4              | 7 (8.3)            |
|                        | No data         | 4 (4.8)            |
| Grade                  | 1               | 4 (4.7)            |
|                        | 2               | 58 (69.1)          |
|                        | 3               | 9 (10.7)           |
|                        | No data         | 13 (15.5)          |
| Lymph node metastases  | N0              | 33 (39.2)          |
|                        | N1              | 33 (39.2)          |
|                        | N2              | 9 (10.7)           |
|                        | N3              | 6 (7.4)            |
|                        | No data         | 3 (3.6)            |
| Distant metastases     | M0              | 45 (53.6)          |
|                        | M1              | 39 (46.4)          |
| Estrogen receptors     | Yes             | 53 (63.1)          |
|                        | No              | 26 (31.0)          |
| Progesterone receptors | No data         | 5 (5.9)            |
|                        | Yes             | 46 (54.8)          |
|                        | No              | 31 (36.9)          |
| HER2                   | No data         | 7 (8.33)           |
|                        | Yes             | 39 (46.4)          |
|                        | No              | 39 (46.4)          |
|                        | No data         | 6 (7.2)            |
| Molecular subtype      | Luminal A       | 14 (16.7)          |
|                        | Luminal B       | 39 (46.4)          |
|                        | Triple-negative | 17 (20.2)          |
|                        | HER2-positive   | 9 (10.7)           |
| NAC                    | No data         | 5 (6.0)            |
|                        | Yes             | 34 (40.5)          |
|                        | No              | 50 (59.5)          |

NAC, neoadjuvant chemotherapy

**Table S19.** Protocol of the assessment of immunohistochemical staining in breast tumors

| Parameter                                                                                                          | Value                                                 |
|--------------------------------------------------------------------------------------------------------------------|-------------------------------------------------------|
| Diffuse staining within the tumor section                                                                          | Yes, No;<br>Weak,<br>Moderate                         |
| Tumor cells with positive staining in comparison with background staining (regardless of morphological structures) | Up to 10%,<br>Up to 50%                               |
| Tumor cells with negative staining compared to background staining (regardless of morphological structures)        | More than<br>50%<br>Totally                           |
| Tumor cells with negative staining at the tips (up to 3 rows) of:                                                  |                                                       |
| torpedo-like sprouts associated with solid structures                                                              | Yes, No;<br>Single, Many;                             |
| torpedo-like structures (separated from solid structures)                                                          | No structures                                         |
| Negative staining in single tumor cells                                                                            | Yes, No;<br>Single, Many;<br>No single<br>tumor cells |
| Tumor cells with positive staining at the tips (up to 3 rows) of:                                                  |                                                       |
| torpedo-like sprouts associated with solid structures                                                              | Yes, No;<br>Single, Many;                             |
| torpedo-like structures (separated from solid structures)                                                          | No structures                                         |
| Tumor cells with positive focal or diffuse staining in torpedo-like structures (except for the tips)               | Yes, No                                               |
| Positive staining in single tumor cells                                                                            | Yes, No;<br>Single, Many;<br>No structures            |
| Negative segmental staining at the periphery (up to 2 layers) of structures in the cells with                      |                                                       |
| solid                                                                                                              | Yes, No;                                              |
| alveolar                                                                                                           | Single, Many;                                         |
| trabecular                                                                                                         | No structures                                         |
| tubular                                                                                                            |                                                       |
| Negative segmental staining at the periphery (up to 2 layers) of structures in the cells with                      |                                                       |
| solid                                                                                                              | Yes, No;                                              |
| alveolar                                                                                                           | Single, Many;                                         |
| trabecular                                                                                                         | No structures                                         |
| tubular                                                                                                            |                                                       |
| Positive segmental staining at the periphery (up to 2 layers) of structures in the cells with                      |                                                       |
| solid                                                                                                              | Yes, No;                                              |
| alveolar                                                                                                           | Single, Many;                                         |
| trabecular                                                                                                         | No structures                                         |
| tubular                                                                                                            |                                                       |
| Positive segmental staining at the periphery (up to 2 layers) of structures in the cells with                      |                                                       |
| solid                                                                                                              | Yes, No;                                              |
| alveolar                                                                                                           | Single, Many;                                         |
| trabecular                                                                                                         | No structures                                         |
| tubular                                                                                                            |                                                       |
| Atypical positive staining with nonspecific localization in tumor cells                                            | Yes, No                                               |

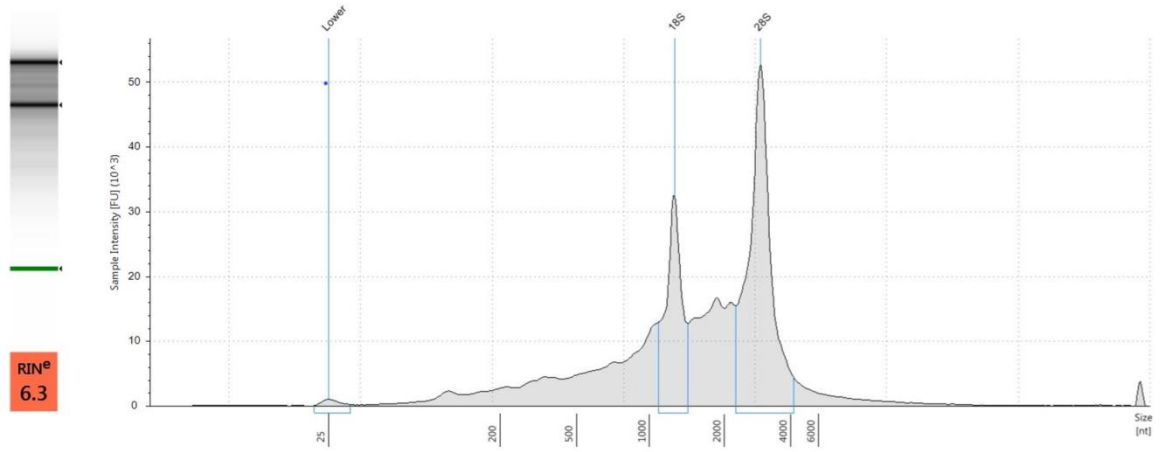

**Figure S9.** RNA integrity (RIN) of tumor tissue section following RNA-preserving immunolabeling.

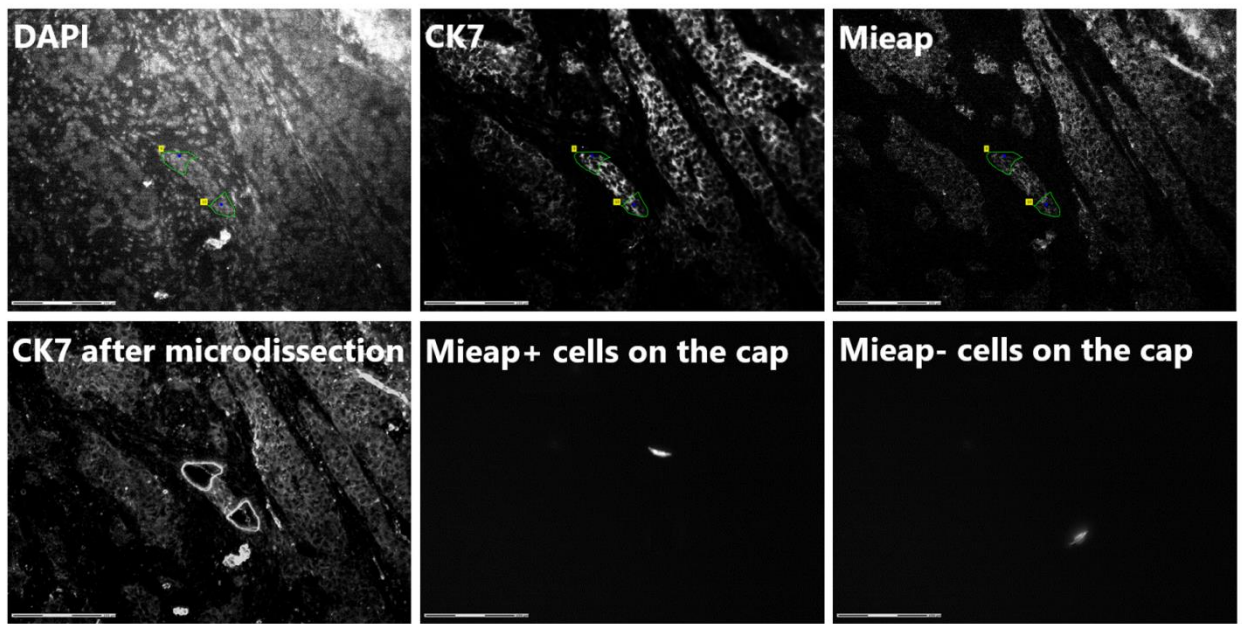

**Figure S10.** Fluorescence-guided laser microdissection on the example of CK7-positive Mieap-positive and Mieap-negative cells of the torpedolike structure in breast tumor.
